# Supplementary material for: Fuzzy evaluation and explainable machine learning for diagnosis of rheumatic and autoimmune diseases
Source: PeerJ Comput Sci. 2025 Aug 11;11:e3096. doi: 10.7717/peerj-cs.3096 (PMC12453786; doi:10.7717/peerj-cs.3096)
Supplement: Supplemental Information 1 [file peerj-cs-11-3096-s001.xlsx]

## Sheet: Sheet1
Age	Gender	ESR	CRP	RF	Anti-CCP	HLA-B27	ANA	Anti-Ro	Anti-La	Anti-dsDNA	Anti-Sm	C3	C4	Disease
70	Male	39.1923	18.6016	34.2227		Positive	Negative	Positive	Negative	Positive	Positive	172.867	27.3748	Rheumatoid Arthritis
39	Female	26.3879	21.6672	35.5403	28.8828		Negative		Positive	Positive		100.507		Rheumatoid Arthritis
36	Female	41.6033	15.5694	21.3304	21.3151	Negative	Negative	Negative	Positive	Negative		158.665	12.0382	Rheumatoid Arthritis
35	Male	43.3641	23.4048	25.9905			Positive	Positive	Positive			119.106		Rheumatoid Arthritis
37	Female	30.5024	22.3911			Positive	Negative		Negative	Positive		144.214	49.6632	Rheumatoid Arthritis
41	Female	36.8079	12.5303	21.5258	37.2575		Positive	Negative	Negative		Negative	169.966	71.9534	Rheumatoid Arthritis
32	Male	42.9589		22.2559	39.5442	Negative	Positive					146.231	21.723	Rheumatoid Arthritis
60	Female	39.404	19.3178	31.8365		Negative	Positive		Negative	Positive	Positive	100.882	52.5532	Rheumatoid Arthritis
51	Female	29.3543	18.1128		37.6782	Negative	Positive	Positive	Positive	Positive	Negative	166.278	65.8215	Rheumatoid Arthritis
68	Female	37.8085			24.9703	Positive	Negative	Negative	Positive		Positive	123.25	50.2206	Rheumatoid Arthritis
24	Male	31.7659	13.7198	31.6492		Positive	Negative			Negative	Negative	170.449	57.5816	Rheumatoid Arthritis
62	Female	26.5416	24.4955	35.8264	30.3234	Negative		Negative	Negative	Negative		112.849	73.3254	Rheumatoid Arthritis
41	Female	37.9606	13.5784	39.9823	32.3357			Positive	Negative		Negative	178.639	36.1347	Rheumatoid Arthritis
37	Female	39.8043		22.7459	29.4664	Negative	Negative	Positive				163.693	48.537	Rheumatoid Arthritis
57	Female	49.1369			29.1711	Negative		Negative	Negative	Positive	Negative	134.512	71.4629	Rheumatoid Arthritis
68	Male	32.6695	25.045	34.7347	24.6028	Positive		Negative	Negative		Positive	108.345	27.9265	Rheumatoid Arthritis
24	Male	33.8371		28.0354	29.5756	Negative	Negative	Positive				201.393		Rheumatoid Arthritis
78	Male	46.0253	23.6795	21.558	36.8387	Positive	Positive	Negative	Negative	Negative		176.567	36.9654	Rheumatoid Arthritis
43	Female	32.9217	16.1218	33.2692	34.2523	Positive		Positive	Negative	Positive	Negative	132.884	71.7547	Rheumatoid Arthritis
23	Female	29.0727		21.1217	25.9583	Positive	Positive	Positive	Negative		Negative	150.267	37.0729	Rheumatoid Arthritis
20	Female		27.7099	35.7513	37.4038	Negative	Negative	Positive	Negative	Positive		109.736	32.7266	Rheumatoid Arthritis
51	Female	29.6154	25.839	22.5438	24.9227	Negative		Negative			Positive	141.006	17.6049	Rheumatoid Arthritis
30	Female	39.4608	24.2853	39.8538		Negative	Positive		Positive			169.881	63.4687	Rheumatoid Arthritis
47	Female	44.1738	23.0826	34.3134	26.3085	Negative	Positive		Negative	Negative	Negative	168.848	61.5422	Rheumatoid Arthritis
46	Female	46.6125	20.4621	28.4053	35.7767	Negative	Negative		Negative	Negative	Negative	95.6851	16.2205	Rheumatoid Arthritis
23	Female	35.1108		21.7042		Negative	Negative		Positive	Negative		150.852		Rheumatoid Arthritis
35	Female	49.1378		31.676		Negative	Positive	Positive	Positive			190.155	61.672	Rheumatoid Arthritis
22	Male	27.1396	24.0311	33.4907	28.6904	Negative	Positive		Positive	Negative	Negative	115.642	46.7836	Rheumatoid Arthritis
44	Male	28.566	15.358	23.9241	29.9049	Positive	Negative	Negative	Negative	Negative		176.608	72.3829	Rheumatoid Arthritis
37	Male	28.5603	21.7353	39.3355	28.1457	Positive	Positive		Negative			152.234	66.1711	Rheumatoid Arthritis
33	Male	48.1723	27.3945	38.3114	25.7147	Negative	Positive	Negative		Positive		108.885	18.2954	Rheumatoid Arthritis
20	Male	27.0965	14.0551	22.272					Positive	Negative		96.9401	43.1747	Rheumatoid Arthritis
73	Male	29.0772	27.0458	30.8135	22.3421	Negative		Negative	Negative			175.847	36.6491	Rheumatoid Arthritis
47	Male	45.4909	27.066	23.912	32.7108	Positive	Negative	Negative	Negative	Negative		139.31	60.5351	Rheumatoid Arthritis
29	Male	40.2486		31.0794	32.8504	Negative		Positive	Negative	Positive		142.098	49.825	Rheumatoid Arthritis
57	Female	37.7343	19.1045		33.1337	Positive		Positive	Positive		Positive	162.144	20.4155	Rheumatoid Arthritis
44	Female	30.4075	13.104	26.5307	30.6855	Positive	Negative		Positive	Positive	Positive	140.449	39.901	Rheumatoid Arthritis
45	Female		23.3403	39.4912		Negative	Positive	Positive	Positive	Positive		203.704	36.611	Rheumatoid Arthritis
64	Male	41.9863	17.9876	37.4712		Negative	Positive	Positive	Positive	Positive	Negative	202.042	21.4145	Rheumatoid Arthritis
24	Female		20.1256	31.8467	28.5823		Positive	Positive	Negative	Positive	Negative	181.365		Rheumatoid Arthritis
57	Male	38.3894			22.5759	Positive	Positive	Positive	Positive		Positive	97.6	49.4654	Rheumatoid Arthritis
46	Female	28.7528	15.5212			Negative	Negative	Positive	Positive			154.838	66.9573	Rheumatoid Arthritis
29	Female	42.7442	13.8182	22.4789	38.4262		Negative	Positive		Positive	Positive	135.577	40.5595	Rheumatoid Arthritis
67	Female	41.4055	27.7485	31.6408		Positive	Negative	Positive			Negative	100.409	54.9608	Rheumatoid Arthritis
79	Male	43.9194	17.4624	28.4911	21.7972	Positive	Negative	Positive	Positive	Positive			64.1091	Rheumatoid Arthritis
22	Female	28.9774	20.5182	26.6886	29.8701	Positive	Negative	Negative	Negative	Negative				Rheumatoid Arthritis
51	Female	39.901	26.8086	34.0405		Negative	Positive			Positive	Negative	198.618	37.7055	Rheumatoid Arthritis
51	Female	33.2419	13.1305	30.1165		Positive	Negative	Negative	Negative			100.361	70.1703	Rheumatoid Arthritis
61	Female	26.6116	28.9085	33.1901		Positive	Positive	Positive	Negative	Negative	Negative	159.577		Rheumatoid Arthritis
29	Female	38.5255	22.2151	30.4153	35.5825	Positive	Positive		Positive	Positive	Positive	107.534		Rheumatoid Arthritis
39	Male	36.3209	25.2743	22.7524	32.3405				Positive		Positive	123.559	66.0965	Rheumatoid Arthritis
35	Male	29.2643	27.6176	32.3836		Positive		Negative		Negative		157.759		Rheumatoid Arthritis
74	Female	37.0176	25.0582			Positive	Positive	Negative	Positive			170.67		Rheumatoid Arthritis
54	Male	28.0422	26.9548	31.721			Positive	Positive		Negative		127.045	65.7578	Rheumatoid Arthritis
23	Female	38.7987	14.9104		26.2819	Positive	Positive		Negative	Negative	Positive	146.875	21.3266	Rheumatoid Arthritis
31	Female	35.5233			31.0856	Positive	Positive		Positive	Negative		168.741	16.8613	Rheumatoid Arthritis
72	Female	29.1186	23.9041	29.7968	24.8965	Negative			Positive	Negative	Negative	142.138	74.9176	Rheumatoid Arthritis
35	Male	43.0754	25.6687	30.5139		Positive		Positive	Positive		Positive	114.568	40.785	Rheumatoid Arthritis
71	Male	29.8135	11.9661	23.9788	23.4252	Positive		Negative		Positive		150.01	31.1798	Rheumatoid Arthritis
73	Male	30.6603	16.1943	26.8448	31.1691	Negative	Negative	Negative	Positive			124.345	16.5135	Rheumatoid Arthritis
33	Female	28.11	17.6755	35.8795	25.3863	Negative			Positive			192.361	47.2433	Rheumatoid Arthritis
75	Male	41.9438	14.0737	21.176			Negative	Negative	Positive	Negative		117.578	61.6071	Rheumatoid Arthritis
39	Male	26.851	11.2746	38.3186	39.2141	Positive	Negative		Negative		Positive	166.493	49.6694	Rheumatoid Arthritis
27	Male	27.9346	21.9766		31.0937			Negative	Negative	Negative	Positive	127.062	58.2832	Rheumatoid Arthritis
47	Male	43.119	19.983	38.1144	37.1674		Negative	Positive	Negative			178.988	30.356	Rheumatoid Arthritis
61	Male	31.0671	11.9957	24.7221	34.7932	Positive	Positive	Negative				95.5209	35.4291	Rheumatoid Arthritis
52	Female	39.8178	20.0819	32.1078	21.2111	Positive		Positive	Negative	Positive		132.032	22.7819	Rheumatoid Arthritis
20	Male	47.0422	14.7211	29.7636	35.581	Positive	Negative	Negative	Negative			120.256		Rheumatoid Arthritis
57	Female		19.3549	30.1404	34.3058	Negative	Negative	Negative	Positive		Positive	93.0514	18.9994	Rheumatoid Arthritis
78	Female	39.8779	14.638	36.4799	30.4931	Positive		Negative			Negative	116.161	20.8709	Rheumatoid Arthritis
54	Male	48.6732	26.268	35.1462		Positive	Positive		Positive			96.8572	57.1961	Rheumatoid Arthritis
20	Male	33.7976	15.3794	32.2493	36.6646	Negative	Positive	Positive	Negative	Negative		89.5888	65.1516	Rheumatoid Arthritis
23	Male	36.3083	19.0333	22.8388		Negative	Positive	Negative	Negative	Negative			70.2977	Rheumatoid Arthritis
53	Female	40.3714	25.8881			Negative	Negative	Negative	Negative		Negative	174.805	24.95	Rheumatoid Arthritis
42	Female		16.95	39.7532	21.3329	Positive	Negative	Positive	Negative	Negative		130.362	29.2258	Rheumatoid Arthritis
58	Female	38.1849	12.0544	26.8366		Positive	Negative	Negative		Negative	Negative		67.6464	Rheumatoid Arthritis
28	Male	33.8515	29.0181	38.264	24.6614	Negative	Positive		Negative			128.035	66.7984	Rheumatoid Arthritis
68	Female	34.975	20.1928	38.4889		Negative	Negative	Negative	Negative			112.504	23.3391	Rheumatoid Arthritis
33	Female	35.4503	14.7042	21.6818	39.2149	Negative		Negative		Negative				Rheumatoid Arthritis
71	Male		11.8661	21.908		Positive	Positive			Negative		98.1288	64.6623	Rheumatoid Arthritis
50	Female	29.4036	27.8497	28.0621	21.9688	Negative	Positive	Positive		Negative	Negative	152.996	25.6962	Rheumatoid Arthritis
49	Female		25.0488	30.9478	34.9961	Positive		Negative		Positive	Negative	109.799	39.8977	Rheumatoid Arthritis
74	Female	30.973	18.8476	39.2235	27.4836	Positive	Negative	Negative	Negative			161.416	24.5528	Rheumatoid Arthritis
62	Female	26.234	19.0869	30.7681	29.9248	Negative	Negative	Negative		Positive	Positive		26.0208	Rheumatoid Arthritis
51	Male	38.9282	24.1849	24.7506	36.4103	Positive	Positive	Positive	Negative	Negative	Positive	169.169		Rheumatoid Arthritis
76	Female		22.6065		28.6065	Positive	Negative	Positive	Positive			187.635	49.4015	Rheumatoid Arthritis
20	Male	29.2922	29.8865	39.4194	22.7134	Negative		Negative		Negative		120.65	66.6561	Rheumatoid Arthritis
54	Male	31.4452	15.4477	24.8524	29.6897	Negative		Positive	Positive		Negative	119.805	65.8813	Rheumatoid Arthritis
55	Female	37.2318	19.4734	30.2868	27.6941	Positive	Positive	Negative		Positive	Positive		41.3393	Rheumatoid Arthritis
33	Female	27.8303	23.2579	33.8539	27.2488	Positive	Positive	Positive	Positive		Negative	100.879	33.4021	Rheumatoid Arthritis
40	Female	37.5904			22.666	Positive		Negative	Negative	Negative	Positive	187.87	35.2013	Rheumatoid Arthritis
27	Female	34.3122	19.058	38.8515	34.1986	Negative	Negative	Negative	Positive		Negative	117.438	31.106	Rheumatoid Arthritis
38	Male	30.2273	13.1864	37.3198	33.5405	Positive	Negative	Negative	Positive	Positive	Negative	160.839	47.9369	Rheumatoid Arthritis
25	Female	29.8561			26.0954	Negative	Positive		Positive			193.968	32.0998	Rheumatoid Arthritis
51	Male	26.6977	15.5145	33.9545	29.0544	Negative		Negative	Positive	Positive		157.173	52.1254	Rheumatoid Arthritis
26	Female	33.8075	14.6444	23.4515	32.7231	Negative	Positive	Positive	Negative			109.669	42.9282	Rheumatoid Arthritis
65	Female	38.3309	12.9956	37.2029		Negative	Positive	Negative	Positive	Negative		109.622	69.6423	Rheumatoid Arthritis
26	Male		29.9444	22.7051	27.3291			Negative			Negative	122.761		Rheumatoid Arthritis
40	Male	38.7655	13.0093	39.3272		Negative		Positive	Negative	Positive	Negative			Rheumatoid Arthritis
24	Male	27.5656		27.8919	31.8	Positive		Positive			Negative	103.65	27.7538	Rheumatoid Arthritis
77	Male	33.781	19.3962	33.5436	33.9415	Negative	Negative		Negative	Positive	Negative	182.445	54.2481	Rheumatoid Arthritis
64	Male	42.9649			28.3713	Positive			Negative			157.397	35.6375	Rheumatoid Arthritis
76	Female	27.442	25.5768	36.099		Negative	Positive	Negative	Positive	Positive		149.554		Rheumatoid Arthritis
78	Female	36.9823	12.8265	30.0006		Negative	Negative	Positive	Positive	Positive		95.311	42.253	Rheumatoid Arthritis
54	Female	26.617	24.4588	39.0325	33.1506	Positive	Positive	Positive		Negative	Positive		70.9769	Rheumatoid Arthritis
63	Male	31.5947	26.3707	25.9632	35.6736	Positive	Negative	Negative	Negative			167.048	65.5978	Rheumatoid Arthritis
29	Female	37.6897	22.9725	37.6948	35.9348	Negative	Positive	Positive			Positive	104.341	51.0289	Rheumatoid Arthritis
52	Female	29.68	28.8256	23.8963	35.4218	Negative	Positive	Negative	Negative		Positive	113.926	62.0845	Rheumatoid Arthritis
71	Female	26.3936	24.2443	22.8256	27.9245	Negative	Negative	Positive	Negative	Positive	Positive	175.006	25.61	Rheumatoid Arthritis
27	Male	37.5491	15.0512		29.7712	Positive	Positive	Negative		Negative	Positive	147.571	28.3754	Rheumatoid Arthritis
35	Male	37.0262	24.0393	33.3766	35.6047	Positive	Positive	Negative	Negative	Negative	Negative	198.278	37.0137	Rheumatoid Arthritis
52	Male	44.6907	13.3531		38.2139	Negative		Negative	Positive		Positive	131.659	71.8024	Rheumatoid Arthritis
24	Male	44.7073	18.2112	34.7573		Positive	Negative	Negative	Negative	Positive	Positive		43.5804	Rheumatoid Arthritis
75	Male	30.8561	13.8381	23.7759		Negative	Positive	Negative	Positive	Positive			34.8813	Rheumatoid Arthritis
42	Male	36.3		24.5239		Positive	Negative	Positive	Positive	Positive	Negative	192.425	23.4334	Rheumatoid Arthritis
35	Male	39.8263	23.9128	36.2507		Positive		Positive				173.45	13.3768	Rheumatoid Arthritis
37	Female	38.9217	27.7337	26.3009	25.3195		Positive	Positive	Negative			102.912	55.6094	Rheumatoid Arthritis
31	Male	32.6361	16.5698	22.7503		Positive	Positive	Negative	Negative	Positive	Negative	178.009	32.2786	Rheumatoid Arthritis
70	Male	36.2238		26.5861	36.9449	Negative	Positive	Negative				131.622		Rheumatoid Arthritis
52	Female	31.9762	17.8825	32.6581	31.752	Negative		Negative	Negative	Positive		88.3968	51.1462	Rheumatoid Arthritis
24	Male	31.3694	15.2063	35.137		Positive	Negative	Negative	Positive			96.8366	37.2662	Rheumatoid Arthritis
66	Male	27.647	17.6419	33.6015		Negative		Negative	Positive			175.134	63.1394	Rheumatoid Arthritis
37	Female	26.0878	26.3957	38.7003	23.9819		Negative	Positive	Positive		Positive	159.822		Rheumatoid Arthritis
71	Male	31.1313	24.3078	22.2684	36.8387		Positive	Negative	Negative	Positive	Positive	134.838	28.7732	Rheumatoid Arthritis
71	Male	30.5197		29.7773	26.903	Negative		Positive	Positive	Positive		165.601	70.1488	Rheumatoid Arthritis
75	Male	36.2363	29.2375	38.5148	31.2514			Positive	Positive	Positive	Positive	106.434	47.6469	Rheumatoid Arthritis
48	Female	46.6607	11.5663	39.7814		Positive	Positive	Positive				169.99	46.8409	Rheumatoid Arthritis
51	Female			25.6931	31.4117	Positive	Positive	Negative	Positive	Negative		98.6465	39.9337	Rheumatoid Arthritis
63	Female	39.9765	21.5872	25.7964	21.2336	Positive	Positive	Negative	Positive	Positive		109.986	20.862	Rheumatoid Arthritis
32	Female	32.4049	28.5843	31.3695	31.1815	Positive		Negative	Positive	Negative		144.052		Rheumatoid Arthritis
58	Male	30.0758	27.4377	25.8564	36.6747	Negative		Negative		Negative		198.515	24.8575	Rheumatoid Arthritis
46	Female	34.3794	24.4942	23.6134		Positive	Positive	Negative		Positive		146.613	62.4959	Rheumatoid Arthritis
50	Male	46.447	21.7673	31.437	25.1169	Negative		Negative	Positive	Negative		93.2802		Rheumatoid Arthritis
37	Female	26.4517		28.0596	30.3163	Positive	Positive	Positive	Negative	Negative	Positive	176.446	47.9684	Rheumatoid Arthritis
61	Female	34.7431	16.5627	30.279					Negative			132.062		Rheumatoid Arthritis
21	Female	32.9655		23.4424	24.7745	Positive			Negative	Positive	Negative	111.517	60.9953	Rheumatoid Arthritis
69	Female	43.9014	14.4453	36.3189	24.715	Negative	Negative	Positive	Negative			121.811	19.9028	Rheumatoid Arthritis
57	Female	29.6081		36.2028	29.662	Negative	Positive			Positive	Positive			Rheumatoid Arthritis
61	Female	31.2432	28.602	32.7431		Positive	Positive		Positive	Positive		128.564	58.2604	Rheumatoid Arthritis
35	Female	29.4183	22.7058	31.3278			Positive	Positive	Positive	Negative		110.499	21.1454	Rheumatoid Arthritis
44	Female	28.8369		29.8378		Negative	Negative	Positive	Negative			135.563		Rheumatoid Arthritis
32	Male	44.8491	16.7623	31.4772	32.8027	Negative			Positive	Negative	Negative	95.735	20.636	Rheumatoid Arthritis
26	Male		13.8004	31.6777	32.3397		Negative			Negative	Positive	112.654		Rheumatoid Arthritis
41	Male	44.5228	17.9936	26.3764	28.7878	Positive	Negative	Positive		Positive		93.5237	42.515	Rheumatoid Arthritis
71	Female		21.0394	36.7817	31.7258	Positive		Positive	Negative	Negative			24.2464	Rheumatoid Arthritis
77	Female	37.5538		25.5931	27.8761	Positive		Negative	Positive	Positive			41.0759	Rheumatoid Arthritis
54	Male	34.3335	27.0202	38.7355	37.488	Negative	Positive	Negative		Negative	Positive		32.7919	Rheumatoid Arthritis
21	Female	37.9255	22.4303	28.676				Positive	Negative			164.75	69.3866	Rheumatoid Arthritis
60	Male	26.6895	23.8555	27.2841	34.3578				Negative	Positive	Negative	199.949	24.7725	Rheumatoid Arthritis
31	Female	27.2605	28.4973	37.813		Negative	Negative	Positive	Negative		Negative	97.8849	28.0832	Rheumatoid Arthritis
50	Female		26.25	35.3298	38.7579		Negative	Negative		Negative	Negative	123.127	42.5907	Rheumatoid Arthritis
66	Female	30.4001		34.4412	36.7639	Negative	Positive	Negative	Positive	Negative	Positive	136.315	18.3775	Rheumatoid Arthritis
41	Male	43.1535	19.9367	33.0093		Negative			Positive	Positive		204.966		Rheumatoid Arthritis
25	Male	29.0337	23.8726	26.5699	36.9195	Negative	Positive	Positive		Negative		167.76		Rheumatoid Arthritis
79	Male	46.3712	28.4277	33.3414	39.5388	Positive	Positive	Positive	Positive		Negative	117.003	63.7619	Rheumatoid Arthritis
72	Male	29.6483	27.7854		31.8309	Positive	Positive	Positive		Negative		135.081		Rheumatoid Arthritis
24	Female		26.8592	39.7983	27.9746	Negative		Negative	Negative	Negative			62.8726	Rheumatoid Arthritis
31	Female	35.3527	18.125	24.9915	33.925	Negative	Negative	Negative	Negative	Negative	Positive	106.106	15.8595	Rheumatoid Arthritis
38	Male	35.2659			39.1397	Negative	Positive	Negative	Positive			148.413	59.2477	Rheumatoid Arthritis
71	Female	29.6898	23.7258	25.7727					Negative	Negative	Negative			Rheumatoid Arthritis
20	Female	26.8259		34.5784			Positive	Positive	Positive	Negative	Negative	160.134	46.9242	Rheumatoid Arthritis
80	Male	30.2234	28.4445	24.0884	26.2895	Positive	Negative	Negative		Positive	Positive	172.203	59.3626	Rheumatoid Arthritis
50	Female	34.8593	13.6873	31.0336	30.9329	Positive	Positive	Negative		Negative			55.5043	Rheumatoid Arthritis
32	Female	28.4166		25.7319		Positive		Negative		Negative	Negative	127.057		Rheumatoid Arthritis
58	Female	26.7092	17.8122	28.46	31.8855	Negative		Positive	Positive	Positive		90.7779	71.0808	Rheumatoid Arthritis
52	Female	36.1819	22.0814	38.8639		Negative	Positive	Negative				187.951	71.9603	Rheumatoid Arthritis
54	Female	43.6564	17.915	28.1031	28.5238	Positive		Positive	Negative		Positive	151.63	23.4182	Rheumatoid Arthritis
60	Female	35.886		30.1771	31.3059	Negative	Negative	Positive		Negative			27.0539	Rheumatoid Arthritis
69	Male	42.9125	23.1639	34.5288	33.3412	Negative		Positive	Negative			197.611		Rheumatoid Arthritis
69	Male	33.121	15.1144	35.7971	22.8247	Negative	Positive		Negative			137.282	40.6881	Rheumatoid Arthritis
33	Female	42.8671				Negative		Positive	Negative	Positive	Positive			Rheumatoid Arthritis
77	Male	43.3049		26.1685	25.4706	Positive		Negative		Positive		157.448	37.1232	Rheumatoid Arthritis
66	Male	30.4778	15.5167	26.688	22.2117	Negative			Negative	Negative		149.125	46.5786	Rheumatoid Arthritis
23	Male	40.9551	16.4978	26.9933	31.2472		Positive			Negative	Positive	122.505	68.3634	Rheumatoid Arthritis
21	Male	30.5829	24.9287	38.6964	33.1331	Positive	Negative	Negative	Positive		Positive	152.952	17.715	Rheumatoid Arthritis
48	Male	31.3662	17.962	33.7346		Negative	Positive	Negative	Positive	Positive		137.859	27.8565	Rheumatoid Arthritis
68	Female		13.0998	34.7249	22.9478	Negative	Negative	Negative				162.233	39.4165	Rheumatoid Arthritis
45	Male	34.5424	18.176	21.5702	26.6594	Negative	Positive		Positive	Negative	Negative	165.403	30.151	Rheumatoid Arthritis
54	Male	34.5477	17.8926	31.2398		Negative	Positive		Negative		Negative	166.936	21.5134	Rheumatoid Arthritis
73	Female	36.2052	24.4784	27.2573	28.1576	Negative	Positive	Positive	Positive	Negative		197.2	68.0924	Rheumatoid Arthritis
39	Male	48.3559	21.6127	37.5198	37.279	Negative	Positive	Positive	Negative	Negative		101.56	59.9065	Rheumatoid Arthritis
73	Male	27.9977	29.6012	28.2652	39.1915				Negative	Negative		187.845	48.3904	Rheumatoid Arthritis
53	Female	35.6452	26.1065	24.1482	22.5604	Positive	Positive	Negative	Negative		Negative		61.0788	Rheumatoid Arthritis
44	Female	27.85	12.2519	30.5703	30.0291	Negative		Positive	Negative	Positive		184.557	33.6999	Rheumatoid Arthritis
57	Female	33.6205		31.7725	26.6154	Negative		Negative	Negative			120.321	64.1152	Rheumatoid Arthritis
31	Male	37.5092	21.7317	25.8016		Positive	Positive	Positive				137.238	38.2998	Rheumatoid Arthritis
26	Male	38.7477		34.415		Negative	Negative	Negative	Positive	Negative	Negative	99.3442	36.325	Rheumatoid Arthritis
21	Female	40.5628	24.4621	34.2797	33.534	Positive		Positive			Positive			Rheumatoid Arthritis
36	Female	36.0858	21.9095	35.5873	27.1931	Positive			Positive	Negative	Negative		20.5382	Rheumatoid Arthritis
25	Male	49.4925	11.5667	26.6623			Positive	Positive	Negative			191.163	40.9963	Rheumatoid Arthritis
72	Female		21.6909	30.4136	38.9339	Negative	Positive		Positive	Positive		143.759	17.0386	Rheumatoid Arthritis
61	Male	39.4499	29.321	24.7984	24.9299	Positive			Positive		Negative	122.995	45.2154	Rheumatoid Arthritis
48	Female	30.0702	29.9315	38.4211	37.0692	Positive			Positive	Positive		174.443		Rheumatoid Arthritis
75	Male	49.9507		22.3622	35.6046	Negative	Positive	Negative	Negative	Negative		90.3131		Rheumatoid Arthritis
41	Female	41.9713		30.3741	37.6517	Positive	Positive	Positive	Negative		Negative		55.5998	Rheumatoid Arthritis
53	Female	42.6859		30.3251	37.7901	Negative	Negative	Negative	Positive	Positive			67.3582	Rheumatoid Arthritis
64	Female	28.3288		23.8465	27.9361	Positive	Negative	Positive	Negative		Positive	107.705	66.2483	Rheumatoid Arthritis
80	Female	35.8702	19.2049	37.9166	21.2918	Positive		Positive		Negative	Negative	105.736		Rheumatoid Arthritis
53	Female	30.272	14.8627	29.2078		Negative	Positive	Positive	Negative		Positive	122.944	24.3881	Rheumatoid Arthritis
23	Female	33.9094	17.7825	22.3651		Negative	Positive		Positive		Negative	131.083	27.1739	Rheumatoid Arthritis
56	Male		21.9514	31.0155	23.487	Negative	Negative	Negative	Negative	Positive	Positive	162.784	37.2175	Rheumatoid Arthritis
29	Male	35.7856	22.9466	30.72	24.8404	Positive			Positive	Positive	Positive		67.664	Rheumatoid Arthritis
43	Male	42.9757	20.021	28.449	31.9785	Negative	Positive	Positive	Negative	Negative	Positive	147.652	38.476	Rheumatoid Arthritis
63	Male	35.1397	20.8634	33.9008	31.0367	Negative	Positive	Positive	Positive		Negative	151.444	19.4503	Rheumatoid Arthritis
71	Male		15.0313	35.7641	23.4351	Negative	Negative		Negative	Positive	Negative	189.763	46.9668	Rheumatoid Arthritis
22	Female		26.9381	30.8524	36.4948	Positive		Negative	Negative	Negative		155.602	53.7222	Rheumatoid Arthritis
70	Female	30.8154	11.1413	26.3687	39.5942	Positive	Negative	Positive	Negative	Positive		90.2899		Rheumatoid Arthritis
47	Male	28.4018	20.2814	24.7387	38.7971	Positive	Negative		Positive	Negative		158.804	27.8525	Rheumatoid Arthritis
40	Female	39.8206	18.2847		30.3419	Negative	Positive	Positive	Negative	Negative		153.572	47.9342	Rheumatoid Arthritis
80	Female		11.7641	28.7431	34.6803	Positive		Positive	Negative		Positive	149.335		Rheumatoid Arthritis
24	Female	29.1162		29.7376	22.3306	Negative		Positive	Positive		Negative	157.81		Rheumatoid Arthritis
23	Female	40.2859		25.3642		Positive	Negative		Positive		Negative	179.653	53.7829	Rheumatoid Arthritis
51	Male	35.5394	11.463	21.9474	26.4641	Positive						178.56	46.1171	Rheumatoid Arthritis
28	Female	26.3429	19.3111	33.3206		Negative	Positive		Negative	Negative	Positive	146.611	13.2534	Rheumatoid Arthritis
35	Female			37.6667	34.3962	Positive	Negative	Positive	Positive	Negative	Positive	121.053	18.0749	Rheumatoid Arthritis
47	Female	37.5304	16.445	28.6543	22.4885	Negative		Negative	Positive	Positive		134.082	44.9726	Rheumatoid Arthritis
51	Male	37.5359	27.2894	36.26	29.9116	Negative	Positive		Positive	Negative	Positive	187.019	61.6931	Rheumatoid Arthritis
22	Male		11.6002	21.2845	39.8653			Positive	Positive	Positive			54.963	Rheumatoid Arthritis
55	Female	31.7911	25.1836	21.0314	36.1108	Negative	Negative	Positive	Positive	Negative	Negative	97.045	21.4754	Rheumatoid Arthritis
53	Male	38.552		38.3419	21.5958	Positive	Negative		Positive	Positive	Positive	101.302		Rheumatoid Arthritis
47	Male	29.3407	25.5133			Negative	Negative		Negative		Positive	159.198	58.7796	Rheumatoid Arthritis
58	Male	32.7296	26.5817	31.5867	21.7069	Negative	Negative	Negative		Positive	Negative	131.005	35.6346	Rheumatoid Arthritis
29	Male	37.2613	22.3358	39.6833	38.5481	Negative	Positive	Negative	Positive		Positive	191.609		Rheumatoid Arthritis
37	Male	36.2856		30.2155	32.9184	Negative	Negative			Negative	Positive	156.726	66.8186	Rheumatoid Arthritis
35	Female	39.6323	13.4845	23.8597	32.6968	Positive	Positive	Negative		Positive	Negative	116.024	25.9114	Rheumatoid Arthritis
70	Male	38.9009	19.4792	21.2533	26.6564	Positive	Negative	Negative	Negative	Positive	Positive	147.3	45.3673	Rheumatoid Arthritis
51	Male	43.1807	14.6414	25.3506	36.9403	Positive	Positive	Negative	Positive	Positive			65.1501	Rheumatoid Arthritis
43	Female	34.7197	12.6884	29.8134	22.424	Positive		Positive		Negative		162.536	53.7077	Rheumatoid Arthritis
76	Female	36.293	21.5988	38.4455		Negative			Positive		Negative		68.9876	Rheumatoid Arthritis
26	Male			37.5309	26.4146	Positive	Negative	Negative	Negative			129.754		Rheumatoid Arthritis
29	Male	33.3164	11.8814		25.0805	Negative	Positive	Negative	Positive	Negative	Negative	93.8929	47.9884	Rheumatoid Arthritis
34	Female	35.2054	28.1702	24.9679	29.9175	Negative	Negative	Positive	Negative		Negative	158.096	64.1287	Rheumatoid Arthritis
30	Male	32.0624		24.4212	37.0845		Negative	Positive	Positive		Negative	146.971		Rheumatoid Arthritis
52	Female		27.0677	26.0669		Negative	Negative					107.148	32.2995	Rheumatoid Arthritis
69	Male	29.8564	28.3507	26.7002	24.9304		Negative	Negative	Negative	Positive	Positive	161.024		Rheumatoid Arthritis
74	Female	43.3535	21.8863	22.9315	32.6016		Positive	Negative		Negative		104.728	13.0852	Rheumatoid Arthritis
77	Female	29.9992	13.1405	28.7209		Positive	Positive			Positive	Negative	168.319		Rheumatoid Arthritis
37	Male	28.3275	15.4656	33.7715		Positive	Negative	Negative	Positive	Positive	Negative	179.277	16.673	Rheumatoid Arthritis
36	Male	49.2898	29.044	33.4796	29.6973	Positive	Negative					196.805	17.4195	Rheumatoid Arthritis
66	Male	31.6101	26.8173	21.5336	35.091		Positive	Negative	Positive	Negative	Negative	204.512		Rheumatoid Arthritis
22	Female	37.3789	27.1063	27.3118		Negative		Negative	Negative	Negative	Negative	157.184	19.65	Rheumatoid Arthritis
78	Female	36.5665	28.994	35.8996	25.1148		Negative	Negative	Positive	Negative	Positive	184.163	33.1141	Rheumatoid Arthritis
80	Female		18.3056	28.2088	28.8561	Negative		Negative	Positive	Negative		123.741	13.5488	Rheumatoid Arthritis
73	Male	33.0999		31.2587	31.6487	Positive		Negative	Positive		Positive	141.202		Rheumatoid Arthritis
45	Male	27.2754	12.6603	38.3491			Positive	Negative	Negative		Positive	118.353		Rheumatoid Arthritis
35	Male	26.5066	22.2913	35.1662		Negative	Negative	Positive	Positive		Positive	156.253	59.0767	Rheumatoid Arthritis
77	Male	28.43			34.4299	Negative		Positive	Negative	Negative	Negative	142.804	17.4204	Rheumatoid Arthritis
43	Male		18.866	39.5214	37.555	Negative			Negative	Negative		126.1	19.2084	Rheumatoid Arthritis
48	Male	34.793		35.518	23.7402	Positive		Negative	Positive		Positive	195.097	63.327	Rheumatoid Arthritis
20	Female	40.9977	15.9771	29.0077	22.3977			Positive			Negative	124.924	32.1914	Rheumatoid Arthritis
25	Male	49.5644	27.7235	31.4677	35.7276	Positive		Negative		Positive		168.291		Rheumatoid Arthritis
28	Male	38.0162	16.2608	27.3439	33.997	Negative	Negative		Positive		Negative		46.2165	Rheumatoid Arthritis
63	Male	47.4107	21.0951	33.6863	38.7866		Negative	Negative	Positive			185.635	52.0177	Rheumatoid Arthritis
63	Male	42.4868	21.6003	38.0331	22.7601	Negative	Positive	Negative	Positive	Positive		185.195		Rheumatoid Arthritis
28	Female	36.3894	22.9498	22.4983	33.76	Positive	Negative	Negative	Negative	Positive	Negative	189.319		Rheumatoid Arthritis
28	Female	26.9344	18.5753		36.769	Positive	Positive	Negative		Negative		153.097	19.7513	Rheumatoid Arthritis
27	Female	35.1328		32.9887		Positive		Positive	Negative		Positive	175.723	48.2313	Rheumatoid Arthritis
77	Female	35.178	26.9045	28.8068	35.4466		Positive	Negative					39.0865	Rheumatoid Arthritis
34	Female	34.2143	12.461	34.0912	27.2143	Negative		Negative	Positive		Positive	117.496	39.5811	Rheumatoid Arthritis
66	Male		20.5125	32.9374		Negative		Negative	Positive		Positive	120.892	43.7278	Rheumatoid Arthritis
30	Male	37.7546	14.7745		33.7448		Negative	Positive				165.803	45.3003	Rheumatoid Arthritis
46	Male	36.6012	12.6137	25.6807	28.6591				Positive		Positive	161.147	19.8532	Rheumatoid Arthritis
40	Female			38.0124	38.4291	Negative	Positive		Negative		Positive	146.508	28.1845	Rheumatoid Arthritis
68	Male	36.4858	14.6413	25.8637	36.904	Positive	Positive	Negative	Negative	Positive	Positive	162.316	15.1421	Rheumatoid Arthritis
20	Male		12.6145	36.5994	23.2497	Negative	Positive	Positive	Negative	Negative	Positive	159.6		Rheumatoid Arthritis
40	Female	36.9109	26.4972	36.6522	27.5405	Negative		Negative			Positive	129.556		Rheumatoid Arthritis
63	Male	37.0541	23.2739	22.2369	32.5241	Negative		Positive	Positive	Negative		115.153	43.6508	Rheumatoid Arthritis
49	Male	39.4792	12.7822	32.916	27.712	Positive	Positive	Positive		Negative	Negative	114.677	18.6654	Rheumatoid Arthritis
38	Female		29.2084	23.121	25.1203	Negative	Negative	Negative	Negative	Negative		155.724	64.9715	Rheumatoid Arthritis
33	Female	30.1716	17.1071		38.9048	Negative	Negative	Negative			Negative	149.411	51.2358	Rheumatoid Arthritis
63	Male	34.2077	19.4779			Positive		Negative		Negative		131.937		Rheumatoid Arthritis
71	Female	45.7792			34.8802	Negative	Negative	Negative				169.914	60.5615	Rheumatoid Arthritis
43	Male	30.2902		30.4982	38.2328	Positive	Negative	Negative	Positive	Positive		111.295	25.5817	Rheumatoid Arthritis
44	Female	38.8565	29.1701	31.5291	23.5973	Negative	Positive	Positive	Negative			123.863		Rheumatoid Arthritis
55	Female		21.4558		25.9035	Positive			Positive		Positive	95.1543		Rheumatoid Arthritis
20	Female	32.6876	29.0106	36.433	38.5327	Negative			Positive	Negative		171.385	42.6774	Rheumatoid Arthritis
61	Female	29.751	20.8859	36.16	27.0242	Positive		Negative		Positive	Negative	113.661	57.7338	Rheumatoid Arthritis
26	Male	37.9406	19.9405		27.723	Negative	Positive	Positive	Positive		Negative	138.754	44.4337	Rheumatoid Arthritis
35	Female	42.0669	18.799	35.0418	31.9571		Negative		Negative	Negative	Negative	136.378	72.3181	Rheumatoid Arthritis
69	Male	26.6771	16.5752	21.3369	35.6723	Negative		Negative			Positive	101.769	25.1901	Rheumatoid Arthritis
68	Male	30.1141	21.9286	24.1485	26.9202	Positive	Negative	Positive			Positive	143.468	63.8147	Rheumatoid Arthritis
23	Male	28.5035	16.858	33.0879	23.4561	Negative			Negative	Positive		178.661	45.9744	Rheumatoid Arthritis
23	Female		28.7337	26.8739	24.0188	Negative	Positive		Positive	Positive		127.655	47.1131	Rheumatoid Arthritis
74	Female	33.6944	18.1848	29.4061	25.9993	Negative	Positive	Negative	Negative			106.29	16.9029	Rheumatoid Arthritis
76	Male	32.1548	12.1995	36.0078	25.3661	Negative	Positive		Negative	Positive		155.01		Rheumatoid Arthritis
46	Female	27.2663	25.9063	36.279				Positive	Positive	Negative	Negative	142.863	19.8768	Rheumatoid Arthritis
26	Female	35.033	16.6042	24.1442		Positive	Negative	Negative	Positive	Negative	Positive		33.6474	Rheumatoid Arthritis
68	Male	39.278		35.252		Positive	Positive				Negative	152.837	49.2375	Rheumatoid Arthritis
50	Male		28.8199	38.717	38.8365		Positive	Positive	Negative	Positive	Negative	189.5	31.5845	Rheumatoid Arthritis
72	Female	46.1602	25.0474	36.7046		Negative		Negative	Positive			149.367		Rheumatoid Arthritis
23	Male	27.5538		31.0475		Negative	Negative	Negative	Negative	Positive	Positive		35.5121	Rheumatoid Arthritis
38	Female	34.6437	20.1648	37.1401	33.2751			Positive	Positive			149.099	18.0068	Rheumatoid Arthritis
54	Male	43.6796	25.375	24.5319	36.6834		Negative	Negative	Positive	Negative		114.08	46.5243	Rheumatoid Arthritis
70	Female	28.4062	17.3349			Negative	Negative	Positive	Positive		Positive	131.813	20.2388	Rheumatoid Arthritis
56	Male	30.2991	12.9492	25.2403	36.0504	Negative	Positive	Positive	Positive	Positive		151.8	13.4468	Rheumatoid Arthritis
50	Male	31.2066		23.2494	36.2021	Negative		Negative			Positive	162.684	13.818	Rheumatoid Arthritis
80	Female	26.3447	19.4126	25.4825	29.2079	Negative	Positive	Negative	Negative			171.546	50.5784	Rheumatoid Arthritis
39	Female	36.9237	19.1982			Positive		Positive	Positive	Negative	Negative	172.879	33.5736	Rheumatoid Arthritis
59	Female	33.8255		25.9542	26.7235	Positive			Negative		Negative	96.9621	56.9878	Rheumatoid Arthritis
34	Male	38.9318	28.4472	34.9671	24.307			Positive	Positive		Positive	158.372	41.9607	Rheumatoid Arthritis
45	Male	30.0001	14.1972	37.7771	35.1203	Negative	Negative	Negative	Positive		Negative	159.932	45.9452	Rheumatoid Arthritis
24	Male	33.2474	28.6431	31.7007	27.4451	Positive	Positive	Positive	Positive	Negative	Positive	143.951	59.973	Rheumatoid Arthritis
22	Female	29.1793	11.9547	25.7206	23.9733	Positive		Positive	Positive		Positive		71.319	Rheumatoid Arthritis
57	Male	32.1942	16.1422	24.1332	26.2011	Positive	Negative		Negative	Positive		162.5	66.9861	Rheumatoid Arthritis
48	Male	44.4092	24.3335	31.2956		Negative	Positive		Negative	Negative		119.239	60.5548	Rheumatoid Arthritis
40	Female	40.8805	18.4477		21.6442	Negative		Negative	Negative			142.737		Rheumatoid Arthritis
78	Female		24.3011	23.0233	34.1357		Negative	Negative		Positive		124.11	29.5403	Rheumatoid Arthritis
79	Female	39.6656	23.906		32.6339	Positive	Negative		Positive	Negative	Positive	159.225	36.0465	Rheumatoid Arthritis
59	Male	28.2249	16.875	30.3143	24.9106	Positive		Negative	Positive		Positive	105.456		Rheumatoid Arthritis
26	Male	28.6625	17.8134	22.6723	22.8072	Positive	Negative	Positive	Positive	Positive		126.681	43.0635	Rheumatoid Arthritis
38	Female		18.5234	31.0408	29.4348	Positive		Negative	Positive	Negative		155.763	38.9262	Rheumatoid Arthritis
54	Female	44.2446	23.129	22.714	39.7588	Negative	Positive	Positive				155.659		Rheumatoid Arthritis
32	Female	31.82		30.8864	34.5289			Positive	Positive			91.3107	55.3411	Rheumatoid Arthritis
46	Male	29.9431	12.2337	34.1775	24.0581			Positive					37.643	Rheumatoid Arthritis
22	Male	45.6365		28.4807			Positive	Positive		Positive	Negative	132.872	29.1372	Rheumatoid Arthritis
30	Female	29.0847	13.5088	25.9128	28.1216	Positive	Positive	Negative	Negative	Positive	Negative	115.874	13.6592	Rheumatoid Arthritis
42	Male	32.0845	26.8583	38.115		Negative	Positive		Negative	Negative		169.987	45.9844	Rheumatoid Arthritis
35	Female	34.9888	11.6917	25.9457	34.2947	Positive	Negative	Positive	Positive	Positive		135.956	21.1627	Rheumatoid Arthritis
32	Male	32.0627		24.39	26.5359		Positive					168.214	69.7203	Rheumatoid Arthritis
43	Male	39.3928	11.4837	38.8856	29.9387	Negative	Positive	Positive	Negative		Positive	156.913	57.4845	Rheumatoid Arthritis
41	Female	29.6046	22.3907	33.007	27.837	Negative		Positive	Positive			99.5517	13.6042	Rheumatoid Arthritis
38	Female	36.8491		23.2421				Negative	Positive	Negative	Negative	105.931	17.0821	Rheumatoid Arthritis
48	Male	38.7457		35.4112		Negative	Negative	Positive	Negative	Negative	Positive	155.641	70.1109	Rheumatoid Arthritis
54	Female	32.3164	22.4088	21.0047	36.9972			Positive				129.889	60.1185	Rheumatoid Arthritis
63	Female	44.7856	17.1559	37.2168		Positive	Negative		Positive	Positive	Negative	193.294		Rheumatoid Arthritis
62	Male		15.6441	29.8233	37.5716	Negative		Negative	Negative	Negative	Negative	199.875	53.0281	Rheumatoid Arthritis
69	Female	29.5903	17.503	22.349	35.5099	Positive	Positive	Negative	Positive		Positive	201.489	40.5671	Rheumatoid Arthritis
66	Female	47.4829		27.6795	31.2229	Negative	Positive	Negative		Negative		134.34	70.0046	Rheumatoid Arthritis
58	Female	31.1322	13.6013	27.0942	25.7188	Negative			Negative	Negative	Negative	160.738	42.3502	Rheumatoid Arthritis
75	Male	27.7216	13.842			Positive	Positive		Positive	Negative		144.156	65.9025	Rheumatoid Arthritis
33	Male	32.3812		26.7105	25.3088	Positive	Negative	Negative	Positive		Negative	184.863	14.7128	Rheumatoid Arthritis
40	Male	33.9994	15.6044	36.5443	39.8453	Positive		Positive	Positive		Negative	100.423	61.3811	Rheumatoid Arthritis
26	Male	28.6975	16.1386			Positive	Positive	Positive	Negative		Negative	116.171	16.0616	Rheumatoid Arthritis
59	Male	26.5505		27.3208	25.4857	Positive	Negative	Negative	Positive	Positive		163.11	71.8985	Rheumatoid Arthritis
30	Female	31.4048	20.3429	31.9565		Negative	Positive	Negative	Positive	Positive	Positive	101.316	44.3454	Rheumatoid Arthritis
46	Male	43.9237		36.9819	32.8503	Positive	Negative	Positive	Negative	Negative			19.4613	Rheumatoid Arthritis
41	Female	38.0584		37.9254	37.3065		Negative	Negative	Positive			119.859	32.3793	Rheumatoid Arthritis
75	Male	26.159	18.9375	37.0169	30.0667	Negative	Positive	Positive			Negative	137.633	32.486	Rheumatoid Arthritis
64	Female	45.523		31.8229	27.5378	Positive	Negative					165.347	40.7395	Rheumatoid Arthritis
32	Male	37.1403		30.1217	27.4828	Positive	Positive	Negative	Positive	Positive	Negative	146.042	35.0682	Rheumatoid Arthritis
66	Female	41.2707	28.939	34.9457	37.7997	Negative			Positive			123.56	40.1935	Rheumatoid Arthritis
46	Female	41.9921	24.8935	23.7377	30.7921	Negative	Positive	Positive			Positive	198.49		Rheumatoid Arthritis
56	Male	31.1049	25.4953	36.444		Negative	Negative	Negative	Negative	Positive			23.8782	Rheumatoid Arthritis
59	Male	35.0228		21.3594	36.7567	Negative	Negative	Positive	Negative	Negative	Negative		56.6292	Rheumatoid Arthritis
42	Female		18.8172	24.4427	21.1083	Negative		Negative	Positive	Positive	Negative	205.477	35.1428	Rheumatoid Arthritis
21	Female	29.3479	29.3977	37.4655	26.6176	Positive	Positive	Negative	Negative			126.102	38.1793	Rheumatoid Arthritis
20	Male	45.9479	28.0799		38.4183		Positive	Positive		Negative	Positive	183.497	57.8219	Rheumatoid Arthritis
45	Male	36.4432	27.0979	30.3719	27.0188	Negative	Positive	Negative	Positive		Positive	99.7565	59.9125	Rheumatoid Arthritis
52	Male	32.2475		24.4378	23.5636	Negative	Negative				Positive	141.704	22.0305	Rheumatoid Arthritis
32	Male	38.8413	22.8509	35.8932		Negative	Positive	Positive	Negative			159.09	28.3522	Rheumatoid Arthritis
61	Female		13.487	34.7619	24.0304	Negative	Negative	Negative	Positive			112.928	71.9953	Rheumatoid Arthritis
40	Female	34.5652	24.012		36.3212	Negative			Negative			178.883	42.6584	Rheumatoid Arthritis
79	Female	34.5699	14.2421	25.6261	22.3629	Negative	Negative	Positive	Negative	Positive		151.215	57.6977	Rheumatoid Arthritis
59	Female	38.8818			22.3284	Positive	Positive	Positive					46.5595	Rheumatoid Arthritis
68	Female	34.5185	29.5375	23.4105		Negative			Positive	Positive		131.052		Rheumatoid Arthritis
65	Male	38.277		36.734		Positive		Positive		Negative		177.467	39.9263	Rheumatoid Arthritis
47	Female	34.3401	22.0892		33.6799	Negative	Positive	Negative	Positive	Negative		124.117	52.4562	Rheumatoid Arthritis
39	Male			22.4833	24.3568	Positive	Negative	Negative	Positive		Positive	153.446	36.8484	Rheumatoid Arthritis
20	Male	27.672	15.93		22.5053	Negative	Negative		Negative	Negative	Positive	154.666	49.437	Rheumatoid Arthritis
60	Female	48.0644	20.3676	34.6589	39.5756	Negative				Positive		93.0229	22.53	Rheumatoid Arthritis
62	Female		21.7706	31.0519	33.5231	Positive	Negative	Negative		Negative		148.882		Rheumatoid Arthritis
21	Female	32.6639	13.1899	22.1786		Positive	Positive	Negative	Positive			156.259	68.3217	Rheumatoid Arthritis
26	Male	43.5959		33.7074	38.9601			Negative	Positive				53.894	Rheumatoid Arthritis
78	Male	28.533	11.3468	21.953	36.1163	Negative	Positive	Positive	Negative				25.4355	Rheumatoid Arthritis
63	Male	37.684	11.4198	33.0759	39.9515			Positive				155.079	29.3382	Rheumatoid Arthritis
38	Male	30.5206	27.2354	21.4693	28.7188	Positive		Positive	Positive	Negative		161.201	29.5228	Rheumatoid Arthritis
70	Male	44.7186	25.9809	30.9173		Positive		Positive		Positive	Negative	165.41	21.2809	Rheumatoid Arthritis
64	Male	36.4576	18.2939	25.7371	27.2137	Positive		Negative	Positive	Positive		202.612	36.0866	Rheumatoid Arthritis
22	Male	35.0895			26.6666			Positive	Positive			91.726	50.1925	Rheumatoid Arthritis
23	Male	31.1627	15.9751	27.9727	22.0173	Positive	Negative	Negative		Positive		202.228	38.9987	Rheumatoid Arthritis
25	Female	31.5157	29.2073	22.1006		Positive	Negative	Negative				195.921	26.3077	Rheumatoid Arthritis
58	Female	38.3106	16.8726	39.5652	32.4919		Negative	Positive		Negative	Positive	157.991	16.5593	Rheumatoid Arthritis
37	Female	43.0136	14.9783	23.5881	33.0562	Positive		Positive	Positive	Positive	Positive	164.236	31.2701	Rheumatoid Arthritis
28	Female	48.9421	22.3768	24.6003	22.518				Negative	Positive		172.831	36.9601	Rheumatoid Arthritis
23	Male	48.7151		21.5224		Positive	Negative	Positive			Negative		22.1203	Rheumatoid Arthritis
42	Male	47.2405	14.1508		35.9672	Negative	Negative	Positive	Positive	Positive	Positive	156.165	54.8627	Rheumatoid Arthritis
47	Male	46.8367	29.8715	23.7894	36.736	Positive	Positive	Positive	Positive		Positive	143.397	59.6898	Rheumatoid Arthritis
41	Male	49.7329	19.4151	31.6945	27.1788	Positive	Negative	Negative	Negative	Negative	Positive	172.64	15.9295	Rheumatoid Arthritis
64	Female		22.4474		24.4907	Negative	Positive	Negative		Positive		125.199	16.4926	Rheumatoid Arthritis
51	Female	37.3138	11.9525	25.6071	33.4113	Positive		Negative		Positive	Positive	149.2	26.7649	Rheumatoid Arthritis
20	Male	38.3063		37.0896	26.901	Negative		Negative	Positive	Positive		135.797	14.1979	Rheumatoid Arthritis
40	Male	29.2503		29.396	21.3493	Positive	Negative			Positive		104.824	59.2304	Rheumatoid Arthritis
41	Male	35.7876	21.9664	28.1088	26.7334	Positive	Negative		Positive	Positive	Positive	171.203	39.4863	Rheumatoid Arthritis
35	Male	36.1312		22.9094		Positive	Positive	Positive	Positive		Positive	190.169		Rheumatoid Arthritis
39	Female	30.4411	18.5064	37.5873	35.6379	Negative	Positive	Positive	Positive	Positive	Positive	174.299	35.5329	Rheumatoid Arthritis
43	Female	44.2416	29.6277	26.9531	21.4398	Negative	Negative	Positive			Negative	141.725		Rheumatoid Arthritis
53	Male	32.7889	18.0357	30.5481		Positive		Positive	Negative	Negative		133.595	74.1498	Rheumatoid Arthritis
67	Male	34.9185	21.8898	25.8975	34.4889	Negative	Positive	Negative	Positive	Positive	Negative	147.839	62.3592	Rheumatoid Arthritis
23	Female	29.6919	13.7258	23.8014	37.3349	Positive	Positive	Negative				133.935	60.7369	Rheumatoid Arthritis
69	Female	40.7585		25.3405	28.5659	Positive	Positive	Positive		Positive	Negative	150.434	18.918	Rheumatoid Arthritis
76	Male	47.3924	18.983		24	Negative		Positive	Positive	Negative	Positive	172.372	61.3137	Rheumatoid Arthritis
48	Female	42.289	21.5034	31.2382	22.0821	Negative	Positive			Positive	Positive	168.477		Rheumatoid Arthritis
50	Female	34.7723	21.8379	27.0837		Negative	Positive	Negative	Positive	Positive		122.268	71.3255	Rheumatoid Arthritis
20	Male	32.7726	21.7019	39.1106	25.3912	Negative	Negative	Positive		Positive	Positive		71.7126	Rheumatoid Arthritis
68	Female	48.6111	27.8188	24.5095			Negative	Positive		Positive		115.153		Rheumatoid Arthritis
47	Male	48.7118	28.9117	28.7272		Negative	Negative	Negative	Positive	Positive	Positive	127.076	44.1611	Rheumatoid Arthritis
24	Male	39.5979	12.0074	25.9153		Positive	Negative	Negative	Positive		Positive	132.927		Rheumatoid Arthritis
78	Female	42.4078	21.6032	32.2457	36.5721	Positive	Negative	Negative	Negative	Positive		188.027	36.2979	Rheumatoid Arthritis
46	Male	39.6999	13.3981	33.2157	27.0553	Positive	Negative		Positive	Positive	Negative		34.0972	Rheumatoid Arthritis
45	Female	35.7026			28.2582				Positive	Positive	Negative	101.486	39.7234	Rheumatoid Arthritis
36	Female	36.6103	22.3717	39.3974		Positive	Negative	Positive	Positive			148.172		Rheumatoid Arthritis
24	Female		20.7932	35.8509	32.8799	Negative	Positive		Positive			198.619	37.615	Rheumatoid Arthritis
57	Female	35.4721	23.4536	31.1896	21.1879	Negative	Positive	Negative	Positive	Positive		88.8123	33.0632	Rheumatoid Arthritis
71	Female		15.8297	37.0906	37.3786		Negative	Negative						Rheumatoid Arthritis
36	Male	39.3814	13.9682	26.1753	27.636	Negative	Negative					118.572	69.9128	Rheumatoid Arthritis
22	Male	38.9296	14.0405	37.5867	27.0462	Negative	Negative	Negative	Positive		Positive	97.5155		Rheumatoid Arthritis
31	Male	27.4838		23.374	29.0129		Positive	Positive	Negative	Positive	Positive	130.472		Rheumatoid Arthritis
27	Female			21.568	37.9083			Negative		Positive	Positive	134.663		Rheumatoid Arthritis
61	Female	33.0039	25.4711	30.6033	22.8515	Negative	Negative	Negative	Negative		Negative	102.025	37.3305	Rheumatoid Arthritis
58	Female	34.8311	20.0863	38.328	26.3884	Negative		Positive	Positive	Negative	Negative	90.0978	44.0202	Rheumatoid Arthritis
45	Male	26.0553				Negative	Negative	Positive	Positive		Positive	118.304	20.2135	Rheumatoid Arthritis
32	Male	28.4488	17.3502	38.6921	29.9581	Positive		Positive	Positive		Negative		59.0641	Rheumatoid Arthritis
75	Female	33.8262		28.5118	21.9741		Positive	Negative	Negative	Positive	Negative	203.038	12.5784	Rheumatoid Arthritis
25	Male	39.0491	22.5969	35.6847	22.6706		Negative			Positive	Negative	106.694	30.3514	Rheumatoid Arthritis
32	Male	48.8622	14.1885	37.1377	22.5527		Negative	Positive	Positive	Negative		152.972	38.2867	Rheumatoid Arthritis
58	Male		13.4159			Negative	Positive	Negative	Positive			144.007	29.7767	Rheumatoid Arthritis
54	Female	30.6272		35.8669	39.5195			Negative	Positive	Negative				Rheumatoid Arthritis
73	Male	36.7319		35.7895	36.4367	Negative	Positive		Positive	Negative	Negative	161.486	17.559	Rheumatoid Arthritis
78	Female	28.7237	19.3095	35.6064		Negative	Positive	Negative	Positive			116.702		Rheumatoid Arthritis
56	Female	49.604		30.522	23.52	Positive	Negative	Negative	Negative			102.008	36.6761	Rheumatoid Arthritis
76	Female	33.7514	25.132		36.0053	Positive	Negative		Positive			107.601	60.9402	Rheumatoid Arthritis
73	Female	29.7959	20.8051	33.0089		Negative		Positive	Negative	Positive	Negative		44.5804	Rheumatoid Arthritis
67	Male	26.6533	26.0766	37.5281	36.7508		Negative		Positive	Positive	Positive		31.0849	Rheumatoid Arthritis
28	Female	36.1158	24.7075	27.0673	26.6517	Negative	Positive		Positive		Positive	150.685	53.509	Rheumatoid Arthritis
39	Male	37.8198		38.4636	22.8448	Positive	Positive	Negative	Positive		Positive	120.688	59.0371	Rheumatoid Arthritis
27	Male	36.3319	29.9587	23.7268	28.5772	Positive		Negative	Positive			132.219		Rheumatoid Arthritis
80	Male	32.1026	29.6195	36.7269		Positive	Positive	Positive	Negative	Negative	Positive	115.104	53.8212	Rheumatoid Arthritis
68	Female		20.8345	31.4729	38.8374	Positive		Positive	Positive				51.3928	Rheumatoid Arthritis
80	Female	41.1567		34.1044	37.4707	Negative	Positive	Negative		Negative	Negative	122.721	23.339	Rheumatoid Arthritis
20	Male	28.4918	20.7871	29.2866	33.7634		Negative	Negative	Positive	Negative	Negative	171.613	58.9553	Rheumatoid Arthritis
79	Female	27.5408	18.8222	38.0108	36.4875	Positive			Negative	Positive	Positive		68.9508	Rheumatoid Arthritis
31	Female	35.3162	14.459	34.339	26.7646	Positive	Positive	Positive	Negative			107.606	33.3145	Rheumatoid Arthritis
58	Female	34.5714	17.1785	22.4155		Negative	Negative	Positive				180.365		Rheumatoid Arthritis
42	Female		24.4362	25.7541	37.4761	Negative	Positive		Negative	Negative	Positive	130.898	36.5261	Rheumatoid Arthritis
56	Male	37.3412	27.8404	25.5839			Positive	Positive	Positive		Negative	155.597	72.5375	Rheumatoid Arthritis
53	Male	36.35	13.0627	23.9615	23.5257	Positive	Positive	Positive	Negative	Negative		175.827		Rheumatoid Arthritis
54	Male	27.8878		32.5574		Negative				Positive		170.309	39.6769	Rheumatoid Arthritis
42	Female	38.2629		36.3984	22.4525		Negative		Positive			191.751	47.1373	Rheumatoid Arthritis
55	Male	26.1175		22.6033	35.9409	Negative	Negative	Positive		Positive	Positive	151.78	44.6073	Rheumatoid Arthritis
71	Female	37.0692	17.0943	31.9088	34.8142	Positive	Negative	Positive	Negative	Positive	Positive	174.566	54.574	Rheumatoid Arthritis
63	Female	30.3458	22.7604	36.6177	24.3206	Negative	Positive	Negative	Negative		Positive	188.002	42.4671	Rheumatoid Arthritis
63	Female	29.8115		22.1293		Negative	Negative	Positive	Negative	Positive	Positive	177.874		Rheumatoid Arthritis
32	Female	32.4604	26.8126	21.472		Positive	Negative	Negative	Positive		Negative	119.529	60.8874	Rheumatoid Arthritis
22	Male	42.5232	17.4425	22.3185	30.9303	Negative	Positive		Positive	Negative		193.523	49.7913	Rheumatoid Arthritis
66	Female	33.7531		39.5251	35.7941	Positive	Positive	Positive	Negative	Negative	Negative	118.038	67.0819	Rheumatoid Arthritis
51	Female		18.5346		31.1184	Positive	Positive		Negative	Positive		150.454		Rheumatoid Arthritis
22	Male	36.9281		23.7218		Negative	Positive	Negative		Positive		92.5704	47.2681	Rheumatoid Arthritis
80	Female	32.2597	17.0867	30.8622		Negative			Negative			181.449	49.9913	Rheumatoid Arthritis
25	Female	32.9137	14.476			Positive	Positive	Negative	Negative	Positive			36.7668	Rheumatoid Arthritis
53	Female		20.1438	21.6212	38.7954	Positive	Negative			Positive		132.092		Rheumatoid Arthritis
26	Male	38.088		25.8888	31.5799			Positive	Negative	Negative		145.704		Rheumatoid Arthritis
53	Male	27.806		28.7611	25.6216	Positive	Positive	Positive	Negative	Negative		110.712		Rheumatoid Arthritis
46	Female	39.6799			37.2532	Positive	Negative		Positive	Positive	Negative	113.244	44.2487	Rheumatoid Arthritis
46	Female	33.9709	17.9984	21.5371	23.2122	Negative		Positive	Negative		Positive	127.065	16.5427	Rheumatoid Arthritis
49	Female	49.4871	15.7668	32.6479			Positive			Positive	Negative	149.763		Rheumatoid Arthritis
24	Male	29.1995	18.5762		24.3987	Positive			Negative	Positive		126.959	45.7407	Rheumatoid Arthritis
80	Male	26.8915	12.231	35.8497	23.252	Negative	Positive	Negative			Negative	92.0665	24.6646	Rheumatoid Arthritis
20	Female	26.9898	16.342	21.4204	24.9106	Negative			Positive		Positive	151.221		Rheumatoid Arthritis
20	Male	47.8512	16.3713	31.4008		Positive	Positive	Positive	Positive	Positive	Positive	193.477	41.1106	Rheumatoid Arthritis
51	Male	37.9835	27.193	33.0366	35.743	Negative	Negative	Positive	Positive	Negative		109.022		Rheumatoid Arthritis
52	Male	28.8548	25.4993		28.2391	Positive	Positive	Positive	Positive	Negative	Positive	165.496	29.5382	Rheumatoid Arthritis
42	Male	40.8765	13.2286	31.9854	35.6932	Negative			Negative	Negative	Positive	177.698	71.2076	Rheumatoid Arthritis
22	Female	39.4487		27.5854	24.1461			Positive	Negative	Positive	Negative	170.029		Rheumatoid Arthritis
23	Female	39.2122	11.8321		28.7405		Negative	Positive	Positive	Positive		112.637		Rheumatoid Arthritis
35	Male	38.3633		22.0863		Negative	Positive		Positive	Negative	Negative	141.231	68.5186	Rheumatoid Arthritis
36	Female	31.2246	27.6189	22.9957			Positive	Positive				119.111	56.5451	Rheumatoid Arthritis
42	Male	37.8083	15.4624	23.3509	33.8523	Positive		Negative	Positive	Negative	Positive	96.9675	69.0983	Rheumatoid Arthritis
68	Female	41.6947	26.1467	22.3959	26.6327	Positive		Negative	Negative	Negative	Positive	144.98	57.342	Rheumatoid Arthritis
72	Male	27.2286		29.4968	32.305	Positive	Negative			Positive	Negative		50.8194	Rheumatoid Arthritis
55	Male	49.6483	16.7096	26.4715	23.668	Positive			Negative	Positive				Rheumatoid Arthritis
52	Female	28.4803	27.0221	34.6029	24.4612	Positive	Positive	Positive	Positive		Negative	161.085	34.2099	Rheumatoid Arthritis
63	Male	35.6651	19.0094	36.0151		Negative	Negative	Positive		Positive		137.961	39.1625	Rheumatoid Arthritis
46	Male	26.8219	19.1058	22.0118	36.8479	Positive		Negative	Negative	Positive		125.27	37.7504	Rheumatoid Arthritis
50	Male	28.499	15.3795	36.0011	21.1716	Negative	Positive	Positive	Positive	Positive		129.729	67.9684	Rheumatoid Arthritis
68	Male		23.2836	24.5407	22.9173	Positive	Negative			Negative	Negative	134.117		Rheumatoid Arthritis
44	Male	38.7555	20.0482	27.11		Positive		Negative		Positive	Negative	92.8796	39.6038	Rheumatoid Arthritis
29	Male	29.5982	28.0778		33.2225	Negative	Negative	Positive	Negative	Negative		135.417	28.5056	Rheumatoid Arthritis
27	Male	37.6429	27.0923	38.0288	39.3873	Positive	Positive	Negative	Negative				28.7915	Rheumatoid Arthritis
78	Male	31.8966	20.7876	23.5682	21.7593	Positive			Negative	Positive	Negative	201.469	41.9814	Rheumatoid Arthritis
42	Male	37.3702	12.5312	28.7026	30.7117	Positive	Negative			Positive		141.403	49.4231	Rheumatoid Arthritis
48	Female	45.38		35.4168		Positive					Negative	93.8439	71.4768	Rheumatoid Arthritis
20	Male	47.243	12.5688	31.695	29.6738	Negative	Negative		Negative		Positive		63.4674	Rheumatoid Arthritis
33	Male	41.7415		31.7662		Positive	Positive			Negative		146.288		Rheumatoid Arthritis
32	Male	34.63	17.877	33.5712	38.0252	Positive	Negative	Positive	Negative		Positive	134.197	44.3388	Rheumatoid Arthritis
61	Female	36.4439		32.3107	25.1423	Positive	Negative	Negative	Positive		Positive	177.821	67.0048	Rheumatoid Arthritis
47	Female	30.7863	17.8874	24.1061		Negative		Negative	Negative			121.526	36.8892	Rheumatoid Arthritis
71	Male	46.2959			32.7281	Negative	Positive	Positive	Negative	Positive	Positive	108.039	43.8461	Rheumatoid Arthritis
38	Female		19.5122	21.1919	39.5526		Positive		Positive	Positive	Positive	178.973	42.529	Rheumatoid Arthritis
63	Female	33.2774	26.9018	25.7481	30.5203	Negative	Positive	Negative	Positive	Positive	Positive	124.633	29.2065	Rheumatoid Arthritis
65	Female	34.0483	17.687	26.097				Positive	Positive	Positive	Positive	132.769	56.1931	Rheumatoid Arthritis
38	Male	47.9472	18.5024	24.7004	24.1074	Positive	Negative	Positive	Negative	Positive	Positive	142.956	37.4514	Rheumatoid Arthritis
79	Female	36.5893	27.9475	23.2327		Positive	Negative	Positive	Negative	Positive		192.242	55.756	Rheumatoid Arthritis
58	Male	26.016	17.5433	21.1012		Positive	Positive	Positive			Positive	145.942		Rheumatoid Arthritis
60	Female		25.4949		30.7295	Positive		Negative		Negative		91.0871	37.1743	Rheumatoid Arthritis
37	Female	45.757	29.7554	26.614	37.2475	Negative	Positive	Negative	Negative		Negative	143.793		Rheumatoid Arthritis
33	Male	41.7182	28.5475	23.3994	36.0998	Positive		Positive	Negative	Negative	Positive	99.5724	27.3064	Rheumatoid Arthritis
53	Male	40.207	16.8125	29.3407		Negative	Negative	Negative	Negative	Negative			51.4217	Rheumatoid Arthritis
63	Male	32.5719	13.311	39.9761	22.9668	Negative	Positive	Negative	Negative	Negative		180.618	47.5068	Rheumatoid Arthritis
61	Female	45.4053		35.7015		Positive	Positive	Positive	Positive	Positive	Negative	179.907		Rheumatoid Arthritis
25	Male	29.5646		33.9956		Positive		Negative	Negative	Negative	Negative	166.09	31.4235	Rheumatoid Arthritis
60	Male	30.2679		33.2266	25.9825		Positive			Negative	Positive	129.146	63.9668	Rheumatoid Arthritis
74	Female	38.5629	23.9562	37.0923	39.0417	Positive		Positive	Negative	Negative	Positive	137.604	68.8204	Rheumatoid Arthritis
49	Female	27.9455					Negative	Negative	Positive		Positive	168.68	18.4299	Rheumatoid Arthritis
75	Male	45.0496	29.0961	31.0061	35.9881	Positive	Negative	Negative	Negative	Positive	Negative	144.15		Rheumatoid Arthritis
36	Female	31.8495	12.1486	26.3282		Negative	Negative				Positive	197.877	49.4492	Rheumatoid Arthritis
32	Male	28.352	22.5213	25.3609	34.8545	Positive		Negative	Negative		Negative	174.913		Rheumatoid Arthritis
79	Female	31.6863	28.3367	21.0572		Negative	Negative	Negative	Negative	Positive		151.183	22.364	Rheumatoid Arthritis
75	Female	27.4019	15.0645		31.887	Positive	Positive	Negative		Positive	Positive	125.229	35.515	Rheumatoid Arthritis
33	Male	31.9427	21.8681	38.9802	38.3204	Negative			Positive	Negative	Positive	89.0597	32.4007	Rheumatoid Arthritis
53	Female	39.2094	18.1973	33.1696	29.9596		Positive	Positive	Positive	Positive		107.202		Rheumatoid Arthritis
42	Female	46.8708		38.3148	33.7505	Positive		Negative	Negative			182.222	51.5064	Rheumatoid Arthritis
66	Male	39.436	28.7918	25.964	32.4376	Positive		Negative				160.251	19.413	Rheumatoid Arthritis
51	Male	39.1911	25.3296	36.2174	38.9021	Negative	Negative	Negative	Negative	Positive	Negative	116.303	51.5569	Rheumatoid Arthritis
34	Female	39.1066	14.3047	37.634	29.8762	Positive	Positive	Positive	Negative	Positive	Negative		42.9202	Rheumatoid Arthritis
28	Male	33.8907		27.0993	27.4667	Positive	Negative	Positive	Positive	Negative	Negative	108.07	60.3997	Rheumatoid Arthritis
42	Male	33.9938	24.6341	21.7141	33.4589	Negative	Negative	Positive		Negative	Negative	162.403	70.4088	Rheumatoid Arthritis
64	Male	30.1232	20.3923	30.7777	34.5136	Positive	Positive	Negative	Negative		Positive		36.182	Rheumatoid Arthritis
62	Male			28.7556	26.5393	Positive	Positive	Negative	Negative	Positive		180.134	31.8995	Rheumatoid Arthritis
67	Female	31.5086	27.9498	22.816	25.1268	Negative	Negative	Negative	Positive		Negative	127.274	67.9084	Rheumatoid Arthritis
60	Female	29.2296	24.7437		34.2649	Negative			Negative			119.734		Rheumatoid Arthritis
53	Female	36.9864	11.5342	31.0065	33.1266	Negative		Negative		Positive	Positive		51.5677	Rheumatoid Arthritis
34	Male	34.0218	27.8512	26.6196	27.8572	Negative	Positive	Positive	Positive			106.036	34.4194	Rheumatoid Arthritis
35	Male	34.2634	28.0959	36.2756		Positive			Negative			125.548	26.8542	Rheumatoid Arthritis
79	Male			30.4908		Positive		Negative	Positive	Positive	Negative	119.937	70.3075	Rheumatoid Arthritis
25	Female	36.1171		25.9342		Negative		Positive	Positive	Negative	Negative	116.855	51.8417	Rheumatoid Arthritis
30	Male	36.8292	23.204	34.9046	36.7508	Positive	Negative	Positive			Negative	168.863		Rheumatoid Arthritis
65	Female	38.4461	15.8397			Positive		Positive		Positive	Positive		24.8904	Rheumatoid Arthritis
21	Female	32.9883	12.1065	31.9401		Negative	Positive	Negative	Positive			89.0512	59.6665	Rheumatoid Arthritis
66	Female	38.5643	28.581			Positive	Positive	Positive			Negative	191.097		Rheumatoid Arthritis
64	Female	29.7579	22.6631	38.3856	24.9327				Negative	Negative	Positive		16.0139	Rheumatoid Arthritis
70	Female	39.3947	26.6321	24.9173	39.5326	Positive	Positive	Positive	Positive	Negative	Negative	132.766	43.4034	Rheumatoid Arthritis
27	Female	32.7022	26.5251	28.4975	22.1515	Negative	Negative	Negative	Positive		Positive	101.064	38.4474	Rheumatoid Arthritis
50	Female	49.4459	20.4561	34.9584			Negative	Negative	Negative	Positive	Positive	143.213	23.5719	Rheumatoid Arthritis
47	Male	43.1877	19.4555	37.8186	39.9986	Positive			Negative	Negative				Rheumatoid Arthritis
62	Male	29.6283	29.3447	28.2133	27.1056	Negative		Positive	Positive		Negative	132.489	33.4347	Rheumatoid Arthritis
47	Female	27.5509	20.3916	35.4027	23.7759		Negative	Negative	Negative	Positive		102.865	13.2833	Rheumatoid Arthritis
53	Male	36.1397	24.5642	36.7104	25.2794	Positive	Positive	Negative	Positive	Negative	Positive	99.5106	49.3773	Rheumatoid Arthritis
69	Male		25.2122	21.645		Negative	Negative	Positive			Negative	120.257		Rheumatoid Arthritis
32	Female	30.5605	22.127	30.5176		Positive	Negative	Negative	Positive	Positive			72.696	Rheumatoid Arthritis
70	Male	27.8265	19.8452	39.7161	37.408		Negative	Negative	Negative	Negative	Positive	101.499		Rheumatoid Arthritis
42	Male			31.7138		Positive	Positive	Negative		Negative	Negative	142.234	66.8217	Rheumatoid Arthritis
23	Female	37.0462	12.6372	26.0436	36.0272	Negative	Negative		Positive	Positive	Positive	171.641	33.8607	Rheumatoid Arthritis
64	Male	34.4982	18.3866	29.5466	29.7636		Negative		Negative	Positive		189.052	36.4391	Rheumatoid Arthritis
41	Male	39.1829	23.0591	33.1676	33.2228		Positive	Positive	Negative	Positive		169.806		Rheumatoid Arthritis
20	Female	26.2729	12.1499	23.6721	38.8795	Positive	Positive	Negative	Positive		Negative		41.793	Rheumatoid Arthritis
61	Female	37.152	21.6818		39.7233	Negative	Positive	Negative	Positive		Positive	155.093	55.4153	Rheumatoid Arthritis
34	Female		21.842	21.7207		Negative	Negative	Positive	Positive	Positive		178.008	38.8744	Rheumatoid Arthritis
39	Female	33.0334		26.636	38.8199	Positive	Negative		Positive		Negative	114.063	14.6263	Rheumatoid Arthritis
25	Female	30.4679	20.7016		21.2136	Positive	Positive	Positive				135.123		Rheumatoid Arthritis
58	Female	34.4898	19.9654	37.8515			Positive		Positive	Positive	Positive		54.5389	Rheumatoid Arthritis
59	Male	31.4887	29.7068		34.4278	Negative	Positive			Positive	Negative	103.579	16.1357	Rheumatoid Arthritis
60	Male	27.8545	28.0878		24.7847	Negative		Positive	Positive	Positive		131.332	57.0582	Rheumatoid Arthritis
75	Female		25.1953	24.2497	31.5219	Negative		Negative		Negative	Negative	153.99	50.2456	Rheumatoid Arthritis
20	Male	37.4807	23.2525	37.6308	24.4073	Positive	Negative	Positive	Positive	Negative		148.108		Rheumatoid Arthritis
36	Male	39.3999	14.5627	23.9456	32.4603	Negative	Positive	Positive	Negative	Negative		152.193	71.6482	Rheumatoid Arthritis
79	Female	35.3647	20.9959	27.6198	35.5701			Positive	Positive	Positive		126.08	14.9442	Rheumatoid Arthritis
25	Female	36.421		36.9302	31.1819	Negative	Negative	Positive	Positive	Positive	Positive	115.713		Rheumatoid Arthritis
59	Male	33.1894	17.3137	32.3289		Positive	Negative	Positive	Negative		Positive	116.116	38.0401	Rheumatoid Arthritis
55	Male	47.0226	29.3096	24.121	25.2579	Negative	Negative	Negative	Negative		Negative	156.694	16.2289	Rheumatoid Arthritis
40	Female	47.8317	25.5862	30.939		Positive	Negative			Negative	Negative	156.729	27.7529	Rheumatoid Arthritis
36	Female	38.8164	24.6835	37.5717	28.0059	Negative		Positive	Positive	Positive		121.859	13.1453	Rheumatoid Arthritis
50	Male	30.5442	19.4199	31.4837	28.885	Negative		Positive	Negative	Positive		95.441	13.4108	Rheumatoid Arthritis
38	Female	37.6555			34.6403	Negative	Positive			Positive		147.932	51.3061	Rheumatoid Arthritis
29	Male	35.6246		26.3192	29.028	Positive	Negative		Positive		Negative	125.696	36.7845	Rheumatoid Arthritis
66	Male	45.1305	16.6607	32.8922	28.9953		Negative		Negative			172.459		Rheumatoid Arthritis
66	Female	48.7234	22.8399	39.6939	38.2398		Negative	Positive	Negative	Negative		100.582	53.7045	Rheumatoid Arthritis
49	Female	33.0545	26.0733	32.7559	24.5545	Negative			Positive			157.356	44.3224	Rheumatoid Arthritis
61	Female	48.6842	20.6679	38.18		Positive		Negative	Negative		Negative	108.115	33.2963	Rheumatoid Arthritis
37	Female	40.4906	27.3779	39.1894	22.2263	Negative	Positive	Positive		Negative	Negative	91.7071	50.6563	Rheumatoid Arthritis
40	Female	42.5249	15.4434	30.049	23.6715	Negative	Positive	Negative	Negative		Positive	95.6785		Rheumatoid Arthritis
76	Female	39.8663	24.5212	32.338			Negative		Negative	Negative	Negative	175.088	25.18	Rheumatoid Arthritis
52	Male	37.6953	14.8894		33.6677	Negative	Negative	Positive	Positive		Negative	136.477	65.7083	Rheumatoid Arthritis
49	Female	35.1581		25.6795	28.0483	Positive	Positive	Negative		Negative	Positive	149.537	67.8177	Rheumatoid Arthritis
55	Female	36.2608	25.2139	23.711	28.4962			Negative		Positive	Positive	151.998	68.9961	Rheumatoid Arthritis
70	Female	33.8527		23.5777	30.6175		Positive	Positive	Positive	Negative	Positive	136.124		Rheumatoid Arthritis
63	Male	36.3071	11.2165	22.0785	21.1834	Negative	Negative	Positive	Negative	Positive			41.8254	Rheumatoid Arthritis
61	Female	36.3706		35.0981		Positive		Negative	Positive		Positive	107.378	25.4539	Rheumatoid Arthritis
57	Male	32.8833		28.2391	38.9557	Positive		Positive		Positive	Positive	104.157	65.5191	Rheumatoid Arthritis
55	Male	34.7361	28.2151	26.9656	25.0228	Positive	Negative	Negative	Positive		Positive	131.996		Rheumatoid Arthritis
37	Male	33.5438	25.417	29.2786	24.1225	Negative	Negative	Negative		Negative				Rheumatoid Arthritis
79	Female	31.3786		24.2433	24.3299	Positive	Positive	Negative	Positive			176.043	73.1774	Rheumatoid Arthritis
60	Male	41.2166	24.6644	21.6223			Positive	Negative		Negative			36.9476	Rheumatoid Arthritis
78	Male	37.1036	27.8769	24.1438	27.1648	Negative			Negative	Positive	Negative	170.994	27.425	Rheumatoid Arthritis
22	Female	29.4101		34.7717	39.8903		Positive	Negative	Negative		Negative	199.64	17.6802	Rheumatoid Arthritis
52	Female	46.5702	27.6971	31.9381	33.9604	Positive	Positive	Negative	Positive		Negative	92.8826	52.6418	Rheumatoid Arthritis
68	Female	34.4452	29.964	21.0025		Positive		Positive	Positive		Positive	161.481	38.6687	Rheumatoid Arthritis
32	Male	43.3378	20.6353	36.2498	24.1364	Positive						201.643	73.5061	Rheumatoid Arthritis
41	Female	38.7719	24.8014	32.1031	27.1975	Positive	Negative	Positive	Negative		Negative	133.717	33.5587	Rheumatoid Arthritis
46	Male	27.1353	27.5141	31.5817	39.4844	Positive			Negative		Positive	128.112	64.8572	Rheumatoid Arthritis
36	Male	48.9246	26.7608		34.3593	Negative		Positive	Positive		Positive	142.553	47.7412	Rheumatoid Arthritis
25	Male	31.7386		33.3994	25.2628	Negative	Negative	Positive	Negative	Positive	Negative	166.06	49.5242	Rheumatoid Arthritis
61	Female	49.8565	21.0552	34.0027	24.4533		Positive	Negative	Positive	Positive		153.63	70.0148	Rheumatoid Arthritis
54	Male	27.9916	28.6663	33.298	26.371	Positive		Positive				151.155	12.8597	Rheumatoid Arthritis
64	Female	37.7273	14.8005	23.2353	21.7624	Negative	Negative	Negative	Negative	Positive		136.856	44.0729	Rheumatoid Arthritis
42	Female	26.2237	24.294	27.6371	22.0529	Positive	Positive	Negative	Negative			90.3565	58.8708	Rheumatoid Arthritis
24	Male	42.4962	13.3342	21.4586		Positive			Positive		Negative	126.37	56.1378	Rheumatoid Arthritis
80	Male	26.1282	25.3523	32.7596	28.2024	Negative	Positive	Positive		Positive		143.611	68.7918	Rheumatoid Arthritis
48	Female	27.316		36.2422		Positive	Positive	Negative				192.112	38.6851	Rheumatoid Arthritis
21	Male	39.564	14.2489		22.0513	Negative	Negative		Negative	Negative	Negative	98.8979	59.0089	Rheumatoid Arthritis
48	Female		16.145		24.9815	Positive		Positive	Negative		Negative	111.911	55.0681	Rheumatoid Arthritis
27	Female	36.7174	15.2542			Positive	Positive	Negative	Positive		Positive	162.899	70.1154	Rheumatoid Arthritis
37	Female	37.6442	12.5861	26.1168	21.5022	Negative	Negative			Negative		149.858	23.8003	Rheumatoid Arthritis
28	Female	31.9418	15.3939	35.3023	28.1147	Positive	Negative	Negative	Negative	Positive		125.906	48.0338	Rheumatoid Arthritis
38	Male	29.3605	20.6535	32.041	26.2811	Negative	Positive			Positive	Positive	150.208		Rheumatoid Arthritis
21	Male			35.649		Positive	Positive	Negative				132.004	56.7763	Rheumatoid Arthritis
40	Male	34.4513		22.854	23.8348	Negative	Positive	Negative		Positive	Positive	173.065	14.6087	Rheumatoid Arthritis
76	Female	32.5656	23.1913	38.2854	35.8193	Negative	Negative	Negative			Negative	173.314	33.7943	Rheumatoid Arthritis
77	Male	42.3148	18.5576	30.5264		Negative		Positive	Positive		Negative	161.055		Rheumatoid Arthritis
65	Female		16.6717	37.0519			Negative		Negative	Positive			49.4219	Rheumatoid Arthritis
53	Male	43.6338	15.0605	30.2436	33.0703			Negative	Positive			186.509	68.0525	Rheumatoid Arthritis
74	Male	26.3378	29.6513	33.9784		Positive	Positive	Negative	Negative	Positive		125.227	38.7185	Rheumatoid Arthritis
67	Female	28.0718	19.0761	37.3071		Positive		Negative	Positive		Positive		56.9243	Rheumatoid Arthritis
62	Female	37.1365	27.4583		24.242	Negative	Negative		Negative	Positive	Negative	179.195	40.3719	Rheumatoid Arthritis
41	Male	32.8487		21.1801	37.8941	Positive	Negative	Negative	Negative	Positive		180.805	12.0781	Rheumatoid Arthritis
48	Female	30.8189	26.6316	21.9332	27.3782	Positive		Negative	Positive			165.934	34.7203	Rheumatoid Arthritis
54	Female	30.6921	26.2597	39.4022	30.3423	Positive	Positive		Negative	Positive	Negative	197.407		Rheumatoid Arthritis
42	Male			39.2909	30.7807	Negative	Positive		Positive	Negative			28.537	Rheumatoid Arthritis
23	Male	29.793		36.0106	26.9841	Negative	Negative	Positive				151.009	18.3867	Rheumatoid Arthritis
43	Female	28.9946	15.4459	29.6877	28.1937		Negative	Positive	Positive			123.259	65.3068	Rheumatoid Arthritis
78	Female	31.6079	17.8247	25.5364		Negative	Negative	Negative	Positive	Negative		170.655	56.7569	Rheumatoid Arthritis
21	Male		23.6367	21.5982	22.2307	Positive	Negative	Negative		Negative	Negative	99.4527	19.9905	Rheumatoid Arthritis
48	Female	43.6421	19.1493	39.8608	28.8459			Positive	Positive		Positive	168.715	51.0244	Rheumatoid Arthritis
32	Male	45.2028	20.048	33.0692		Positive		Negative	Positive		Negative	184.617	14.9768	Rheumatoid Arthritis
25	Male	30.1434	19.6454	30.4679	36.3261	Negative	Negative	Negative	Positive	Positive	Negative	118.933	42.5799	Rheumatoid Arthritis
42	Female	31.7137	29.5795		29.5188	Negative	Negative	Negative	Positive		Positive	127.877		Rheumatoid Arthritis
45	Male	34.7549	17.1318		24.7759		Negative		Negative			129.195	42.6059	Rheumatoid Arthritis
50	Male	27.168	17.9178	33.234	33.2063	Positive		Negative	Negative	Negative	Positive	111.785		Rheumatoid Arthritis
44	Male	38.4151	28.5784	33.0851	29.758	Negative	Positive	Negative	Positive		Positive	146.601	72.4451	Rheumatoid Arthritis
47	Female	29.4096	17.6985	26.5444		Positive	Negative			Positive		154.409		Rheumatoid Arthritis
69	Male	34.579	19.378	23.164	22.124	Positive			Positive	Negative		105.553	22.8103	Rheumatoid Arthritis
43	Female		20.0805	23.9311	26.0398	Negative	Positive		Positive		Positive	179.086	36.8446	Rheumatoid Arthritis
61	Male		17.327	21.6483						Positive		102.762	49.9297	Rheumatoid Arthritis
55	Female	35.2465	24.8784	25.5901	32.2382	Positive	Negative	Negative		Negative		154.844		Rheumatoid Arthritis
23	Female	46.2779		27.7611	28.0876	Negative	Negative	Positive	Positive		Negative	172.009		Rheumatoid Arthritis
74	Female	39.963	11.5232			Negative		Negative	Negative	Negative	Negative	172.012	37.6442	Rheumatoid Arthritis
57	Female	48.8431		22.145	27.9911	Negative	Negative	Positive	Negative		Positive	161.371		Rheumatoid Arthritis
75	Male	31.3149	15.9049	26.1046	21.4157	Positive	Positive		Positive			170.485	35.568	Rheumatoid Arthritis
53	Male	27.2002	21.1048		33.4948	Positive			Positive				70.5902	Rheumatoid Arthritis
54	Female	39.6785	18.9059	29.4553		Positive	Negative	Positive	Positive	Positive				Rheumatoid Arthritis
75	Female	31.9597	26.3584	36.2804	39.07	Negative	Negative	Negative	Positive			155.649	25.9618	Rheumatoid Arthritis
30	Female	37.6961	16.8874	26.6358		Negative		Positive		Negative		146.411	50.4732	Rheumatoid Arthritis
65	Female	42.2562	24.6291			Positive			Positive		Negative	175.121	63.7129	Rheumatoid Arthritis
25	Male	38.7075	29.09	39.0619	39.386	Negative	Negative	Negative		Negative	Positive	102.399	42.9625	Rheumatoid Arthritis
24	Female	34.6411	22.9332	38.3482	31.1498		Negative	Negative	Positive	Negative		153.193	32.1243	Rheumatoid Arthritis
42	Male	34.7429	27.8512			Positive	Negative	Positive	Negative		Positive	121.826	45.8336	Rheumatoid Arthritis
49	Female	38.0587		33.4122	33.519	Negative			Positive	Positive	Negative	191.237	51.8397	Rheumatoid Arthritis
77	Male	37.3584	29.543	34.627	39.7902		Positive	Negative	Negative	Negative		156.91	64.7599	Rheumatoid Arthritis
30	Male	48.7744	26.2046	21.6998	35.4895		Negative	Positive	Negative	Positive		149.907	67.6524	Rheumatoid Arthritis
69	Female	27.3879	12.6168	27.4422				Negative		Negative	Negative	138.638	44.3392	Rheumatoid Arthritis
80	Male	32.0887	15.3945	22.6793		Negative	Positive			Negative	Positive	129.428	48.9452	Rheumatoid Arthritis
48	Male	30.8697	28.7048	26.5618			Negative	Negative			Negative	145.414	40.8482	Rheumatoid Arthritis
23	Male	45.3754	14.5735	31.022	25.2061	Negative	Positive	Positive	Positive		Negative	117.738		Rheumatoid Arthritis
39	Female	26.9589	29.9535	21.9536	38.7912	Positive	Positive		Positive	Negative	Negative	111.151	69.5443	Rheumatoid Arthritis
27	Female	30.2201	15.1022	21.8479		Positive	Negative	Negative			Positive	150.711	26.7354	Rheumatoid Arthritis
26	Male	33.7694	25.7858	21.3256		Negative	Negative				Negative	127.52		Rheumatoid Arthritis
80	Female	33.5101	24.5346	30.4935	25.6955			Positive	Negative				27.8833	Rheumatoid Arthritis
71	Male	30.2869	20.6178	22.7665		Positive	Positive	Negative		Negative		171.257	44.1771	Rheumatoid Arthritis
55	Male	28.3784		31.2277	23.6576	Negative	Negative	Positive		Negative	Negative	174.106	19.1321	Rheumatoid Arthritis
72	Female	38.8158	24.658	36.3367			Negative			Positive		110.271		Rheumatoid Arthritis
55	Male	32.6873	13.7922	33.5365	38.8049	Negative	Negative	Negative	Negative	Negative			21.7649	Rheumatoid Arthritis
71	Male	37.2475	23.8063	33.2716	31.6473	Negative	Positive	Positive	Positive	Negative		107.122	68.8268	Rheumatoid Arthritis
39	Female		18.0307	27.4569		Negative		Positive	Positive	Negative	Negative	106.887		Rheumatoid Arthritis
23	Male	42.2181	16.178	31.9049	26.7908	Positive	Positive						24.8032	Rheumatoid Arthritis
32	Male	36.7651	15.9736	21.6232		Negative		Negative		Positive		92.0723		Rheumatoid Arthritis
66	Male	36.9207	20.6587	22.411	35.0329	Negative	Negative	Positive	Positive	Positive	Negative	97.3008	47.4411	Rheumatoid Arthritis
23	Female		11.3556	35.8743	32.6298	Positive	Negative	Positive	Negative	Negative		98.7695	19.9531	Rheumatoid Arthritis
72	Female	27.0225	20.6314	27.5006	36.3184	Positive		Negative	Negative		Negative	98.0624		Rheumatoid Arthritis
51	Male	32.6541	13.7098	39.856	38.0922	Negative	Positive	Positive	Negative		Positive	148.121	17.1964	Rheumatoid Arthritis
68	Male	29.3812	16.8119	24.3953		Negative	Negative	Positive	Positive	Positive	Negative	198.044	52.2738	Rheumatoid Arthritis
47	Male	28.7817	11.2173	25.6907	32.9412	Negative	Negative	Negative	Positive	Positive		205.62		Rheumatoid Arthritis
55	Female	32.3653	22.9792			Negative	Negative	Positive	Positive		Positive	176.027		Rheumatoid Arthritis
25	Female	39.5691	14.8179		31.9684	Positive		Negative	Positive	Negative	Negative		17.7088	Rheumatoid Arthritis
23	Female	28.1945	25.6309	21.5529	28.3605	Positive		Positive			Positive	98.3352	67.0864	Rheumatoid Arthritis
46	Male	36.7827		26.8719		Positive	Positive	Negative	Negative	Negative		124.829	43.1144	Rheumatoid Arthritis
33	Female		24.9319	26.4358	22.5874	Positive		Positive	Negative		Negative	128.723	46.6527	Rheumatoid Arthritis
51	Male	29.8131	18.4742		39.9927	Positive	Negative		Positive	Negative	Negative	166.359	31.6417	Rheumatoid Arthritis
22	Male	26.6443	19.6395	27.9819	29.4254		Positive	Positive	Positive			185.009		Rheumatoid Arthritis
28	Female	29.5659	25.1376	37.1797	28.52	Negative		Negative	Negative	Positive	Negative	170.527	21.764	Rheumatoid Arthritis
27	Female	37.3179	14.5957	24.886	31.6698	Positive	Negative		Negative			164.563	57.637	Rheumatoid Arthritis
49	Male	29.2661		26.352		Positive	Negative	Positive			Positive	154.735	35.263	Rheumatoid Arthritis
50	Female	48.0607		34.376	33.3699	Positive		Negative	Positive	Positive	Negative	125.832		Rheumatoid Arthritis
54	Female	49.1255	26.0685	36.2252		Positive	Negative	Negative	Positive	Negative			26.7228	Rheumatoid Arthritis
44	Male	34.559	18.0166	33.6545			Positive	Positive			Positive	102.678	13.5629	Rheumatoid Arthritis
73	Male	44.6508		23.4058	27.6655	Positive			Negative	Positive	Positive	203.302	48.9711	Rheumatoid Arthritis
58	Female	32.9002		38.4937	31.5052	Negative	Negative	Negative	Positive	Negative		94.8403	26.0537	Rheumatoid Arthritis
64	Female	31.5078	27.0044	33.6703	39.3934			Positive	Positive	Negative		120.479	64.1785	Rheumatoid Arthritis
70	Female	26.4635	11.2117	31.9896	25.2842	Negative	Positive		Positive			175.624		Rheumatoid Arthritis
29	Male		22.9132	31.0423		Negative	Negative	Positive	Negative	Negative		130.259		Rheumatoid Arthritis
60	Male	30.8105	16.0369	29.7568		Negative	Negative	Positive			Positive	107.838	15.6329	Rheumatoid Arthritis
47	Male	30.8629	22.3074	39.1137	24.9516	Negative	Positive		Positive		Negative		31.716	Rheumatoid Arthritis
71	Female	33.0521	29.5865	39.463	24.7172	Positive		Negative	Negative	Positive	Negative	191.918	13.9443	Rheumatoid Arthritis
62	Male	37.9033	25.6932	29.7398		Positive	Positive					134.706	48.4808	Rheumatoid Arthritis
37	Female	32.3514	18.6485	31.9157	30.4702	Positive	Positive	Positive	Negative	Negative	Negative	173.379	51.3	Rheumatoid Arthritis
75	Female	26.6882	20.4357	21.9047	38.0873	Negative	Positive			Negative	Positive	203.415	17.3728	Rheumatoid Arthritis
47	Female	26.6177	29.7505	25.4149		Negative		Positive	Positive	Negative			29.8879	Rheumatoid Arthritis
20	Female	28.2411	18.3439	35.5735	30.607		Positive	Negative					36.0754	Rheumatoid Arthritis
75	Male	29.1426	18.6152	33.9587	30.5999	Negative			Negative			147.25	24.8292	Rheumatoid Arthritis
26	Male	27.0136		25.9418	36.7784	Negative	Positive	Positive	Positive			114.059	22.0408	Rheumatoid Arthritis
59	Male	44.6006	29.9758	22.6099	29.2954	Negative	Positive	Negative	Negative	Positive		109.696	40.4267	Rheumatoid Arthritis
41	Female	36.5885	13.0418	30.2567	22.2961	Positive		Negative	Positive	Negative		179.539	44.5978	Rheumatoid Arthritis
48	Female	29.0391	12.7366	31.5963	32.9155	Positive	Positive	Negative	Negative			105.374	46.1087	Rheumatoid Arthritis
36	Male	32.1344	22.8205	32.5487	21.5916		Positive	Positive	Positive		Negative	138.624	46.6972	Rheumatoid Arthritis
59	Female	48.7505	17.0734	24.9609	33.5347		Negative	Positive		Negative	Positive	94.9351	23.0221	Rheumatoid Arthritis
27	Female	33.4786	11.9913	28.7414	32.8277	Negative	Positive	Positive		Negative	Positive	115.453	22.4935	Rheumatoid Arthritis
32	Female	30.8568	14.5379	31.3297		Positive	Negative	Positive	Negative	Negative	Negative	187.168	71.3085	Rheumatoid Arthritis
64	Male	33.2835		31.9688	29.2641	Negative		Negative		Negative	Negative	156.086	25.0174	Rheumatoid Arthritis
30	Female	28.0365	20.1583	30.735	24.9432	Positive	Positive		Negative		Positive			Rheumatoid Arthritis
70	Female	38.615		28.4909	32.998	Positive	Negative	Positive	Negative				19.9038	Rheumatoid Arthritis
33	Male	39.7683			32.2545	Positive	Negative	Positive	Negative		Negative	118.112		Rheumatoid Arthritis
27	Male	31.9106	15.686	23.8179	29.0952		Positive	Positive		Positive	Negative	169.283	56.5818	Rheumatoid Arthritis
29	Male	33.0118	13.4789	32.9045	36.8642		Negative		Negative		Negative	143.968	49.3883	Rheumatoid Arthritis
38	Male	31.4881	21.5919		35.4002	Negative	Positive	Positive	Negative	Positive	Positive	164.718	52.7791	Rheumatoid Arthritis
34	Female	31.1416	24.5559	35.4504	33.2364	Negative	Positive	Negative	Negative	Positive	Negative	107.344	35.0082	Rheumatoid Arthritis
69	Male	30.0946	22.116	32.188	27.7197	Negative	Positive	Negative	Negative		Negative	92.2706	29.6723	Rheumatoid Arthritis
75	Male	28.329		39.1006	34.7139	Positive		Positive	Positive	Negative	Positive	141.796	26.7811	Rheumatoid Arthritis
71	Female	38.8742	20.1906	33.9485	27.5306	Positive	Positive			Positive		200.995		Rheumatoid Arthritis
77	Male	35.816	24.523	34.1134	29.419	Positive	Positive		Positive	Positive	Negative	184.68	46.33	Rheumatoid Arthritis
62	Female	34.5067	19.9496					Negative	Negative	Positive		178.902	59.6239	Rheumatoid Arthritis
73	Female		27.3339	21.026	36.901	Negative	Positive	Positive	Negative	Positive	Positive	108.974	67.0678	Rheumatoid Arthritis
40	Male	38.0946	24.0382	29.2396	31.6057	Positive		Positive	Positive	Positive	Positive	156.065	31.7716	Rheumatoid Arthritis
43	Male	34.8872	28.3782	38.0227		Positive	Negative	Positive		Negative	Positive	128.24	69.7055	Rheumatoid Arthritis
31	Male	33.0527		21.8324		Positive	Positive	Positive	Positive	Negative		124.044	50.3034	Rheumatoid Arthritis
57	Female	36.5974			39.8391		Positive		Negative	Positive	Positive			Rheumatoid Arthritis
51	Male		26.9001				Positive	Positive		Positive		127.08	68.5343	Rheumatoid Arthritis
26	Male	47.8637	18.8038	31.0594	21.2484	Negative	Negative	Negative		Positive	Negative	107.109		Rheumatoid Arthritis
31	Female	36.4531	18.9618	27.7477			Positive				Positive	127.955	52.932	Rheumatoid Arthritis
74	Female	34.8402	14.4867	36.3004	32.2492			Positive				132.377	52.5298	Rheumatoid Arthritis
80	Male	27.3497	28.6325	39.017	26.504	Positive			Positive	Negative	Negative	105.4	57.0858	Rheumatoid Arthritis
58	Female	48.0582		31.1394		Negative		Positive	Negative		Negative	159.545	14.8595	Rheumatoid Arthritis
20	Female	34.8882	16.763	22.561		Positive	Positive	Negative	Negative	Positive	Negative	93.966	22.4819	Rheumatoid Arthritis
70	Female	35.7346	27.8332	36.4253		Negative	Positive	Positive	Negative	Negative	Negative	137.667	31.8556	Rheumatoid Arthritis
25	Female	30.8131	29.7352	39.4138		Negative	Negative	Negative	Negative		Positive	172.764		Rheumatoid Arthritis
74	Female	35.374	27.699	35.4827	36.2797	Positive	Positive		Negative		Negative	199.939	13.258	Rheumatoid Arthritis
30	Female			25.9961	22.548	Negative	Positive		Positive		Positive	96.7009		Rheumatoid Arthritis
53	Female	29.8007		36.3398	23.0108		Positive		Negative		Positive	185.067	54.4937	Rheumatoid Arthritis
36	Female	38.8953	26.6407	24.7089	38.0678		Positive	Positive		Negative	Negative			Rheumatoid Arthritis
67	Male	26.4649		37.4934		Positive	Negative	Negative	Positive	Positive	Positive	107.068	28.2679	Rheumatoid Arthritis
79	Female	36.7487	14.2681	23.0099	33.7258	Negative		Negative	Negative	Positive	Positive		68.4015	Rheumatoid Arthritis
55	Male	34.1711	16.8014	22.5508	30.351	Positive		Positive	Negative		Positive	145.219	55.8297	Rheumatoid Arthritis
30	Female	38.791		30.5631		Positive	Negative	Positive	Negative	Negative	Negative	121.617		Rheumatoid Arthritis
29	Male	27.8785	26.7034	23.5576	29.575	Positive		Positive	Positive		Positive	112.866		Rheumatoid Arthritis
74	Male	44.4119		23.2909	33.4251	Negative		Positive	Positive	Negative	Negative	130.46	32.5861	Rheumatoid Arthritis
58	Female	35.9706	16.6248	34.4066	28.158	Negative	Positive						27.9338	Rheumatoid Arthritis
41	Male	29.0662	13.9263	23.1033	22.2538	Positive		Negative		Positive	Positive	101.798	37.5608	Rheumatoid Arthritis
57	Male	29.359		36.7775		Negative	Negative	Negative	Positive	Positive	Negative	138.025	13.0441	Rheumatoid Arthritis
68	Female	31.0249	24.0146	39.818	31.8218	Positive	Positive		Negative		Negative	130.721	60.9707	Rheumatoid Arthritis
27	Female	32.5328	25.9412	36.3138	27.268	Positive	Negative	Negative	Negative	Negative	Negative		67.4262	Rheumatoid Arthritis
58	Female	26.7645	14.8802	37.2437	38.0159	Negative	Positive	Negative	Positive		Positive		25.4634	Rheumatoid Arthritis
80	Female	38.9999	15.8846	36.6115	34.6789	Negative		Negative	Positive	Negative	Positive	150.028	25.1116	Rheumatoid Arthritis
50	Female	48.9285	27.1708	22.3264		Positive		Negative	Positive	Positive		124.931	69.458	Rheumatoid Arthritis
79	Male	42.3112	27.348	27.3109	22.6062	Negative	Negative	Positive	Negative			157.732	46.0722	Rheumatoid Arthritis
34	Male		26.4985	26.5691	38.4313	Positive		Negative	Negative	Negative	Negative	117.342	58.4527	Rheumatoid Arthritis
63	Male	29.364	22.984	30.9		Negative			Negative	Negative		177.043	31.6715	Rheumatoid Arthritis
20	Male	40.9269	18.0168	32.4884	23.5803	Negative	Negative	Positive		Positive		148.575	44.3371	Rheumatoid Arthritis
37	Female	33.9508	19.2102	28.5007	30.2517	Positive	Positive	Negative	Negative		Positive	142.018		Rheumatoid Arthritis
26	Male	47.0965	27.1556	36.0852	37.631	Negative	Positive		Negative	Negative	Negative		69.4626	Rheumatoid Arthritis
67	Male	26.2087		28.0495	37.8201	Negative					Positive	103.486	18.8057	Rheumatoid Arthritis
55	Female	43.7118	15.9884	31.7319	28.2974	Positive	Negative	Positive			Positive	121.116	13.3986	Rheumatoid Arthritis
25	Female	26.8078	22.4916	25.8047	23.4812	Positive	Positive	Negative	Negative	Positive	Negative	140.555	33.9181	Rheumatoid Arthritis
76	Female	39.5099	13.8973	34.6614	39.371	Positive	Positive		Positive	Negative		121.943	32.2213	Rheumatoid Arthritis
30	Female	47.0754	24.1777		38.0671	Negative	Positive	Negative	Negative		Positive	121.08	51.3687	Rheumatoid Arthritis
60	Male	32.1513		28.6334	25.4756	Negative		Negative	Positive		Negative	150.738	57.6476	Rheumatoid Arthritis
66	Male	33.9064	26.15	29.107	30.1333	Positive	Positive	Negative	Negative	Positive	Negative	179.571		Rheumatoid Arthritis
50	Female	34.2698	22.8967	21.0326	22.954	Negative	Positive	Negative	Positive	Negative				Rheumatoid Arthritis
28	Female	32.6716	13.0937	32.1421	29.2388	Positive	Positive	Negative	Positive	Negative	Negative	154.779	35.5055	Rheumatoid Arthritis
28	Female	41.0364	26.8609	37.8088	25.0424	Positive	Positive	Negative		Positive	Positive	134.664		Rheumatoid Arthritis
72	Female		29.6806		29.8925		Negative	Negative		Positive	Negative	202.334	68.6559	Rheumatoid Arthritis
36	Male	42.1406	22.685	24.1546	38.0578	Positive	Positive		Positive		Positive	167.346		Rheumatoid Arthritis
21	Male	35.1663	12.7529	33.5042	32.614	Positive	Positive		Positive	Negative	Negative	176.954	25.4837	Rheumatoid Arthritis
58	Male	48.3342	25.7556	21.3517	35.7856	Negative	Negative	Positive	Positive			96.8363	70.1644	Rheumatoid Arthritis
58	Female	36.2659	18.8427	36.9134		Positive	Positive	Positive	Positive		Negative	155.16	32.5773	Rheumatoid Arthritis
37	Male	49.5221	21.3628	28.7247		Negative		Negative	Positive		Negative	133.856	60.5504	Rheumatoid Arthritis
41	Female	30.7796	25.202	32.5907		Positive	Negative	Negative	Negative			159.478	59.0034	Rheumatoid Arthritis
46	Male	33.8688	14.0262	32.5369	34.666	Negative	Positive	Positive	Positive	Positive	Positive			Rheumatoid Arthritis
23	Male	44.9634	18.4061	27.6651	30.8681	Negative	Positive	Positive	Positive		Negative	106.135	47.3069	Rheumatoid Arthritis
23	Male	40.1711	18.0954	21.6185	38.7183	Positive	Negative	Negative	Negative		Positive	169.563	58.0204	Rheumatoid Arthritis
49	Male	27.2768	14.8873	37.8506	29.0563	Positive			Negative	Negative	Positive	165.382	40.0355	Rheumatoid Arthritis
79	Female	49.5235	18.9405	33.3616		Negative	Negative	Positive	Negative		Negative	146.909	23.8233	Rheumatoid Arthritis
64	Male	27.679	16.2648	33.2601	27.0394		Positive	Negative	Positive	Negative	Positive		15.137	Rheumatoid Arthritis
34	Male		13.4277	37.6364	22.8968	Negative	Positive	Negative	Negative	Positive	Positive	93.0611	37.1941	Rheumatoid Arthritis
40	Female	46.915		38.577	39.6817	Positive	Positive	Negative					14.0979	Rheumatoid Arthritis
74	Male	48.7623	13.6315	21.4878		Positive	Positive	Negative	Positive	Negative		186.063		Rheumatoid Arthritis
65	Female	38.6473	15.3442	31.4719	22.011	Negative	Negative	Positive	Negative	Negative	Positive	109.233	33.2334	Rheumatoid Arthritis
43	Male	45.9312	15.354	38.7023	27.9674	Negative	Positive	Positive				92.5639	63.5464	Rheumatoid Arthritis
65	Male	38.6888	11.4125	29.959		Positive	Positive	Positive	Negative	Negative	Positive	176.788		Rheumatoid Arthritis
30	Male	32.3646	15.35	25.0338	30.1176	Negative			Positive		Negative	168.291	46.9069	Rheumatoid Arthritis
48	Male	34.5889	20.7735	26.6689	27.8577	Negative	Positive	Negative			Positive	129.739	19.7534	Rheumatoid Arthritis
39	Female	45.5139		21.6216		Negative	Negative	Positive		Positive		120.17	24.4716	Rheumatoid Arthritis
43	Male	43.0629	24.4505	27.6692	29.1261	Negative		Negative	Positive		Positive		64.0067	Rheumatoid Arthritis
53	Male	35.0926	13.4127	24.2335	37.4121	Negative	Positive	Positive	Negative	Positive		95.5828	71.5527	Rheumatoid Arthritis
51	Female	26.9826	28.2684	39.003		Negative		Negative	Negative	Positive	Positive		67.9759	Rheumatoid Arthritis
33	Male	47.0878	12.4845	38.6823	35.3147	Positive	Negative	Positive	Negative	Negative	Negative	114.922		Rheumatoid Arthritis
75	Female	39.4396	21.1489	27.9234		Negative		Negative	Positive			108.283	32.2004	Rheumatoid Arthritis
27	Male	39.5819	21.1286	38.3617	28.0483	Negative		Positive	Positive		Positive	154.228	19.664	Rheumatoid Arthritis
58	Female	30.4876		29.5398	21.4642	Negative					Negative		36.9057	Rheumatoid Arthritis
79	Female			34.2078					Negative		Negative	150.71	59.0371	Rheumatoid Arthritis
37	Female	29.3181		21.8097	39.2669	Negative	Positive	Positive	Negative	Positive	Positive	134.904	51.1644	Rheumatoid Arthritis
66	Male	44.164	14.7626	37.7213	21.0742	Negative		Negative	Positive	Negative			64.9817	Rheumatoid Arthritis
44	Male	32.6573	12.8788	38.8862		Positive	Negative	Positive	Negative		Negative	101.292	28.7059	Rheumatoid Arthritis
49	Male	40.7447	18.5254	34.5574	26.7761	Negative	Positive	Positive	Positive	Positive		160.084	69.6772	Rheumatoid Arthritis
50	Male	45.4462	28.4784	39.4408		Positive	Negative	Negative	Positive	Positive	Negative	139.269	18.619	Rheumatoid Arthritis
58	Female	28.8518	22.4458	33.1864	31.9176	Positive	Negative	Positive	Positive	Negative		178.344	35.1871	Rheumatoid Arthritis
79	Female	39.5197	13.4075	39.4434	26.6004	Positive	Negative	Negative	Positive	Positive		138.339	53.8446	Rheumatoid Arthritis
41	Male	42.7851	26.3057	30.1254	24.077	Negative	Positive		Positive		Positive	165.575	64.9138	Rheumatoid Arthritis
38	Male	39.4926	29.6441	37.4518	26.0062	Positive	Positive	Negative	Positive	Positive		190.653	23.3932	Rheumatoid Arthritis
61	Male	28.5585	25.4798	34.4688		Positive	Positive	Negative	Positive			133.516	60.5561	Rheumatoid Arthritis
31	Female	38.108	11.4084	37.8442	24.166	Positive	Positive	Negative	Positive		Negative	160.864		Rheumatoid Arthritis
50	Male		11.6459	21.5044	25.7599	Negative		Positive	Negative			135.947	71.9239	Rheumatoid Arthritis
42	Female	33.8896	28.1757	29.6624	29.2866	Negative	Positive	Positive			Positive	170.684	70.9973	Rheumatoid Arthritis
26	Male	35.2666		30.4553				Positive	Negative		Positive	88.3532	29.7524	Rheumatoid Arthritis
68	Male	37.6687	20.4285	26.6961		Negative	Positive	Positive	Negative			99.4552	50.5087	Rheumatoid Arthritis
75	Female	40.9437	16.9191	23.075	24.3477			Positive	Negative	Positive	Positive			Rheumatoid Arthritis
63	Male	32.7512	22.9484	27.2068		Positive		Negative	Positive		Positive	107.633	60.6353	Rheumatoid Arthritis
29	Male	41.7656	28.5843		33.9307		Positive	Positive	Positive		Positive	185.026	58.4732	Rheumatoid Arthritis
33	Female	42.885		21.4832	23.321	Positive	Negative	Negative	Positive		Negative		62.3565	Rheumatoid Arthritis
28	Female	39.8562	13.8115	39.9202	33.9048	Negative	Negative	Negative			Negative	125.069		Rheumatoid Arthritis
45	Male		27.2248	22.2058	28.841	Positive	Negative	Positive	Negative	Positive	Negative	128.008	61.3364	Rheumatoid Arthritis
50	Female	49.9798	28.277			Positive			Negative		Negative	156.32	57.0075	Rheumatoid Arthritis
55	Female	31.4474	23.1873	39.8524		Positive		Positive	Positive	Positive		95.0589		Rheumatoid Arthritis
30	Male	27.3904	20.711	29.5752			Negative	Positive	Negative			177.658	73.9575	Rheumatoid Arthritis
77	Male		20.2859	30.4937	29.6549		Negative		Positive	Negative		180.476		Rheumatoid Arthritis
54	Male	28.5487		29.1547		Negative	Positive	Positive	Negative				65.4088	Rheumatoid Arthritis
45	Female	45.3744	16.6555	22.1188	26.7839		Positive	Negative	Negative	Negative	Positive	97.3102	68.2334	Rheumatoid Arthritis
32	Male		13.6759	36.2603		Positive		Negative	Negative	Positive	Positive	101.078	38.0977	Rheumatoid Arthritis
36	Female	39.1848	13.1133	27.7613	31.3455	Negative	Positive		Positive	Positive	Negative	139.807	41.6739	Rheumatoid Arthritis
24	Male	31.5238		28.7973	21.181	Positive	Negative	Negative	Positive	Positive				Rheumatoid Arthritis
79	Female	26.779	13.4193	32.6297	32.8792			Negative	Positive		Positive		46.5384	Rheumatoid Arthritis
63	Female	35.333	18.6139	28.8023	22.7773	Positive	Positive	Negative	Positive			102.128	25.9932	Rheumatoid Arthritis
80	Male	49.6255	26.4459	28.6812		Positive		Positive	Negative		Positive	130.581	15.41	Rheumatoid Arthritis
41	Male	35.7406	14.5815		38.1621	Positive	Negative			Negative	Negative	153.845	55.4922	Rheumatoid Arthritis
65	Female	42.8496	29.9229	39.5302	28.7322	Negative	Positive		Negative			107.33	41.9928	Rheumatoid Arthritis
74	Female	28.6919	22.2496	21.8146		Negative	Positive	Negative	Negative	Negative		173.372	34.3962	Rheumatoid Arthritis
50	Female	28.2072	12.2573	36.557		Positive	Negative	Positive		Negative	Positive	148.02	28.8533	Rheumatoid Arthritis
59	Male	27.8936	14.6994	33.7274	37.067	Positive	Positive	Negative	Negative	Negative			28.5564	Rheumatoid Arthritis
45	Female	37.4177	11.837	33.1566	22.1095	Positive	Negative	Negative	Positive	Negative	Positive	176.52	65.5035	Rheumatoid Arthritis
32	Female	33.519	18.8032	24.6233	30.3579		Positive	Positive	Positive	Positive	Positive	125.764	19.7014	Rheumatoid Arthritis
28	Female	31.9266	16.9748			Positive	Positive	Positive	Negative	Negative	Positive	195.096	17.2264	Rheumatoid Arthritis
69	Female	31.1268	21.4772	31.9624	37.2062	Positive	Negative	Positive		Positive	Positive	161.671	36.0011	Rheumatoid Arthritis
35	Male	34.3599	12.6251	30.5512		Positive		Positive	Negative	Positive		90.3089	22.5231	Rheumatoid Arthritis
49	Female	34.7568	12.8288	34.6243		Negative		Negative		Negative		191.513	52.2682	Rheumatoid Arthritis
58	Male	34.3049	23.375	37.9897	30.6175	Negative	Positive	Negative	Negative		Positive	98.9199	54.8822	Rheumatoid Arthritis
75	Female	36.5641	15.3231		31.1874	Negative	Negative	Negative			Positive	158.771	22.9683	Rheumatoid Arthritis
75	Male	33.9148	22.9472	38.3485	29.0537		Positive	Positive	Positive		Negative	100.008	34.411	Rheumatoid Arthritis
42	Female	33.1284	17.6632	34.546	29.8109		Positive		Positive			115.522		Rheumatoid Arthritis
31	Male	28.6335	11.3907	38.8718	34.5192	Negative	Positive	Positive	Negative	Negative	Negative	169.451		Rheumatoid Arthritis
41	Male	37.3344	15.578	21.6996	23.1435	Positive	Positive	Negative			Negative	153.355	73.593	Rheumatoid Arthritis
42	Male	32.5228	20.535	24.7908		Negative	Positive	Negative	Positive	Positive	Positive	112.527	54.1951	Rheumatoid Arthritis
33	Female	30.4855	27.8668	36.5585	28.6155	Negative	Positive	Positive	Positive	Negative		133.375	27.5878	Rheumatoid Arthritis
40	Male	39.0451	21.9048	21.2616			Negative	Negative		Negative	Positive	163.352	74.9504	Rheumatoid Arthritis
68	Female	37.8557	23.2216	30.6988		Positive	Positive	Negative	Positive	Positive	Positive	105.748	32.7358	Rheumatoid Arthritis
57	Male	26.3478		21.771	39.0745	Positive	Positive		Negative	Negative		123.313	53.9444	Rheumatoid Arthritis
48	Female	43.6923	14.5582	34.488		Positive	Positive	Positive	Negative	Positive	Negative	178.322	23.3098	Rheumatoid Arthritis
56	Female	48.3704	27.8142	38.3253	35.0483	Negative	Positive		Negative		Negative	159.467	14.3857	Rheumatoid Arthritis
31	Female	31.7764	22.6591	28.9771	39.2307	Positive		Positive	Positive			139.033	33.5705	Rheumatoid Arthritis
40	Female	40.2598	29.2276	33.1081	30.9065	Positive	Negative	Negative	Positive	Negative		188.152	63.9738	Rheumatoid Arthritis
58	Female	48.7335	21.2143	33.6024	26.753	Negative		Positive	Positive	Negative	Positive	201.564	60.7365	Rheumatoid Arthritis
54	Female	31.2929		26.2859	24.2694	Positive		Positive	Negative	Positive		191.598	15.2754	Rheumatoid Arthritis
30	Male	38.7257	11.101			Positive	Positive	Negative	Positive	Negative	Negative	164.505	23.3093	Rheumatoid Arthritis
21	Male		28.6577	36.7548	24.2907	Negative	Positive		Negative	Negative	Negative	110.896	21.0744	Rheumatoid Arthritis
52	Female	26.0362	22.2004	28.6159	30.7747	Positive			Positive		Positive		47.0372	Rheumatoid Arthritis
53	Male	40.7459	23.5812	24.3144		Negative	Positive	Positive	Positive	Positive		165.951	54.9147	Rheumatoid Arthritis
21	Male	36.6477	20.9692		31.2931		Positive		Negative	Positive	Negative	119.431		Rheumatoid Arthritis
64	Female	37.9888	23.8293	28.4397		Negative	Positive	Negative	Negative	Negative	Positive	124.165	50.5964	Rheumatoid Arthritis
33	Male	29.6308	20.6829	22.6648	31.5519	Negative	Negative	Negative	Positive		Negative	155.509		Rheumatoid Arthritis
74	Female	49.5759	18.9198	32.2242			Positive	Negative	Positive			194.388	13.17	Rheumatoid Arthritis
62	Female	38.2206	25.923	22.2694		Negative	Positive				Positive	145.879		Rheumatoid Arthritis
63	Female	46.4812	18.0235	26.737	35.5357	Negative	Negative	Positive	Positive		Positive	198.32	19.4363	Rheumatoid Arthritis
47	Male	47.7415		35.8981	25.0644	Positive	Negative	Positive	Negative		Negative	113.411	60.6322	Rheumatoid Arthritis
64	Male	28.6643	28.3671	27.9232	33.3943	Negative		Negative	Positive		Negative	115.621	34.2166	Rheumatoid Arthritis
23	Male			36.0607	33.8939	Positive	Negative	Negative		Positive	Negative	175.517	47.6193	Rheumatoid Arthritis
46	Female	48.9516	14.4547	39.76	32.8836	Positive	Negative	Negative	Positive			118.628	39.6131	Rheumatoid Arthritis
74	Female		17.9683	28.0225	38.1918	Negative		Positive	Positive	Negative	Positive	151.322	66.6713	Rheumatoid Arthritis
33	Female	29.1992	24.3281	30.0071	39.118	Positive	Positive		Negative			130.526	39.5215	Rheumatoid Arthritis
37	Male	31.2272	14.5022	32.9541	26.9527	Negative	Negative	Positive	Positive	Negative	Positive	167.386	47.2837	Rheumatoid Arthritis
31	Female		21.296	33.4986		Positive	Positive	Positive	Negative	Negative	Positive		23.6686	Rheumatoid Arthritis
47	Male	33.1241	17.3026	35.4704	25.8515	Positive	Positive					171.995	56.5617	Rheumatoid Arthritis
38	Female	26.661			28.3311		Positive		Negative	Positive		125.793	62.25	Rheumatoid Arthritis
71	Female	41.7066	17.0037	24.5643	33.2974	Positive	Positive	Positive	Positive			97.1281	30.8355	Rheumatoid Arthritis
22	Female	48.655	14.6172	27.9258	37.0544	Negative	Negative		Positive	Positive		164.03	54.5184	Rheumatoid Arthritis
59	Male			28.9701	29.992	Negative		Negative	Positive	Positive		102.949	67.5673	Rheumatoid Arthritis
55	Female	30.842	18.8813	25.1704		Positive	Negative	Negative	Negative	Positive	Positive	120.348	36.7713	Rheumatoid Arthritis
75	Male	29.2293	22.636	37.5442	35.1874	Negative	Negative		Positive			118.969	40.8683	Rheumatoid Arthritis
36	Female	36.1468	13.3197	29.0511	25.2369	Positive		Negative	Positive	Positive			36.5856	Rheumatoid Arthritis
78	Male	29.6142	19.3723		34.2626	Negative		Positive	Positive	Negative	Positive	137.577	30.965	Rheumatoid Arthritis
50	Female	37.1391		39.0545	28.505	Positive		Positive				161.839	64.9404	Rheumatoid Arthritis
59	Male	39.8337	20.4354	22.5871	31.5694		Negative					171.863	39.49	Rheumatoid Arthritis
71	Male	47.2923	25.9416	35.2141	29.929	Positive	Positive	Positive	Positive		Negative		71.8494	Rheumatoid Arthritis
63	Female	26.6301	16.9623	31.9987		Negative	Negative	Positive			Negative	116.383	21.4654	Rheumatoid Arthritis
21	Male	43.764	14.451	23.872	32.9038	Negative	Positive	Positive	Negative		Negative	135.805	19.7494	Rheumatoid Arthritis
48	Male	30.4146		27.9572	35.0278	Negative	Positive	Positive	Positive	Negative		91.1751	58.8555	Rheumatoid Arthritis
45	Female	30.4651	25.3724	21.5135	38.2296	Negative		Positive					70.1776	Rheumatoid Arthritis
33	Male	32.1571	17.951	22.663				Negative	Negative			150.516	69.7503	Rheumatoid Arthritis
34	Male	33.5373	13.4121		25.306	Positive	Negative	Positive		Positive		112.01	28.3277	Rheumatoid Arthritis
78	Male	29.8579		31.3255	35.1965	Negative		Positive	Positive	Positive	Positive	125.177	32.9971	Rheumatoid Arthritis
72	Male	43.677	19.9733	28.5432		Negative	Positive	Negative	Negative	Negative		101.39	29.3813	Rheumatoid Arthritis
25	Female	37.8965	22.0088	22.1816	39.9284	Negative	Positive	Negative		Negative		120.789	72.8138	Rheumatoid Arthritis
60	Female		14.0007	27.1991	30.3457	Positive	Negative	Positive	Positive	Positive	Positive	126.785	26.0719	Rheumatoid Arthritis
66	Male	35.1268		38.3276	36.1867	Positive			Positive			168.59	19.7268	Rheumatoid Arthritis
27	Female	36.9853	16.078	27.647	22.455				Positive	Negative	Negative	191.128	58.9493	Rheumatoid Arthritis
39	Female	27.5676		38.7412	31.911	Negative	Positive	Negative	Negative			138.928	41.8232	Rheumatoid Arthritis
58	Male	38.3044	27.4153	29.7091			Negative	Positive	Negative		Positive		71.9199	Rheumatoid Arthritis
79	Male	43.2793	20.465	30.1663	30.5939	Positive	Negative	Positive	Positive			143.179	53.9015	Rheumatoid Arthritis
80	Female	39.9402	20.9784	36.3697	21.0439		Negative	Positive	Negative	Negative		172.073	19.8376	Rheumatoid Arthritis
67	Female	33.9698	11.3382	29.3947	30.6584			Positive	Negative			159.629	46.1589	Rheumatoid Arthritis
65	Male	47.0795	15.1299	25.5359		Positive	Negative	Negative	Negative	Negative	Positive	179.728	39.9943	Rheumatoid Arthritis
25	Male		17.0616	34.9016		Negative		Negative			Negative	178.039	30.0879	Rheumatoid Arthritis
76	Female	37.9673	23.088	31.3488	32.5452		Positive	Negative			Negative	109.999	20.7275	Rheumatoid Arthritis
25	Female		11.1837	24.6898	21.4241	Negative		Positive				176.324	18.2008	Rheumatoid Arthritis
54	Male	33.2265		26.1547		Positive		Negative	Negative	Positive	Negative	183.308	58.2767	Rheumatoid Arthritis
69	Female	41.6927	18.0634	36.3704	33.7736	Negative	Negative	Positive		Negative	Positive	151.705	20.9306	Rheumatoid Arthritis
49	Male		12.9178	33.4949	25.3971	Negative		Negative	Positive		Negative	90.4453		Rheumatoid Arthritis
76	Male	30.2933		23.0914	23.4794	Positive		Negative		Positive	Positive			Rheumatoid Arthritis
23	Male	36.147	28.5014	22.0264		Positive					Positive	149.028		Rheumatoid Arthritis
48	Male		21.6715	28.8337		Positive	Negative		Negative	Positive	Negative	140.729	15.9104	Rheumatoid Arthritis
37	Male		21.5509	21.7006	38.7957	Negative		Positive	Positive	Positive			49.4926	Rheumatoid Arthritis
41	Male	29.9568		24.6961	30.8455	Negative								Rheumatoid Arthritis
50	Male	47.3598	28.6904	33.9872	39.7401	Negative	Negative	Positive	Positive		Positive	91.1664	70.4166	Rheumatoid Arthritis
20	Male	26.4206		33.8953	35.3574	Positive	Positive			Negative	Negative	173.107		Rheumatoid Arthritis
68	Male	27.0373		37.371	33.7997			Positive	Positive		Positive	103.83	16.2516	Rheumatoid Arthritis
37	Female	29.7383		36.267	26.1574	Negative	Negative			Positive		96.2944	24.7433	Rheumatoid Arthritis
71	Female	33.324	21.9785	31.4333	29.1465	Positive	Positive	Negative	Negative			139.381	21.9816	Rheumatoid Arthritis
49	Female		20.3718	27.3965			Negative		Negative			112.341	44.8475	Rheumatoid Arthritis
70	Female	30.1179	29.0745	28.5095	23.3173	Negative		Positive	Positive	Positive	Positive	88.3536		Rheumatoid Arthritis
42	Male	37.8192	22.9428	37.6097	21.4682	Positive	Positive	Negative	Negative	Positive		158.37	26.2579	Rheumatoid Arthritis
47	Male	31.9129	23.3646	27.9955		Negative	Positive	Negative	Positive	Negative	Negative	144.349		Rheumatoid Arthritis
56	Female	28.0673	28.6574	35.3835	39.073	Positive	Positive	Positive		Positive		168.889	59.6989	Rheumatoid Arthritis
71	Female	37.9447	16.9114		24.3629	Negative	Positive	Negative	Positive	Negative	Negative	113.761	15.4922	Rheumatoid Arthritis
66	Male	45.7236	12.6878	28.661	37.2654	Negative	Positive	Negative		Negative		135.428	34.1481	Rheumatoid Arthritis
37	Male	32.2574		27.0875	37.4242	Positive	Positive	Negative		Negative		138.245	66.1699	Rheumatoid Arthritis
65	Male	38.9935		23.6439	34.4266	Negative		Positive	Negative	Negative		128.709	53.8152	Rheumatoid Arthritis
76	Male	42.6905	21.0969	37.1448	30.7727	Positive			Positive		Negative	132.166	36.524	Rheumatoid Arthritis
45	Female	33.8087	18.4866	22.8611		Positive	Negative			Negative	Negative	116.79	61.4492	Rheumatoid Arthritis
23	Female	34.9969	16.4619	32.4097		Negative		Positive	Negative	Positive	Negative		61.5566	Rheumatoid Arthritis
55	Male	39.2452		27.0507	30.515		Negative	Negative		Positive		98.7431	60.1562	Rheumatoid Arthritis
66	Female	38.3235	24.4091	25.7024	39.3583			Positive	Positive	Negative		117.334	66.8601	Rheumatoid Arthritis
60	Female	37.4937	20.3353	37.0055		Positive	Negative	Positive	Positive	Positive		108.908	35.616	Rheumatoid Arthritis
31	Male	32.154	13.8278		26.7002	Negative	Positive	Positive				152.104	19.3718	Rheumatoid Arthritis
47	Male			24.8492	21.1893	Negative		Positive	Negative		Negative	95.6332	54.1401	Rheumatoid Arthritis
76	Female	49.17		34.0219	22.7973	Negative	Negative	Negative	Negative		Negative	110.426	40.2514	Rheumatoid Arthritis
33	Male	26.4551	29.0275	21.8156	32.5213	Positive	Positive	Negative	Negative		Negative	127.974	69.9226	Rheumatoid Arthritis
70	Male	30.3024	25.2219	30.4392			Negative	Positive	Negative	Negative		195.513	69.0537	Rheumatoid Arthritis
48	Female	48.5182	14.2001	27.8776			Negative	Negative	Negative			112.994	52.196	Rheumatoid Arthritis
28	Male	48.7705	15.1402		27.9553	Negative	Negative		Positive	Positive	Negative	165.6	16.8045	Rheumatoid Arthritis
33	Male	33.7558	19.674	39.6225		Negative	Positive		Negative	Negative		189.942	51.4887	Rheumatoid Arthritis
72	Female	27.3882	12.6991	29.9397	28.2963	Negative	Negative		Negative			167.143		Rheumatoid Arthritis
55	Female	39.2472	28.5281	24.0246	37.962	Negative	Positive	Positive	Positive			160.199		Rheumatoid Arthritis
63	Male	30.0179		26.4403	36.6561	Negative		Negative	Positive	Positive	Positive	152.463	59.6518	Rheumatoid Arthritis
28	Male	46.7793	24.5533	36.3938				Positive	Positive	Positive			63.8154	Rheumatoid Arthritis
22	Male	36.2952	17.6462	34.1807	34.7677	Positive	Positive	Negative	Negative				70.6315	Rheumatoid Arthritis
60	Female	39.6558	26.7695	35.1673			Positive	Negative	Positive		Positive	152.691	21.0482	Rheumatoid Arthritis
49	Male	35.8965	29.6321	22.6217	22.8527		Negative		Negative	Negative	Positive	103.286	13.1264	Rheumatoid Arthritis
79	Male	49.8651	16.6498	22.5333	24.3754	Positive	Negative			Negative		176.063	12.7342	Rheumatoid Arthritis
27	Male	28.994		21.0036		Positive	Positive	Positive	Positive	Negative		171.143	40.271	Rheumatoid Arthritis
53	Male	36.4887	24.7773	21.8012	25.909	Negative		Negative		Negative		193.289	63.1867	Rheumatoid Arthritis
79	Male	37.1756	28.7115	26.6949	29.0767	Negative			Negative		Negative	145.401	16.7368	Rheumatoid Arthritis
68	Male	27.8002	13.6656	30.5387	22.1375	Negative	Negative	Negative	Positive			158.519	44.9638	Rheumatoid Arthritis
35	Female	33.5879	24.6756	37.5206	27.4597		Positive	Negative	Positive	Negative		156.014	59.4929	Rheumatoid Arthritis
58	Male	31.6163	18.3934	30.9551	33.2131	Negative	Positive	Negative		Negative	Negative	99.0042		Rheumatoid Arthritis
35	Female	38.493		28.683		Negative		Negative	Positive	Positive		173.824		Rheumatoid Arthritis
67	Female	36.0511	13.0099	25.8328	32.9771		Negative		Negative			104.503		Rheumatoid Arthritis
66	Male	36.2689	24.647	33.9261	23.6824	Negative	Positive	Positive	Negative	Positive			41.4869	Rheumatoid Arthritis
51	Male	33.5384		34.6975	32.7411	Negative	Positive	Positive	Positive			121.35	25.2071	Rheumatoid Arthritis
67	Female	49.8447		37.1223		Negative				Positive		119.085	19.0155	Rheumatoid Arthritis
26	Male	29.639	20.8403	38.5292	39.9883	Negative	Positive	Positive	Negative			143.011	47.4677	Rheumatoid Arthritis
64	Female	38.4598	19.1816	28.889		Negative	Positive	Positive	Negative	Negative		174.16	22.4462	Rheumatoid Arthritis
42	Male		19.6177	21.8135	29.6358	Negative		Negative	Positive		Positive	170.3	54.8725	Rheumatoid Arthritis
66	Male	37.8858	14.6158	35.4609			Positive			Positive			24.1176	Rheumatoid Arthritis
50	Female	39.7424	23.987	21.512	27.2742	Positive	Positive	Positive				125.702	55.5693	Rheumatoid Arthritis
42	Female	44.0638		35.1721	21.2619	Positive		Positive		Positive		135.881	47.1431	Rheumatoid Arthritis
26	Male	26.6181	21.3596	23.1675				Negative			Positive	109.496		Rheumatoid Arthritis
31	Female	31.8126	11.3169	22.0584	35.8494	Negative	Positive	Positive	Positive		Negative	107.163	62.1393	Rheumatoid Arthritis
80	Female		27.5656			Positive		Negative	Negative		Negative	104.514	26.9884	Rheumatoid Arthritis
58	Female		16.9264	27.1756	34.2135	Positive	Negative		Negative		Positive	173.37	56.8731	Rheumatoid Arthritis
73	Male	36.6826		37.0521	37.3818	Positive	Negative		Negative	Positive	Positive		66.1988	Rheumatoid Arthritis
32	Male		27.5457	26.8662	24.898	Positive	Negative	Negative	Negative		Negative	138.506		Rheumatoid Arthritis
61	Male	34.4563	14.732	32.1999	33.1965	Negative			Negative	Negative		135.519	74.9805	Rheumatoid Arthritis
55	Male	32.6177	23.0591	22.742	29.0028	Negative	Positive	Positive				176.499	28.376	Rheumatoid Arthritis
50	Male	37.726	11.8974	38.6366	29.4472	Negative	Positive			Negative	Positive		65.9498	Rheumatoid Arthritis
30	Female	37.9462	28.4592	32.5241			Negative	Negative	Negative	Negative			38.6116	Rheumatoid Arthritis
26	Female	38.3392	26.3208	32.1514	38.7462	Positive		Negative	Negative			173.723	55.9777	Rheumatoid Arthritis
78	Female	43.6738	19.6992	37.5613	25.5129	Negative				Positive		132.819	39.3912	Rheumatoid Arthritis
45	Female	30.4946	25.3276	35.8854	29.1685	Negative			Positive		Positive	138.889	20.4346	Rheumatoid Arthritis
54	Male	30.9089	14.4285			Negative	Negative	Positive			Positive	97.9517		Rheumatoid Arthritis
59	Male	35.9489		22.7194	36.9895	Positive		Negative	Positive	Negative		169.675	46.049	Rheumatoid Arthritis
20	Female	49.0224	29.6602	39.1535		Positive	Negative	Negative	Positive	Positive	Negative	205.784	61.0073	Rheumatoid Arthritis
27	Female	28.3395	15.0802	36.1404		Positive	Negative		Negative	Negative	Negative	116.957	38.0709	Rheumatoid Arthritis
57	Male	36.078	20.3692			Negative			Negative			123.295	34.525	Rheumatoid Arthritis
25	Male	38.287	17.5067	39.0393	21.9236	Positive	Positive		Positive		Positive	117.559	56.1876	Rheumatoid Arthritis
34	Female	47.7647	12.2692		22.4682	Negative	Positive		Positive	Positive	Negative	97.2588	41.383	Rheumatoid Arthritis
34	Male	34.9007	18.142	21.5117	32.1756	Positive			Positive	Positive		115.161	54.2458	Rheumatoid Arthritis
74	Male		18.2069	25.9378	29.554	Positive	Positive	Positive	Positive			109.859	31.3375	Rheumatoid Arthritis
73	Male	37.1531	18.4166	36.2746			Negative	Positive	Negative	Negative		116.718		Rheumatoid Arthritis
59	Female	48.3672			36.4235	Negative	Negative	Positive	Positive		Negative	107.472	13.8372	Rheumatoid Arthritis
25	Male	30.2869	17.9216	27.065		Positive	Negative		Positive	Positive		95.1031	64.9663	Rheumatoid Arthritis
56	Female	48.6011			24.5294	Negative		Positive	Positive		Negative	190.471	23.834	Rheumatoid Arthritis
66	Male	31.782	22.6673	22.1156	35.275	Positive	Negative	Negative			Positive	154.965	59.3387	Rheumatoid Arthritis
31	Female		24.2683	37.7317	36.834		Negative	Negative	Negative	Negative		138.21	30.9918	Rheumatoid Arthritis
66	Female	32.9665	23.035	24.395		Positive	Negative	Positive	Positive	Negative			37.5277	Rheumatoid Arthritis
52	Male	32.8402	12.4028	33.4089	38.1054	Negative	Negative	Positive	Negative			200.66	73.0441	Rheumatoid Arthritis
71	Male	26.1841	29.6394	25.0297	36.5544		Positive		Negative	Negative		131.95	18.3791	Rheumatoid Arthritis
37	Male	40.7373	18.1222	21.7857		Negative	Positive			Positive	Negative	179.236	35.9506	Rheumatoid Arthritis
52	Male	34.6034	27.8397	24.3296		Negative	Negative	Positive		Negative	Negative	117.389	54.7088	Rheumatoid Arthritis
49	Male	42.9482		38.219	39.5218	Positive	Negative		Positive			161.68		Rheumatoid Arthritis
27	Male			33.5115	27.1223	Positive	Positive	Negative	Positive		Negative	153.497	35.4345	Rheumatoid Arthritis
47	Male	30.1066	14.0268	26.1657	24.7279			Negative	Negative	Positive	Positive	161.537	60.7003	Rheumatoid Arthritis
52	Male	47.3174		27.7263		Positive		Positive		Positive	Positive	157.303	49.1083	Rheumatoid Arthritis
24	Female	34.5965					Positive	Negative				176.24	34.4353	Rheumatoid Arthritis
64	Male	45.4311	13.6689	24.834			Positive	Positive	Positive	Positive	Positive	97.3283	67.0666	Rheumatoid Arthritis
31	Female	28.464	15.8463	21.1636	31.4633	Positive		Positive	Negative	Positive	Negative	147.03	33.6879	Rheumatoid Arthritis
68	Female	29.0138	18.281	29.0052		Negative	Positive	Negative	Positive	Negative	Positive	149.471		Rheumatoid Arthritis
33	Male	40.806	11.7609	29.6236	33.0444		Positive	Negative		Negative			61.8041	Rheumatoid Arthritis
62	Male	29.9302		25.4351	25.2033	Positive				Positive		158.178		Rheumatoid Arthritis
35	Female	30.543	15.737	22.6466		Negative	Negative		Positive		Positive	151.187	32.8525	Rheumatoid Arthritis
26	Male	48.6939	29.8443	33.1931		Positive			Negative	Positive			70.8125	Rheumatoid Arthritis
53	Male	34.0348	14.8896	38.5496	29.4472	Positive		Negative	Positive		Negative	159.024	71.011	Rheumatoid Arthritis
77	Male	40.4679	18.1528	36.081	33.0274	Negative	Positive		Positive	Positive	Negative		46.2526	Rheumatoid Arthritis
39	Female	32.4366	19.1066	37.2305	39.1595	Negative			Positive	Positive			19.2912	Rheumatoid Arthritis
67	Female	46.1409	20.7916	35.4449	22.4437	Positive	Positive	Positive	Positive		Negative	173.723	64.6115	Rheumatoid Arthritis
36	Male	45.1276	17.1965	32.5154	28.467	Positive	Negative	Negative	Positive	Positive	Negative	151.035	54.5387	Rheumatoid Arthritis
67	Female	39.8258	21.3409	34.1903	32.6355		Negative	Positive	Negative	Negative	Negative	138.537		Rheumatoid Arthritis
75	Male			26.1835		Positive		Positive	Positive		Negative	149.507		Rheumatoid Arthritis
52	Male	37.1127	29.4132	38.5114	39.26	Positive	Positive		Negative		Negative	94.8708	23.5868	Rheumatoid Arthritis
37	Female	31.4571	24.7675	22.3116	22.6865		Negative	Positive	Negative			139.932	20.9323	Rheumatoid Arthritis
65	Female	38.102	20.0165	26.4919	27.4065	Negative		Negative	Positive	Positive	Positive		13.6204	Rheumatoid Arthritis
56	Female	38.3759	11.5801	39.5994		Positive			Positive			132.304		Rheumatoid Arthritis
32	Female	29.6685	29.3678	35.9655		Negative	Positive		Positive	Negative	Negative	99.4389	20.6864	Rheumatoid Arthritis
53	Male	33.0776	12.7739	28.0016	35.9796	Positive		Negative	Positive		Positive	155.292	37.6278	Rheumatoid Arthritis
38	Male	44.6048	11.7726	22.1918		Positive	Positive	Positive	Positive	Negative		91.3618	17.3223	Rheumatoid Arthritis
55	Female	48.7387	28.2853	27.6801	39.2572	Positive	Negative	Positive	Negative	Positive	Negative	112.977	32.8921	Rheumatoid Arthritis
71	Female	38.5431	13.531	38.8763	29.8662	Negative	Positive	Positive	Negative	Negative		149.111	17.0658	Rheumatoid Arthritis
20	Female	33.799			29.0373	Negative	Negative		Negative	Positive		118.391		Rheumatoid Arthritis
31	Female	30.328	23.8009	21.2481	23.5942	Positive	Negative	Positive	Negative	Negative	Negative	140.711	56.0618	Rheumatoid Arthritis
67	Male	29.8364	18.7344	38.6989	37.3857		Positive	Negative	Positive		Negative	98.6189	41.8141	Rheumatoid Arthritis
20	Female	47.4951	16.7019	36.723	29.1516	Negative	Negative	Negative	Negative	Positive	Negative	94.2545	19.3722	Rheumatoid Arthritis
23	Male	31.5682	20.9012	27.3509	39.7691	Positive		Negative				156.549		Rheumatoid Arthritis
46	Female	30.484	23.7022	26.0028		Positive	Positive	Negative	Positive			152.714	31.723	Rheumatoid Arthritis
35	Female	36.7966	12.9325	25.1686	32.3027	Negative	Negative	Positive		Negative		101.346	22.3081	Rheumatoid Arthritis
43	Female	27.7033	18.895	21.3088	37.9967	Positive		Positive	Positive		Positive	109.755	32.8582	Rheumatoid Arthritis
33	Female	27.8516	18.8077	22.9683	21.6601	Positive	Positive	Positive	Positive	Positive	Negative	162.231	30.0425	Rheumatoid Arthritis
57	Female		17.7292	27.2275	34.4134	Negative	Negative	Positive				165.38		Rheumatoid Arthritis
63	Male		15.3067	23.5676	37.5927	Negative		Positive	Negative	Positive		179.862	46.9875	Rheumatoid Arthritis
75	Male	26.7881	13.1585	34.71	35.3362	Negative	Negative	Positive	Negative	Positive	Negative		42.7436	Rheumatoid Arthritis
67	Female			21.516	28.7373	Negative	Positive	Negative	Positive			123.647	51.048	Rheumatoid Arthritis
50	Female		20.83	27.0344	29.4399	Positive	Positive	Positive	Negative		Negative		59.9616	Rheumatoid Arthritis
75	Female	47.6463	14.5674	35.7662		Negative	Positive		Negative	Negative			20.2086	Rheumatoid Arthritis
43	Female	49.2521	21.4681	24.8828	37.7673	Positive	Negative	Negative	Positive	Positive	Negative	169.686	65.3711	Rheumatoid Arthritis
73	Male	30.6072		33.9386	35.2116	Negative	Negative	Negative	Positive	Negative		137.697	70.615	Rheumatoid Arthritis
71	Male	29.1374	21.3187	25.5424	27.3641	Negative					Negative	140.76	44.1035	Rheumatoid Arthritis
56	Female	26.4359		24.4892	25.0058	Negative	Negative	Negative		Positive		135.621	48.3776	Rheumatoid Arthritis
49	Male	29.5999	28.5837	33.0337		Positive			Negative	Negative		122.067	38.3743	Rheumatoid Arthritis
60	Female	35.5903		24.4492		Negative		Negative	Positive	Negative	Negative	97.1431	18.6237	Rheumatoid Arthritis
33	Female	48.3667	29.9672	32.4858	39.6121		Negative	Negative	Positive	Negative	Positive	95.8478		Rheumatoid Arthritis
20	Male	29.2997	17.9465	37.2238	31.2492	Negative	Negative			Negative	Negative	108.909	41.8452	Rheumatoid Arthritis
24	Male	48.0341		39.657		Negative	Negative	Positive	Positive	Negative		139.606		Rheumatoid Arthritis
67	Male	43.3434		29.8915	35.5429	Positive		Positive	Positive	Positive	Negative	97.3475	53.0445	Rheumatoid Arthritis
35	Female		22.2066	39.4849	32.8737	Positive		Positive	Negative	Negative	Positive	103.069	54.7095	Rheumatoid Arthritis
69	Male	39.6127	21.4595	31.0357	29.4389	Positive			Positive			149.194	20.3306	Rheumatoid Arthritis
71	Male	43.7722	16.6983	37.2073			Negative	Negative	Positive		Negative	177.733	64.4407	Rheumatoid Arthritis
80	Male	26.6963	22.869	31.778			Positive	Negative			Positive	169.205	65.3174	Rheumatoid Arthritis
57	Female	33.8296		21.9585	37.8012	Negative		Positive	Positive	Negative			14.3614	Rheumatoid Arthritis
27	Female		13.476	35.8872	38.1271	Negative	Negative		Positive		Negative	108.687	69.7528	Rheumatoid Arthritis
45	Female	34.4795	16.9764	31.5203	23.0494	Negative		Negative	Negative	Positive	Positive	118.367	37.6918	Rheumatoid Arthritis
27	Female	26.0987		33.5263	34.164					Negative		99.9369	36.7522	Rheumatoid Arthritis
47	Male	33.2308	29.9907	28.0481		Negative		Positive	Positive	Positive		97.4769	37.5607	Rheumatoid Arthritis
34	Female	29.4766	16.9174	25.8028		Positive		Positive	Negative	Positive	Negative	108.732	34.1885	Rheumatoid Arthritis
37	Female	27.9254			30.5724	Positive		Negative			Positive	160.015	42.88	Rheumatoid Arthritis
66	Female	36.516	28.3117	22.9949		Positive						98.6992	53.4719	Rheumatoid Arthritis
28	Female	40.428	14.9858	28.4679	29.0194	Negative	Negative	Positive	Positive	Negative	Negative	129.503	56.5836	Rheumatoid Arthritis
47	Male	32.4321	24.7711	36.429	23.2642	Positive		Positive	Negative	Negative	Negative	177.595	27.6776	Rheumatoid Arthritis
70	Female	26.8557	22.539	31.6524	37.36			Positive	Negative			117.838	65.9653	Rheumatoid Arthritis
66	Male	33.8043	22.7205	28.0486		Negative	Positive		Negative	Positive		113.912	30.101	Rheumatoid Arthritis
46	Male	30.434		33.0407		Positive	Negative	Negative		Negative	Negative	119.883	30.4081	Rheumatoid Arthritis
21	Male	27.4209	18.6952	36.1339	39.6838	Negative	Negative				Negative	112.978	21.9473	Rheumatoid Arthritis
61	Male	29.9714	23.4828	23.1814	24.5041	Negative		Positive	Positive	Negative	Negative	169.106	63.4195	Rheumatoid Arthritis
78	Female	39.1063		27.4453	33.182		Positive	Negative	Positive	Negative	Positive	167.422	64.8604	Rheumatoid Arthritis
77	Female	35.1214	24.4972	33.9477	29.5542				Positive	Positive		113.313	54.1239	Rheumatoid Arthritis
42	Male	30.3935	17.7057	26.6128	25.1223	Positive	Positive	Positive	Positive	Positive	Negative		63.7199	Rheumatoid Arthritis
62	Female	44.3448		24.3521		Negative			Negative					Rheumatoid Arthritis
30	Male	37.2589	25.7938	22.1916	26.8366	Positive		Negative	Negative	Positive	Positive	149.325	47.8492	Rheumatoid Arthritis
29	Male	32.6162			27.4549		Negative	Negative				96.4388	20.1967	Rheumatoid Arthritis
73	Male	41.845	28.9453	21.9709		Positive		Negative	Negative		Negative	118.834		Rheumatoid Arthritis
63	Female	39.8325	17.2302	38.6876	22.2448	Negative	Positive	Positive	Negative		Negative	147.809	16.0268	Rheumatoid Arthritis
42	Male	36.4491	28.0746	24.2063	28.1182	Positive		Negative	Negative		Positive		37.8276	Rheumatoid Arthritis
79	Male	33.9153	15.6175	32.9053	34.2777	Positive		Negative				122.523	12.0728	Rheumatoid Arthritis
69	Female	33.4669	14.1284	33.6366	34.2727		Positive	Negative	Negative			125.728	21.649	Rheumatoid Arthritis
53	Female		28.0278	34.6144	32.3951		Negative	Negative	Positive	Positive	Positive	104.615	62.1024	Rheumatoid Arthritis
44	Female	42.8496	19.9486		28.213		Positive	Positive	Positive		Negative	139.123	35.2032	Rheumatoid Arthritis
55	Male	26.8436			38.098	Positive	Positive	Positive	Positive	Positive	Positive	93.354	61.1868	Rheumatoid Arthritis
60	Male	26.9491		35.2058	26.4805	Negative		Negative	Negative	Positive	Positive		17.6955	Rheumatoid Arthritis
67	Male		16.8484	31.2341	21.5695	Positive	Positive	Negative	Negative	Negative		191.371	29.1549	Rheumatoid Arthritis
35	Male	32.6471		30.7178	23.9814	Positive	Negative	Positive	Positive				29.5893	Rheumatoid Arthritis
32	Female		25.6483	39.5431		Positive	Negative	Positive	Positive	Negative	Positive		56.1334	Rheumatoid Arthritis
73	Female	26.9239	18.599	25.7653	21.717	Negative	Positive		Positive	Negative		191.762	40.2611	Rheumatoid Arthritis
31	Female	38.7869	13.991			Negative			Positive		Negative	156.408	59.5721	Rheumatoid Arthritis
45	Male	31.6881	15.3895	26.6208	30.6662	Negative			Negative	Positive	Positive		31.6517	Rheumatoid Arthritis
28	Male	32.5861	16.6414			Positive	Positive	Negative		Positive		161.678		Rheumatoid Arthritis
66	Female	49.2351	19.3938	36.2177		Positive	Negative	Negative		Negative	Positive	96.8028		Rheumatoid Arthritis
46	Female	39.0279	26.3216	23.4591	31.1983	Negative	Positive	Positive	Positive	Positive				Rheumatoid Arthritis
70	Female			39.6807	21.1369	Negative				Positive		125.603	50.8206	Rheumatoid Arthritis
23	Female	26.2073	19.6958	29.3514	39.6368	Negative							43.1447	Rheumatoid Arthritis
67	Male	31.692	22.5068	35.4753	27.6291	Positive		Positive		Negative	Negative	143.358	50.5885	Rheumatoid Arthritis
30	Male	27.9932	19.3911	32.7502	39.195	Positive		Negative	Positive	Negative		153.435	72.5196	Rheumatoid Arthritis
58	Female		27.2232	34.4083	24.3615		Positive	Negative	Negative	Positive	Negative	130.632	19.5784	Rheumatoid Arthritis
27	Female		24.4032	30.9342	24.7305	Positive	Positive	Negative				157.868	42.1749	Rheumatoid Arthritis
44	Female	35.6882	28.782	39.4494	22.4122	Negative		Positive		Positive			63.3763	Rheumatoid Arthritis
46	Female	32.7889	21.6625	36.7447		Negative		Positive	Positive			143.56	45.0739	Rheumatoid Arthritis
80	Female	37.5241	28.9106	22.1099	23.0034	Positive	Negative	Negative	Negative	Negative	Positive	153.528	70.387	Rheumatoid Arthritis
67	Female	31.8435	14.5208			Negative		Negative	Negative		Negative	180.716		Rheumatoid Arthritis
75	Male	27.9015	14.606	31.8175		Positive	Negative	Positive	Positive	Negative	Positive	151.943		Rheumatoid Arthritis
25	Female	39.1192	21.8517	31.3614	37.5682	Positive	Positive	Negative			Positive	136.786	53.2014	Rheumatoid Arthritis
77	Male	36.3905		22.5595	39.8197	Negative	Positive	Negative	Positive			169.041	64.717	Rheumatoid Arthritis
49	Male	32.3238		37.8445	38.6195	Negative	Positive	Negative	Negative				66.2357	Rheumatoid Arthritis
44	Male	29.3047	29.2935	37.692	30.1763	Positive			Negative				40.247	Rheumatoid Arthritis
70	Female	29.5026	24.0089	23.7486	29.3245	Positive					Negative	142.669	54.7526	Rheumatoid Arthritis
38	Female	31.5716	19.435	37.4774	26.3727	Positive	Positive	Positive	Positive	Negative	Negative	170.792	13.2438	Rheumatoid Arthritis
53	Female	45.6918	28.1858		30.462	Positive	Negative	Positive	Negative	Positive	Positive	94.4236		Rheumatoid Arthritis
50	Male	46.6302	21.0088	37.0543	28.4003	Negative	Positive	Positive	Negative	Positive	Negative	161.514	67.1965	Rheumatoid Arthritis
48	Male	35.8483		30.4983	34.7592	Positive		Negative	Negative		Positive		54.425	Rheumatoid Arthritis
68	Male	28.6272	27.7873	36.2705	34.4873	Negative	Positive	Negative	Negative	Positive		154.142	31.4879	Rheumatoid Arthritis
23	Male	37.2371	22.6793	35.3526	27.9523	Positive		Negative		Positive	Negative		69.1985	Rheumatoid Arthritis
41	Female	36.7555	14.5075	23.4728	38.7043	Negative		Positive	Negative	Positive		158.272	17.7366	Rheumatoid Arthritis
76	Male	29.8425	29.9113	24.7678	26.7311	Positive		Negative	Positive	Positive		162.787	28.0747	Rheumatoid Arthritis
75	Male	33.9296	23.1554	24.7675	24.5114	Negative	Positive	Negative	Negative			92.364		Rheumatoid Arthritis
74	Male	33.707		25.4366		Negative	Negative	Negative		Negative	Negative	160.852	23.5737	Rheumatoid Arthritis
37	Male	46.1474		24.6092	25.6517	Negative	Positive	Positive	Positive	Positive	Positive	107.874	48.0018	Rheumatoid Arthritis
58	Female	28.722	22.9666		27.8375	Positive		Positive	Positive	Negative	Negative	185.819	25.97	Rheumatoid Arthritis
50	Female		15.428		36.8573	Positive	Positive	Negative	Positive	Positive		111.608	64.7344	Rheumatoid Arthritis
30	Female	36.7705	11.3231	39.54	37.5378	Positive	Negative		Positive	Negative	Negative	97.0283	27.5968	Rheumatoid Arthritis
74	Male	32.3026	28.3887	22.5773	30.2983	Positive	Negative	Positive	Positive	Positive		90.3841	47.4483	Rheumatoid Arthritis
20	Male	45.0425		21.4178	39.8313	Negative	Negative	Negative	Negative			148.901		Rheumatoid Arthritis
37	Female	46.1421	14.2701		23.2226	Positive	Positive	Negative	Positive	Negative		195.001	29.6069	Rheumatoid Arthritis
52	Female	28.1951	14.02	31.9919	36.4437	Positive		Positive		Negative			20.9465	Rheumatoid Arthritis
28	Female	31.7479	26.7967	32.4297	36.4134	Negative	Negative	Positive	Positive		Negative		66.604	Rheumatoid Arthritis
57	Female	30.9293	16.0354	35.261		Negative	Positive		Positive	Negative	Negative	104.901	34.0603	Rheumatoid Arthritis
35	Male	34.247		31.7947		Negative	Negative	Positive	Negative	Positive	Negative		15.6789	Rheumatoid Arthritis
55	Female	31.5912	24.2813	26.3119		Negative	Negative			Negative		160.227	33.6412	Rheumatoid Arthritis
58	Male	42.9346	21.8403	27.1972	35.4593		Positive	Negative		Positive		194.835	24.2645	Rheumatoid Arthritis
64	Male	49.0721	16.0721	33.4776	24.5494	Negative	Negative		Negative			176.57	20.9871	Rheumatoid Arthritis
23	Male				25.1443	Positive	Positive		Positive	Positive		154.044	46.2904	Rheumatoid Arthritis
47	Male	39.9532	29.7764	26.3892	32.9335	Negative	Positive		Positive	Positive	Positive	100.875	56.051	Rheumatoid Arthritis
52	Male	37.2065	23.8641	39.4206	29.0828	Positive		Positive		Positive		129.233	14.4508	Rheumatoid Arthritis
47	Female	34.2623		36.5041	31.6293	Negative		Positive	Positive	Negative	Negative	101.703		Rheumatoid Arthritis
37	Female	37.5512	27.7687		34.2713	Negative	Negative	Negative	Positive	Positive		143.646	39.1257	Rheumatoid Arthritis
68	Male	29.3722	25.5306	35.6702		Positive	Positive	Positive		Negative	Negative	145.689	24.6709	Rheumatoid Arthritis
47	Male	28.3835	21.4533		38.1704	Positive	Negative		Negative			107.742	44.8933	Rheumatoid Arthritis
50	Male	32.3227	16.2877	34.0047	38.536	Negative			Positive		Positive		22.4761	Rheumatoid Arthritis
72	Male	33.7954		31.8265	38.1284	Positive	Negative					138.666	19.2527	Rheumatoid Arthritis
51	Female	37.9986	11.1175	31.9941	24.6924	Negative	Positive	Negative	Positive		Positive	179.627	27.745	Rheumatoid Arthritis
38	Male	34.3376	24.0936	26.3064	26.571				Positive	Positive	Positive	155.846	55.9161	Rheumatoid Arthritis
41	Male	33.3799	22.2749	26.7529	36.4253	Negative		Negative				121.561		Rheumatoid Arthritis
40	Female	30.7777	15.0734	22.1621		Positive	Negative	Positive	Positive	Negative	Negative	90.567	30.2462	Rheumatoid Arthritis
60	Male	35.0577	22.7263	32.014			Positive	Negative		Positive			63.5912	Rheumatoid Arthritis
64	Male	29.8709	28.1978	27.9767	25.0991	Positive	Positive	Positive	Negative			193.036	71.8515	Rheumatoid Arthritis
54	Male		12.4536			Positive	Positive	Positive			Positive		59.6607	Rheumatoid Arthritis
67	Male	42.3704	27.6955	23.8606				Positive	Positive	Positive		151.575	23.866	Rheumatoid Arthritis
23	Male	29.8706		26.5404		Positive		Negative	Positive	Positive	Negative	152.607	16.7434	Rheumatoid Arthritis
70	Male	26.9901	13.5605		29.7267	Positive	Negative	Positive	Positive	Negative		141.757	20.2247	Rheumatoid Arthritis
72	Male	30.2262	28.0895	32.8848	25.8986	Negative			Negative	Negative	Positive	202.447	64.1948	Rheumatoid Arthritis
63	Male	30.9393	13.0744	28.228	25.1122	Positive	Positive	Negative	Negative	Positive		143.043		Rheumatoid Arthritis
22	Female	30.358		34.1568	26.0732			Negative	Positive		Positive	160.233	30.8483	Rheumatoid Arthritis
25	Male	39.725		30.5098		Negative	Positive	Negative		Positive			34.1845	Rheumatoid Arthritis
72	Male	39.1455		23.4039	34.1456	Negative		Positive	Negative			174.489	16.3507	Rheumatoid Arthritis
44	Female	46.1731	16.0502	24.0365	33.9927	Positive		Positive	Positive	Negative	Negative	165.257		Rheumatoid Arthritis
35	Male	28.4534	26.5486	35.9244		Positive	Positive	Positive	Negative		Positive		64.356	Rheumatoid Arthritis
48	Female		24.2188	30.876	27.7338	Negative	Negative		Positive	Positive	Negative	159.111	38.4358	Rheumatoid Arthritis
73	Male	32.1061		33.3531	22.4831	Positive	Negative	Negative		Positive	Negative	179.06	44.9764	Rheumatoid Arthritis
33	Male	41.5502	24.6258	37.6505	25.9433	Positive	Positive	Positive	Negative	Negative		132.015	37.3909	Rheumatoid Arthritis
57	Female	29.1227	19.8168	24.7869	29.3746		Negative	Positive	Positive			112.585	33.6785	Rheumatoid Arthritis
36	Male	47.5582	16.8424	33.3852	25.7378	Positive	Positive			Negative		96.7511	52.9437	Rheumatoid Arthritis
68	Male	30.333	15.4969	29.4403	35.0256	Positive		Positive			Negative	111.673	17.5887	Rheumatoid Arthritis
50	Female	41.2214	19.3697		23.1477	Negative	Negative	Positive		Positive			21.656	Rheumatoid Arthritis
67	Male	31.0641	21.1092	32.6755	27.2562	Positive	Positive	Negative			Negative	103.898	71.8045	Rheumatoid Arthritis
47	Female	30.2842	13.9869	23.0928	28.8755	Positive	Positive			Negative	Negative	104.648	25.41	Rheumatoid Arthritis
60	Female	44.7296		38.7555		Positive	Positive	Positive	Positive		Positive	135.348	55.9086	Rheumatoid Arthritis
72	Male	30.1267		30.9884		Positive	Positive	Positive	Negative	Negative		128.584	14.1806	Rheumatoid Arthritis
62	Female	42.8017	20.78	23.6272		Positive	Negative	Positive					62.2822	Rheumatoid Arthritis
38	Male	27.1378	12.1644	21.159	23.9277		Negative	Negative	Negative	Positive		114.743	36.0894	Rheumatoid Arthritis
52	Male	29.9321	28.0071	31.5098	35.0884	Positive	Positive	Negative	Positive	Negative	Negative	133.248		Rheumatoid Arthritis
55	Male	31.4928	27.9983	23.0394	38.9552	Positive	Negative		Positive	Negative		116.391		Rheumatoid Arthritis
79	Male	37.3593	16.9755	33.8176	24.0906	Negative	Negative		Negative	Positive	Positive		30.7903	Rheumatoid Arthritis
66	Male	49.5574	16.0374	22.2947	27.7448	Positive	Negative		Negative	Positive		172.963	51.5768	Rheumatoid Arthritis
40	Female	30.5446	18.0947	31.8236		Negative		Negative	Positive	Positive	Positive	115.757	37.4403	Rheumatoid Arthritis
51	Male	42.504	29.4579	32.9718	26.667	Positive		Positive	Negative	Positive	Negative	161.041	57.4843	Rheumatoid Arthritis
56	Female	35.4391		32.5193	27.5223	Negative	Negative	Positive	Negative	Positive		118.052	26.1494	Rheumatoid Arthritis
68	Female	48.436	28.8319	23.3167	38.0671	Positive	Positive				Negative	163.267	24.2843	Rheumatoid Arthritis
52	Female	36.3268	17.5876	24.121				Negative	Negative	Positive		188.008	42.8157	Rheumatoid Arthritis
20	Female	37.8643	23.3003			Positive			Positive	Positive	Negative	175.836	66.5638	Rheumatoid Arthritis
31	Male	30.3379	12.0106	36.5868	29.663		Positive	Negative	Positive			190.732		Rheumatoid Arthritis
43	Female		11.8176	28.8732	26.6249		Negative	Positive	Negative	Negative		176.528		Rheumatoid Arthritis
31	Male	29.7307	20.9232	22.6617	38.2831	Positive	Negative				Positive	174.927	44.9663	Rheumatoid Arthritis
75	Male	38.2987	26.256	24.1893	23.6324	Positive	Positive	Positive	Negative	Positive	Negative	141.851	25.1594	Rheumatoid Arthritis
48	Male	35.1455	11.5292	22.9631	32.7816	Negative	Positive			Positive		107.715	45.9087	Rheumatoid Arthritis
54	Male	32.3524	29.9872	23.9822		Negative	Negative	Negative	Positive	Positive		156.468	30.2625	Rheumatoid Arthritis
79	Female	29.9491	17.116	35.8229	39.8871	Negative	Negative		Positive	Positive			16.0459	Rheumatoid Arthritis
51	Female	45.733	18.7476		35.2682	Negative	Negative	Positive	Positive	Positive	Positive	118.584	28.7474	Rheumatoid Arthritis
68	Male	37.5808				Positive	Negative	Negative	Negative		Positive		19.9087	Rheumatoid Arthritis
23	Male	36.6773	16.0347			Positive		Negative	Positive	Positive			61.2912	Rheumatoid Arthritis
28	Female	34.2619	26.625	35.0045	31.3599		Positive	Positive	Positive	Negative	Positive		36.5729	Rheumatoid Arthritis
31	Male	34.2003	15.6277	23.2259		Negative	Positive	Negative	Positive		Positive	163.376	38.5482	Rheumatoid Arthritis
65	Male	36.7355	12.6639	39.0295	34.0697		Negative		Negative		Negative	196.348	71.4637	Rheumatoid Arthritis
50	Female		21.9918	38.0728		Negative	Positive		Negative	Negative	Negative	95.3589		Rheumatoid Arthritis
29	Female	34.9215		29.3069	23.7346	Negative		Positive				192.532	59.9483	Rheumatoid Arthritis
21	Female	35.6539		38.8674	30.0316	Negative					Positive	152.328	28.7687	Rheumatoid Arthritis
64	Male		27.0022	22.0274	23.662	Negative	Positive	Negative	Positive	Positive		125.24	53.4701	Rheumatoid Arthritis
22	Female	39.3812	11.3498	31.1509	34.8403			Positive	Positive		Positive	143.651	26.2831	Rheumatoid Arthritis
21	Female	35.6311	15.4384	32.1611	23.497	Negative			Negative		Positive	102.482	27.5901	Rheumatoid Arthritis
48	Male	29.0285		23.9498		Positive			Positive	Positive	Negative	131.226	48.8039	Rheumatoid Arthritis
53	Male	44.0199	28.1844	29.3739		Positive	Negative		Positive		Positive		51.4796	Rheumatoid Arthritis
23	Male		24.5894	24.5979			Positive			Negative	Negative		65.3149	Rheumatoid Arthritis
53	Female	31.7533	25.9227	34.456	32.3952	Positive	Negative	Positive	Positive	Negative	Positive		23.5205	Rheumatoid Arthritis
54	Male	32.673			25.6305	Positive		Negative	Negative			129.538	26.9649	Rheumatoid Arthritis
78	Male	41.3606	12.5078	31.2262	27.5661			Negative			Positive	152.97		Rheumatoid Arthritis
33	Male		12.0416	31.2823	32.4846	Positive	Positive		Negative	Negative	Positive	127.884	27.1589	Rheumatoid Arthritis
47	Female	48.0826	11.3204	32.6828	32.1104	Negative	Positive	Negative	Negative		Negative	186.588		Rheumatoid Arthritis
61	Female	41.0958	21.4326	21.3425	26.3629	Negative	Negative	Positive				143.502	46.8746	Rheumatoid Arthritis
48	Female	33.5605	13.375		28.9127	Positive	Positive	Positive	Positive	Negative	Negative	150.792	59.4975	Rheumatoid Arthritis
34	Female	42.8182	11.8315	25.721	36.3951	Negative	Positive		Negative	Positive	Negative	140.444		Rheumatoid Arthritis
66	Male	33.9657	24.9792	22.7891	29.5921	Positive		Positive			Positive	131.066	53.2143	Rheumatoid Arthritis
42	Male	29.3064	28.2897	33.2606	33.3913	Positive			Positive			187.217	43.9092	Rheumatoid Arthritis
30	Male	31.7403	23.8717	37.881		Negative	Negative		Positive		Positive	104.547	41.0373	Rheumatoid Arthritis
45	Male	35.6271		24.1375	35.2057	Negative	Negative	Positive		Positive	Negative	146.753		Rheumatoid Arthritis
24	Male	30.7868	25.9303	38.1307	30.5364	Negative	Positive	Positive	Positive			111.423	42.0236	Rheumatoid Arthritis
42	Male	34.2741	13.7574	23.933	23.618	Positive	Negative	Negative	Negative	Positive	Negative	126.011	56.5639	Rheumatoid Arthritis
62	Male		13.6711	27.4894	30.6073	Negative			Positive	Positive	Positive	160.349	38.5443	Rheumatoid Arthritis
62	Male	29.1461	22.0516	31.997	33.6586		Positive	Positive	Negative	Negative			15.509	Rheumatoid Arthritis
36	Male	26.0885		30.8053	33.4989	Positive	Negative	Negative		Negative	Negative	198.038	45.5778	Rheumatoid Arthritis
45	Male	35.8668	22.3692	33.0832	26.1485	Positive	Negative	Positive		Negative	Negative	197.96	58.4556	Rheumatoid Arthritis
60	Female	28.6453		39.4856	36.2103		Positive	Negative	Negative		Positive	100.529		Rheumatoid Arthritis
50	Female	41.3184	13.2416	23.9869	38.5178	Negative	Negative	Negative		Negative		143.39	39.4038	Rheumatoid Arthritis
74	Male	28.2849	13.1361	25.0679	30.6385	Negative	Positive		Negative	Positive	Positive	88.9745	58.3881	Rheumatoid Arthritis
71	Male	34.0668		38.1851		Negative	Positive	Positive	Negative	Positive		120.162	67.9348	Rheumatoid Arthritis
50	Male	31.1643		21.7537			Positive	Negative	Negative	Positive		125.369	14.5325	Rheumatoid Arthritis
47	Female	40.0968	19.3273		25.3875			Negative	Negative	Positive		173.391	59.5933	Rheumatoid Arthritis
37	Male	36.9025	28.8862					Negative	Positive	Negative	Negative	149.059	57.267	Rheumatoid Arthritis
59	Male		12.7468	23.2821	30.0656	Positive	Negative	Positive	Positive		Positive	175.062	60.2886	Rheumatoid Arthritis
28	Male		24.5759	24.7929	23.8066	Positive	Positive	Negative	Positive	Negative		164.489	48.309	Rheumatoid Arthritis
41	Male	26.3075		21.9734	23.4637	Positive	Negative	Negative	Negative		Positive	133.974	36.0725	Rheumatoid Arthritis
73	Female	39.7856	27.2948	23.4373		Positive	Negative	Negative	Negative			157.998	33.4974	Rheumatoid Arthritis
75	Female	32.6177	13.0226	23.1757		Negative			Positive		Negative	153.924	46.2395	Rheumatoid Arthritis
48	Male	27.4729	16.116		32.8295	Positive	Negative	Negative	Positive		Positive	104.415	49.971	Rheumatoid Arthritis
38	Male	29.0329	26.3142	30.4439		Negative			Positive		Positive	97.4319		Rheumatoid Arthritis
20	Female	34.5331		33.2253	35.4913	Negative	Negative	Positive	Negative	Negative	Positive	153.074	15.4951	Rheumatoid Arthritis
71	Female	27.2204	22.6439	32.8481		Positive	Positive	Negative	Negative	Positive	Negative	188.814	15.453	Rheumatoid Arthritis
57	Female	30.2943		28.0085	28.9662	Positive	Positive		Positive	Positive	Negative	204.953	35.1597	Rheumatoid Arthritis
67	Male		11.2956	39.0716		Negative			Negative	Positive	Positive	97.9225	40.9578	Rheumatoid Arthritis
56	Female	31.9326		24.6746	36.4403	Negative			Negative	Negative	Negative	148.474	21.2786	Rheumatoid Arthritis
78	Male	33.3168	23.4112	31.3875	29.9269		Negative	Negative	Negative	Positive		170.999	27.8683	Rheumatoid Arthritis
76	Female	37.3832	17.7756	29.1433	34.5506	Negative	Positive	Positive	Positive	Negative		162.706	57.9266	Rheumatoid Arthritis
37	Female	35.3679	29.9402	37.9174	21.9188	Positive		Negative			Negative	200.296	17.4173	Rheumatoid Arthritis
65	Male	29.5018	11.4941	29.1295		Negative	Positive	Positive	Negative	Negative		200.762	64.7982	Rheumatoid Arthritis
21	Female	39.4042		23.5224	34.7537	Positive	Negative		Positive	Negative	Negative	125.218	61.3712	Rheumatoid Arthritis
70	Male	38.826	25.7124	30.845	36.6733		Positive		Positive	Negative	Negative	105.732	74.9137	Rheumatoid Arthritis
41	Female	27.2879	26.1684		38.0744	Negative	Negative	Positive	Positive	Positive	Positive	189.446		Rheumatoid Arthritis
74	Male		24.4852	28.2708	25.1617	Negative	Positive	Negative	Negative		Negative	152.994	70.327	Rheumatoid Arthritis
40	Male	31.9272	14.2566	23.7398	32.9874	Negative	Positive	Negative	Negative		Positive	153.386	41.2634	Rheumatoid Arthritis
65	Female	33.0693		37.0739		Negative	Negative	Positive					22.923	Rheumatoid Arthritis
70	Male	47.8942	23.2322	25.1934	39.319		Negative	Negative	Positive	Negative		159.834	35.1189	Rheumatoid Arthritis
49	Male	39.2335	12.175	39.6427	28.6046	Positive	Positive	Positive		Negative		149.918	70.8807	Rheumatoid Arthritis
48	Male	42.2546	13.9685		29.5437		Positive	Positive	Positive				47.7035	Rheumatoid Arthritis
24	Female	41.9644	19.4612	37.9726	24.5298			Positive	Negative	Negative		169.906	33.1645	Rheumatoid Arthritis
40	Female	47.0391	16.0405	36.6731		Negative	Positive	Positive	Positive		Negative	90.7496	41.9284	Rheumatoid Arthritis
58	Female	34.5818	27.5529	24.1126		Positive	Negative	Positive				121.762		Rheumatoid Arthritis
80	Female	27.0819	29.808	26.4319	39.6443	Positive	Negative	Positive		Positive		140.741	12.0477	Rheumatoid Arthritis
30	Female		27.667	33.391	38.789	Positive		Positive			Negative	177.579	47.1602	Rheumatoid Arthritis
28	Female	30.1332	19.8845			Negative	Positive		Negative		Negative	100.653	52.6472	Rheumatoid Arthritis
61	Male	38.1728	26.5927	38.809	24.4845	Positive	Positive		Positive	Positive	Positive	145.46	70.4824	Rheumatoid Arthritis
50	Male	36.0013	27.8665	37.8739	24.7363	Negative		Negative	Positive	Positive	Positive	193.877		Rheumatoid Arthritis
51	Male	38.3467	29.5358	36.0702	30.0536	Negative		Negative	Negative		Negative	126.007	31.2651	Rheumatoid Arthritis
74	Male	35.3455	21.4765	27.0923	21.4445	Positive	Positive	Negative	Positive		Negative	155.898	69.5451	Rheumatoid Arthritis
62	Female	39.6123	28.8098	25.6837		Positive	Negative		Negative	Positive	Positive	190.71	13.031	Rheumatoid Arthritis
52	Female		21.8074	38.5327	22.4798	Negative	Positive	Positive		Positive		158.07	18.0269	Rheumatoid Arthritis
79	Female	38.4703	13.3482	26.9427	23.846	Negative	Positive	Positive	Negative		Negative	150.757	43.7746	Rheumatoid Arthritis
21	Female	33.0623	22.0032	28.4118	38.4774		Negative	Positive		Negative				Rheumatoid Arthritis
80	Male	37.4145	24.2728	27.2809	23.6114	Negative	Negative	Negative	Negative	Positive	Negative	96.6515	61.9503	Rheumatoid Arthritis
54	Female			39.9878	29.9298	Positive	Negative	Positive			Positive	135.267	50.165	Rheumatoid Arthritis
22	Male	36.484	27.701	32.0295	31.5935	Positive	Negative	Negative	Negative	Negative	Positive		57.6216	Rheumatoid Arthritis
77	Male	30.3067	27.373	38.4467		Negative	Negative	Positive	Positive	Negative	Negative	136.568	43.8085	Rheumatoid Arthritis
21	Female	34.969	25.2908	22.2565	38.6606	Positive		Positive	Positive		Negative		47.7404	Rheumatoid Arthritis
59	Female	43.1498	21.9592	22.5402	27.5238	Negative	Negative	Negative	Positive				66.2364	Rheumatoid Arthritis
78	Female	32.6645	25.6343	30.7725	27.6171			Negative	Negative	Positive	Positive	186.41	53.7198	Rheumatoid Arthritis
42	Female	33.1258	11.5337			Positive	Positive	Positive	Negative		Negative	151.285	58.3237	Rheumatoid Arthritis
40	Male	40.6097			21.6172	Negative	Positive	Negative	Negative					Rheumatoid Arthritis
64	Male	30.6144	22.9624	37.594	24.203	Negative	Positive	Positive	Negative	Negative		145.867		Rheumatoid Arthritis
72	Male	44.0648	12.1114		22.6294	Positive	Negative			Negative	Negative	102.566		Rheumatoid Arthritis
38	Female	37.7838		24.7051	34.8274	Negative				Positive		148.997	63.5049	Rheumatoid Arthritis
62	Female	36.0473	15.9879	22.7027	37.0263		Positive	Negative				151.091	56.55	Rheumatoid Arthritis
30	Female	43.6101	24.9797	34.0785	25.9932	Positive		Positive	Positive	Positive		173.732	27.1719	Rheumatoid Arthritis
58	Female	33.7464		31.0996		Negative		Negative	Negative		Positive	136.092	33.287	Rheumatoid Arthritis
50	Male	37.2757	18.9658	37.6357	27.4499	Positive	Negative	Positive		Negative	Positive			Rheumatoid Arthritis
46	Male	34.8649	13.1454	22.3314	24.7088	Positive	Negative	Negative	Negative			135.259	62.9546	Rheumatoid Arthritis
23	Female	40.2613	16.2388	28.9049		Positive				Negative	Positive			Rheumatoid Arthritis
48	Male	46.3616	28.3739	37.9536	34.4079		Negative	Positive		Negative	Positive	157.47	72.4875	Rheumatoid Arthritis
35	Female	47.743	15.3488	28.9856		Negative	Negative		Positive	Positive	Positive	164.165	30.9692	Rheumatoid Arthritis
28	Female	26.953	15.2206	24.3954	34.1555	Negative		Positive	Negative		Positive	142.977		Rheumatoid Arthritis
61	Male		17.7254	22.6059	30.5236	Positive		Positive	Negative	Negative	Negative	101.335	25.0366	Rheumatoid Arthritis
24	Male		28.3398	34.9845	37.6626	Positive	Positive	Positive	Negative	Negative		148.059	41.6331	Rheumatoid Arthritis
52	Female	27.7608	24.3452	30.73	29.8379	Negative	Negative	Positive	Positive		Negative	160.595	57.4189	Rheumatoid Arthritis
62	Female	34.784	26.6173	28.6557	34.1016	Negative		Positive	Positive	Negative	Positive	118.817	27.4284	Rheumatoid Arthritis
54	Male	29.369	22.6116		30.2183	Positive	Negative	Negative		Positive	Negative	125.715	23.7989	Rheumatoid Arthritis
73	Female	31.2911	21.0805	23.7509	23.772	Negative		Positive	Positive		Positive	95.92	27.7955	Rheumatoid Arthritis
49	Female	37.8384	28.555	25.3464		Positive	Negative		Negative	Negative	Negative	140.332	38.0736	Rheumatoid Arthritis
37	Male	28.1564		31.8924	30.5477		Positive	Negative	Negative			100.027	70.1328	Rheumatoid Arthritis
56	Female	26.7657	26.724	30.4527		Positive		Positive	Positive	Negative		162.487		Rheumatoid Arthritis
30	Female	39.0674			22.0693		Positive	Negative	Positive	Negative	Positive	168.756	25.7939	Rheumatoid Arthritis
24	Male	38.7348	18.3553	35.5076	31.8954		Negative	Negative		Negative		155.499	22.4537	Rheumatoid Arthritis
39	Female	27.2374	12.0113	28.4002	29.9745	Positive	Negative	Negative		Negative		185.697	30.2292	Rheumatoid Arthritis
76	Male	36.9135	25.079	26.8682	21.2689	Negative	Positive	Negative	Positive		Positive	146.764	39.6205	Rheumatoid Arthritis
41	Female	29.4053	27.4572	34.9287		Negative	Negative	Positive	Negative		Negative	112.691		Rheumatoid Arthritis
26	Female	28.1679	18.3433	26.2019	31.0843	Positive	Negative	Negative	Positive	Positive	Negative	123.367	31.0024	Rheumatoid Arthritis
47	Male	44.1613		35.0805	27.7226		Positive	Negative	Negative	Positive		103.58	24.9908	Rheumatoid Arthritis
55	Female	34.403		34.8116	39.8378	Negative	Negative	Negative	Negative	Positive		166.184		Rheumatoid Arthritis
31	Male	35.9787	28.1894	39.2212	25.0961	Negative	Negative	Positive	Negative	Negative		94.266	38.3688	Rheumatoid Arthritis
36	Male	29.9055	19.852	36.0574	27.7068	Negative	Positive	Positive		Negative	Negative		19.6764	Rheumatoid Arthritis
38	Female	26.6382	23.5247	30.0627	32.882	Negative		Negative	Positive	Negative			29.1233	Rheumatoid Arthritis
46	Male	26.2487	26.2114	35.162	39.6676	Negative	Positive	Positive	Positive	Negative	Positive	150.875	64.1018	Rheumatoid Arthritis
38	Male	31.4557	14.8601	37.875		Positive			Positive	Positive	Positive	153.445	60.3029	Rheumatoid Arthritis
47	Male							Negative	Positive	Negative		186.292	35.4989	Rheumatoid Arthritis
58	Female	34.8439		29.605		Negative	Negative		Negative	Negative	Positive		51.8365	Rheumatoid Arthritis
79	Male	38.5705	25.9992	35.6055	25.0409	Negative	Negative	Positive			Positive	138.569	17.7774	Rheumatoid Arthritis
39	Male	27.3122	13.8453	25.7966		Positive	Positive	Negative	Negative	Positive	Positive	119.457	59.3591	Rheumatoid Arthritis
20	Male	33.7652	17.2094	24.29		Negative	Positive		Positive	Negative		151.604	48.86	Rheumatoid Arthritis
54	Male	33.6021		39.8883		Positive	Positive	Positive					49.7662	Rheumatoid Arthritis
29	Female	28.297	28.5469	29.582	35.1244	Negative	Negative	Positive		Negative		137.243	57.5319	Rheumatoid Arthritis
31	Male	30.6565		25.3722	28.4569	Negative	Positive	Negative	Positive			99.4873	58.5603	Rheumatoid Arthritis
63	Female		20.0633		25.9442	Negative			Positive	Positive	Negative	148.657		Rheumatoid Arthritis
37	Male	29.9201	20.3849	26.4379		Negative		Positive			Positive	190.836	59.3958	Rheumatoid Arthritis
44	Male	27.2485	22.9034	32.7304	21.522		Positive	Positive	Negative	Negative		120.039		Rheumatoid Arthritis
22	Female	36.76	11.936	22.6465		Negative			Positive		Negative	112.421	34.0393	Rheumatoid Arthritis
62	Male	31.4535		23.0097			Negative	Negative	Negative	Negative		205.595		Rheumatoid Arthritis
35	Male	39.6815		22.7078		Negative	Positive	Negative	Negative	Positive	Negative	142.109	36.9932	Rheumatoid Arthritis
69	Male	38.9288	18.11	38.4757	22.5267	Positive	Positive	Negative	Positive		Negative	187.698		Rheumatoid Arthritis
77	Female		19.4617	32.5793	27.0594	Positive		Negative		Positive		116.005	47.6618	Rheumatoid Arthritis
39	Female	38.7358			38.467	Negative	Positive	Negative	Positive			171.935	15.339	Rheumatoid Arthritis
38	Female	39.9828	21.0767	35.5726	39.6545	Negative	Positive	Negative			Positive	158.783	46.6279	Rheumatoid Arthritis
78	Female	48.2262	20.6864	23.2559		Negative		Positive	Negative	Positive			19.8644	Rheumatoid Arthritis
79	Male	34.8869	28.2344	24.5926	34.2956		Positive	Negative	Positive	Negative	Negative		56.5328	Rheumatoid Arthritis
53	Female	43.9013		21.9795	26.3161	Negative	Negative	Positive			Negative			Rheumatoid Arthritis
80	Female	39.1428	19.1755	28.9737	30.3887	Positive	Negative	Negative	Positive		Positive	89.2626	22.434	Rheumatoid Arthritis
37	Female	33.3648	19.2172	27.6011	39.9395	Positive	Positive	Positive	Negative	Positive			33.7379	Rheumatoid Arthritis
53	Male	46.6086		30.0751	24.414	Negative		Negative	Negative	Positive	Negative	90.6878	71.6984	Rheumatoid Arthritis
71	Female	40.3965		25.8529	34.1781	Negative	Positive	Positive	Positive		Negative	104.101	55.0555	Rheumatoid Arthritis
34	Female	33.1968		23.5877	26.4931	Positive	Positive	Negative	Negative	Negative	Negative	169.143		Rheumatoid Arthritis
25	Male	29.0988	26.2891	27.7621	33.052	Positive	Positive	Negative	Negative	Positive	Negative	94.9441	44.2121	Rheumatoid Arthritis
60	Female	36.8634	24.6291	22.0912	25.3729	Positive	Positive	Positive	Negative		Negative			Rheumatoid Arthritis
28	Female	29.8405	13.9342	29.2154				Positive		Negative		139.006	55.6659	Rheumatoid Arthritis
36	Male	35.5402	20.2293	32.2576		Positive		Positive	Negative	Positive	Negative	166.909	17.9215	Rheumatoid Arthritis
53	Male			24.6634		Negative	Positive	Negative	Negative	Positive	Positive	172.799	26.0185	Rheumatoid Arthritis
34	Male	32.1037	11.7384	28.7315		Negative		Positive		Negative	Negative		30.7853	Rheumatoid Arthritis
56	Male	36.188	25.8781	31.8927	30.9925	Positive	Positive		Negative	Positive	Negative	197.671	36.5415	Rheumatoid Arthritis
52	Male	28.4328	19.4589	21.5704	22.4006	Positive		Positive	Negative		Negative	92.0672	29.6718	Rheumatoid Arthritis
33	Male	29.9297	20.1141	36.9888		Negative	Negative	Positive	Positive	Positive	Positive	164.155	14.5168	Rheumatoid Arthritis
45	Female	29.7243		36.5152	38.761	Positive	Negative	Negative	Positive	Positive		180.902	26.7959	Rheumatoid Arthritis
55	Male	29.2933	21.2543	21.8937	25.1854	Positive		Negative	Positive			175.007	15.906	Rheumatoid Arthritis
24	Male	35.4724	27.1954	29.5529	36.2767	Negative	Negative	Positive	Negative		Negative	195.491	26.3095	Rheumatoid Arthritis
37	Male	31.9952	18.9689	31.9494	31.9168	Negative	Negative	Negative	Negative	Positive		175.697	24.7841	Rheumatoid Arthritis
64	Female		17.5863	21.9155	26.0244	Negative	Negative	Positive	Positive	Negative		142.031	71.1825	Rheumatoid Arthritis
36	Male	33.3402	27.1712	34.9485	29.5175	Positive		Negative	Positive	Positive	Positive	108.987	57.8717	Rheumatoid Arthritis
37	Female	35.31	12.4605	25.7466		Negative			Positive		Negative	100.285	48.5051	Rheumatoid Arthritis
29	Male	28.2898	20.8727	32.3553		Negative	Negative			Negative		130.675	63.2051	Rheumatoid Arthritis
23	Female		14.0124	36.4084	28.7247	Negative	Negative	Negative	Positive	Negative		103.824		Rheumatoid Arthritis
30	Female	49.7759	20.8618	27.9353	33.4274	Negative	Negative	Negative			Negative	149.48	26.5666	Rheumatoid Arthritis
67	Male	49.5016	21.0214	22.2388	30.1357	Negative		Positive	Negative		Positive	98.8669	62.5852	Rheumatoid Arthritis
73	Male		14.5544	29.5965	21.8801	Negative		Positive	Negative		Positive	158.499	22.1923	Rheumatoid Arthritis
25	Male	31.2243	11.0974	32.9589		Negative	Negative	Positive		Negative	Negative	178.833	20.1826	Rheumatoid Arthritis
20	Female	34.8884		22.1859		Negative	Negative	Positive	Negative	Positive	Positive	131.94	22.9245	Rheumatoid Arthritis
79	Male	49.3168	19.2351	23.0552	30.4149			Negative	Positive	Negative	Positive	92.8233	37.0442	Rheumatoid Arthritis
78	Male	27.0259	15.3263	36.0651		Positive	Negative	Negative	Negative			99.7874	17.5011	Rheumatoid Arthritis
26	Female	35.9783		32.8723	39.3706	Positive	Negative	Negative	Negative	Negative			66.7154	Rheumatoid Arthritis
65	Male	32.934			38.5404	Positive		Negative	Positive			136.313		Rheumatoid Arthritis
61	Male	30.9598	14.5732			Negative		Positive				106.034	64.2437	Rheumatoid Arthritis
56	Female	28.3167	28.0594	27.6948	32.1984	Positive	Negative	Negative	Positive		Positive	108.128	41.2626	Rheumatoid Arthritis
58	Male	37.6886	25.5967	28.8383	39.8401		Negative	Negative		Negative		183.85	25.243	Rheumatoid Arthritis
56	Male	36.0037	20.0566	26.8319		Positive	Negative	Positive				140.832	73.0512	Rheumatoid Arthritis
62	Male	26.2553	22.0575	28.2042	34.4726	Positive		Positive		Negative	Positive	147.154	31.6396	Rheumatoid Arthritis
20	Female		28.7035	26.3017	27.0226	Negative	Negative					146.748	19.1719	Rheumatoid Arthritis
34	Female	43.9289	21.6134	34.6877	24.1958	Positive	Negative	Positive	Positive	Negative	Negative	142.65	17.8684	Rheumatoid Arthritis
63	Male	28.0706	13.4963		31.6457	Positive	Negative	Negative	Negative	Negative			46.9727	Rheumatoid Arthritis
23	Female	37.8428	19.2497	27.8733		Negative	Negative		Positive	Negative		94.0997	66.158	Rheumatoid Arthritis
34	Male	29.4911	14.4301		38.1177		Negative		Negative			120.709	13.9107	Rheumatoid Arthritis
68	Male	32.2969	19.2653	22.3727	23.6917		Positive	Negative	Negative		Negative	146.439	66.479	Rheumatoid Arthritis
72	Male	44.9704	23.1419		31.2644	Negative		Negative		Positive		159.001	43.4543	Rheumatoid Arthritis
78	Male	30.3733	29.0506	37.5278	33.7704	Positive	Negative	Negative			Negative	137.711		Rheumatoid Arthritis
31	Female	47.4994	17.649		38.0914	Positive	Positive			Negative		106.283	42.1557	Rheumatoid Arthritis
75	Male	36.0862	24.0718	25.3843	31.6014	Positive	Positive		Negative	Negative			13.4295	Rheumatoid Arthritis
38	Female	35.8989		23.6961		Negative	Positive	Positive	Positive	Negative		174.124	68.7629	Rheumatoid Arthritis
28	Male	45.2722	27.9337	31.9899				Positive		Positive		167.753	15.1625	Rheumatoid Arthritis
59	Male	43.3186		21.665	27.9243	Positive			Positive	Positive	Negative	119.762	28.1888	Rheumatoid Arthritis
47	Male	26.9367	21.3456	30.6862	22.8375		Positive	Negative		Negative	Negative	175.74	53.2791	Rheumatoid Arthritis
31	Male	28.0076	20.6678	25.6604	32.2758	Negative	Positive	Negative	Negative	Negative		98.7445	14.837	Rheumatoid Arthritis
41	Female	39.536	16.6354	38.1422	35.9803	Negative	Positive			Negative	Negative	148.797	26.7527	Rheumatoid Arthritis
53	Male	39.0964		33.4663	25.9963	Positive		Positive	Positive	Negative	Negative	108.439	53.1938	Rheumatoid Arthritis
59	Male		18.4923		31.6891	Positive	Positive			Positive	Negative	172.258	74.4668	Rheumatoid Arthritis
46	Female	29.6532	15.0458	23.2918		Negative	Positive	Positive	Positive			139.428	56.0809	Rheumatoid Arthritis
23	Female	38.3887		39.4757	37.9698	Positive	Positive	Positive	Negative			94.8881	13.5945	Rheumatoid Arthritis
68	Female		20.4865	21.6448	35.5355	Positive	Positive	Negative	Positive	Positive	Negative	157.744	57.4752	Rheumatoid Arthritis
37	Male	30.3678	29.9368	38.3875	29.1443	Negative	Positive	Positive	Negative	Negative	Negative	126.578		Rheumatoid Arthritis
70	Female	38.1167	21.6233	22.7402	25.8784	Negative	Negative	Negative	Positive		Positive	187.319	65.3013	Rheumatoid Arthritis
33	Male	45.4333	24.9572	35.0739	32.3948	Negative	Positive	Negative	Negative		Positive	119.73		Rheumatoid Arthritis
77	Male	38.9941		31.0731	28.7082	Negative	Positive	Positive	Positive		Negative	120.223	37.2407	Rheumatoid Arthritis
22	Female	47.5738	19.9347	24.4152		Positive		Positive	Negative	Positive	Positive		44.0904	Rheumatoid Arthritis
75	Male	36.3851	13.3507	22.0489	33.8754	Negative	Positive	Positive	Positive	Negative	Negative		61.7422	Rheumatoid Arthritis
77	Male	29.409	26.5592	29.107		Positive	Positive	Positive			Negative	198.697	16.5201	Rheumatoid Arthritis
62	Male	29.4902	28.4273	30.4451	30.5257	Positive	Positive	Negative	Negative			143.663		Rheumatoid Arthritis
58	Female	44.8808		28.2416	23.6265	Positive	Negative	Negative	Positive	Positive	Positive		17.8227	Rheumatoid Arthritis
66	Female	28.7042	28.0131	22.5609	32.0695	Negative	Positive		Negative				63.9623	Rheumatoid Arthritis
21	Male	33.3571	23.6568	23.334		Negative	Negative	Negative	Negative	Positive	Positive	145.74		Rheumatoid Arthritis
75	Male	36.8365	16.0612	39.7711		Negative		Negative	Positive	Positive	Positive	108.768	34.6585	Rheumatoid Arthritis
30	Male	40.3022	13.4566	27.2292	23.3444	Positive	Negative		Positive	Positive	Negative	148.375	13.0831	Rheumatoid Arthritis
68	Female		28.0135	33.7363	39.3455	Positive		Positive	Negative	Negative		175.146	14.3595	Rheumatoid Arthritis
37	Female			38.2421		Positive				Positive	Positive	165.643	15.9614	Rheumatoid Arthritis
62	Female	32.8911	12.6524	38.337	24.8008	Negative	Positive	Negative			Positive	99.8258		Rheumatoid Arthritis
29	Male	33.6917	17.5622	21.1602	31.5296							128.331		Rheumatoid Arthritis
34	Male	33.2795	16.5281	33.9201	28.2513	Negative		Negative	Positive	Positive	Positive	164.523	44.7908	Rheumatoid Arthritis
21	Female	27.9679	13.5983	34.0818	30.7262	Negative	Negative	Negative	Positive		Negative	158.162		Rheumatoid Arthritis
62	Male	32.824	16.8333	32.3469	23.9209	Negative	Positive		Positive	Positive		191.672	49.0922	Rheumatoid Arthritis
70	Female	33.3464		34.2604		Positive	Positive	Positive	Negative			143.13	15.5856	Rheumatoid Arthritis
22	Female	29.8944	18.4851	38.6499	23.5261	Positive		Negative	Negative		Positive		38.998	Rheumatoid Arthritis
70	Male	37.3832		39.6115	38.0513	Negative	Negative		Positive			133.24	15.6518	Rheumatoid Arthritis
27	Female	30.7229		26.4776		Negative	Negative	Negative		Negative		157.988	28.0375	Rheumatoid Arthritis
60	Male		23.575	38.9236		Positive	Negative					178.48	34.0526	Rheumatoid Arthritis
26	Female	28.5506	27.5715	35.8507	37.7965	Negative	Positive	Negative			Positive	200.224	68.1414	Rheumatoid Arthritis
24	Male	31.7873			21.521								54.4918	Rheumatoid Arthritis
62	Female	38.0662	15.6622			Negative	Negative	Negative			Positive	94.5221	31.3161	Rheumatoid Arthritis
73	Female	36.3047	11.7947	37.0841		Negative	Positive	Positive	Negative			94.2101	20.8739	Rheumatoid Arthritis
43	Male	32.1121	18.3295	35.2665	36.5813		Negative	Positive		Positive	Positive	120.881	62.8218	Rheumatoid Arthritis
43	Male	28.8597	18.8515	30.3453	31.8992	Positive		Positive		Positive	Negative	170.356		Rheumatoid Arthritis
78	Male		25.7069	36.0497		Negative	Positive			Positive		137.128	54.9854	Rheumatoid Arthritis
64	Female	36.2452	28.9897								Negative	162.488	50.2028	Rheumatoid Arthritis
57	Male	27.8082	13.7588	27.9378	26.8219			Positive	Negative	Negative	Positive	111.844	43.983	Rheumatoid Arthritis
29	Male		28.7452	27.4521		Negative		Negative	Negative	Positive	Negative	98.6345	32.6271	Rheumatoid Arthritis
30	Male	26.3792	27.0608	28.3514	37.5138	Negative	Negative	Negative	Positive		Positive	137.123	53.8848	Rheumatoid Arthritis
80	Female		17.586	39.7823		Negative	Negative		Positive		Negative	139.665	68.7744	Rheumatoid Arthritis
24	Male	29.1372	13.8517	21.4889	33.644	Positive	Positive		Negative	Negative	Negative	197.513	41.0681	Rheumatoid Arthritis
62	Male	38.8026	22.3075	36.1418	21.838	Negative	Positive	Negative	Positive	Negative		120.078	37.0757	Rheumatoid Arthritis
75	Female	30.3767			26.3147	Positive	Negative	Negative		Positive		171.266	38.9596	Rheumatoid Arthritis
45	Female	43.2918	29.2324	38.6735	30.2463	Negative	Positive	Positive		Negative		112.288	24.2923	Rheumatoid Arthritis
31	Female	43.0855	18.6311	32.881		Negative	Negative	Negative	Positive			102.503	60.0394	Rheumatoid Arthritis
55	Male	26.2104	12.8312		37.9921	Negative	Negative	Negative	Negative	Negative		133.147		Rheumatoid Arthritis
72	Female	29.7347	19.1252	27.6296	28.7748	Negative		Positive	Positive	Positive	Positive	139.608	27.7734	Rheumatoid Arthritis
63	Female	49.7958	25.2953	32.5245		Positive	Negative	Negative		Negative		169.449	27.8477	Rheumatoid Arthritis
25	Female	46.0979	13.2878	21.4192	39.9504	Positive	Negative	Negative	Negative			103.318		Rheumatoid Arthritis
57	Male	28.2844	12.5279	33.1013	33.9895	Negative	Negative	Positive		Negative	Positive	95.9302	14.4536	Rheumatoid Arthritis
60	Female	36.8341	22.0044	34.3832		Positive	Negative	Negative	Negative	Negative	Positive	113.284	40.8773	Rheumatoid Arthritis
74	Male	27.0371	15.3165	25.1978		Positive	Negative	Negative		Negative		202.145	30.6704	Rheumatoid Arthritis
53	Female	28.7926	21.7261	32.4862	37.3723	Positive		Negative	Negative	Negative		141.425	66.119	Rheumatoid Arthritis
46	Female	26.687	11.1397	29.0376	21.1543	Positive	Positive	Positive	Positive	Positive		95.1072	66.5773	Rheumatoid Arthritis
50	Male	26.8248	12.8243	27.074		Negative	Negative	Negative	Positive	Negative		156.57	62.2088	Rheumatoid Arthritis
56	Female	36.8278	17.3267		26.943	Negative	Positive	Negative			Negative	163.655	59.7567	Rheumatoid Arthritis
74	Female	37.8065	28.0228	32.0883	32.1671							143.775	57.2406	Rheumatoid Arthritis
66	Male	32.667		27.311	32.1666	Positive	Positive	Positive	Negative	Positive	Negative	154.611	62.6446	Rheumatoid Arthritis
54	Female	26.069	27.3612	34.9655	26.4922	Negative	Positive	Positive	Positive	Negative	Negative		56.727	Rheumatoid Arthritis
26	Female	37.5439	17.638	30.3272	38.1166	Positive	Positive	Negative				163.728	34.8261	Rheumatoid Arthritis
32	Female	39.8079	18.1919	22.7222		Negative	Negative	Positive		Negative	Positive	90.402		Rheumatoid Arthritis
22	Male	26.4642		34.3959	27.3772	Positive	Positive	Positive	Negative	Positive	Negative		74.1926	Rheumatoid Arthritis
38	Male	28.4907	29.1282		24.1484	Positive	Negative	Negative	Positive	Negative	Negative	127.98	43.2739	Rheumatoid Arthritis
78	Female	44.145				Negative			Positive			189.089	46.0745	Rheumatoid Arthritis
59	Female	48.2619		32.2716						Negative		151.507		Rheumatoid Arthritis
49	Female	34.1722			21.7352	Positive		Negative	Negative	Positive		134.015	54.6147	Rheumatoid Arthritis
64	Female	29.7975		28.6676			Negative		Negative			168.21	47.3674	Rheumatoid Arthritis
68	Male	38.8384	11.0826	24.0792		Negative		Negative	Negative		Positive	187.357	23.9676	Rheumatoid Arthritis
80	Male	47.1946	14.4539	32.8584	38.8865	Positive	Negative	Negative			Positive	129.014	55.9577	Rheumatoid Arthritis
47	Female	38.21	12.4769	31.902		Positive		Positive	Negative	Positive	Negative	95.4992	27.8219	Rheumatoid Arthritis
25	Male	39.0566	29.8605	31.1747		Negative		Positive	Positive	Negative	Negative	150.11	55.6703	Rheumatoid Arthritis
39	Female	27.102	24.2732			Positive	Negative	Negative			Positive	200.18	15.141	Rheumatoid Arthritis
53	Male	38.2779	17.6945	29.2919	35.2374	Negative	Positive		Positive				71.9074	Rheumatoid Arthritis
63	Female	27.664	22.3715	25.9074		Negative		Positive	Positive	Negative	Negative	164.449	24.923	Rheumatoid Arthritis
67	Male	49.4209	25.7463	36.139	24.3295	Negative	Negative	Positive	Positive	Positive		95.485	36.5308	Rheumatoid Arthritis
29	Male	28.6016		24.9779	26.1446	Negative	Negative	Positive		Negative	Negative	119.65	18.4926	Rheumatoid Arthritis
74	Female		19.6139		24.2891	Negative	Positive		Positive	Positive	Positive	151.492	16.0482	Rheumatoid Arthritis
49	Female	33.3877	26.5179	38.4648	35.0002	Positive	Negative	Negative		Negative	Positive		56.3007	Rheumatoid Arthritis
68	Female	30.4873	19.6212	33.1432	21.9657		Negative	Negative		Negative	Positive		63.4166	Rheumatoid Arthritis
70	Female	27.6405	15.0698	32.6065	35.7521	Positive	Positive		Positive	Positive	Positive	200.563	19.9755	Rheumatoid Arthritis
59	Male	37.4391		37.8679		Negative		Negative	Negative	Positive	Negative	92.4242	35.3954	Rheumatoid Arthritis
77	Male	39.4302	16.4075		34.353		Negative	Negative	Positive				67.7096	Rheumatoid Arthritis
34	Male		20.9193	24.4248	29.155		Negative	Negative	Positive		Negative	157.013	21.8307	Rheumatoid Arthritis
64	Male	42.2315	23.7316	22.2992	38.3759		Positive		Positive		Negative	156.264	26.1056	Rheumatoid Arthritis
55	Female	46.9928	16.8967	21.9791	23.3665	Positive	Negative	Negative		Negative		95.0059	42.8533	Rheumatoid Arthritis
77	Male	32.2701	28.0338	37.5402	22.2622			Positive	Negative	Negative	Positive	170.673		Rheumatoid Arthritis
35	Male	28.1259	15.0984	27.1289	34.1488	Negative	Positive	Positive	Negative		Positive	121.989	21.2735	Rheumatoid Arthritis
36	Male	27.7131	21.1589	23.7924	33.2607	Positive		Positive	Positive			204.288	24.5446	Rheumatoid Arthritis
34	Female	27.0353		25.8819	24.7545	Positive	Positive	Positive	Positive	Negative		90.4836	19.8745	Rheumatoid Arthritis
56	Female			38.3728	37.6322	Positive	Positive	Positive	Negative		Positive	136.521	24.2434	Rheumatoid Arthritis
48	Female	26.1514	18.0298	28.288	30.0012	Positive	Positive					154.85		Rheumatoid Arthritis
52	Male	33.9015	24.8195	30.2584	23.0279	Positive	Positive	Negative	Positive	Positive	Negative	118.478	31.6556	Rheumatoid Arthritis
53	Male	36.4404	19.1051	22.016	39.0891	Positive	Positive	Positive		Positive	Positive	154.537		Rheumatoid Arthritis
26	Female	30.8667	22.1719	31.1753	26.1007	Positive	Positive	Positive	Negative			91.6611		Rheumatoid Arthritis
24	Male	47.8288	19.4529	25.5137	24.7277	Positive	Positive	Negative	Positive	Negative	Positive	110.075	45.831	Rheumatoid Arthritis
42	Female	34.4387	28.1903		35.4141	Negative	Negative	Positive		Negative	Positive		54.0949	Rheumatoid Arthritis
28	Female	39.9166	29.1369	32.3045	38.906	Negative			Positive		Positive	142.166	23.1777	Rheumatoid Arthritis
32	Male	34.7345			37.6368	Positive	Negative	Positive	Positive			178.567	28.3951	Rheumatoid Arthritis
54	Male	26.9796	15.4148	36.7206		Positive	Positive	Positive			Positive	135.736	69.4476	Rheumatoid Arthritis
38	Female	35.6781	18.5532	39.611	34.3222	Positive	Positive	Positive	Negative	Positive	Positive	164.437	46.034	Rheumatoid Arthritis
37	Male	36.6488	28.886	22.6704	23.5696	Negative	Positive			Negative		160.579	43.6282	Rheumatoid Arthritis
35	Female	33.2651	11.7831	34.2596		Positive	Negative		Positive		Positive		71.577	Rheumatoid Arthritis
29	Female	32.7107	15.797	37.6898	36.7486	Positive	Negative	Negative	Positive	Positive	Positive	167.346		Rheumatoid Arthritis
80	Female	30.9038		33.239	33.1665	Negative		Positive	Negative	Positive		173.754	61.3967	Rheumatoid Arthritis
57	Female	28.0861		25.8849		Positive	Negative	Negative			Negative	150.755	33.363	Rheumatoid Arthritis
65	Female	26.1257	29.1805	27.6352	25.3976	Positive		Positive	Negative	Negative		156.674	37.6262	Rheumatoid Arthritis
57	Male	26.0103	11.3606	24.4144	22.2114	Positive		Negative	Negative	Positive	Negative	148.781		Rheumatoid Arthritis
57	Male	30.2706	24.5658	32.3399	35.6299		Positive	Negative		Negative		167.712	30.1399	Rheumatoid Arthritis
61	Female	35.2255	15.3066	23.3915		Positive		Negative	Positive		Positive	123.817		Rheumatoid Arthritis
28	Female		22.2316	29.7586	33.6313		Positive	Negative	Positive	Negative	Negative	185.92		Rheumatoid Arthritis
42	Female	33.6073	28.2345	24.375				Negative				106.375	48.2037	Rheumatoid Arthritis
21	Male	39.5827	18.9602	22.0412		Negative	Positive	Negative	Positive			205.796		Rheumatoid Arthritis
75	Female	44.3416		39.295	27.0005	Negative	Positive	Negative	Negative		Negative		49.9434	Rheumatoid Arthritis
31	Male	27.3612		38.4511	28.1596	Positive	Negative	Positive	Positive	Positive		138.912	28.142	Rheumatoid Arthritis
58	Male	42.2502	19.7722	31.6403		Positive	Negative	Negative	Negative	Negative	Negative	118.753	30.1566	Rheumatoid Arthritis
21	Male	27.0994		28.9094	25.3935	Negative	Negative	Negative	Negative	Positive	Positive	144.451	35.6022	Rheumatoid Arthritis
48	Male	48.3341	26.369	36.9788	26.3705			Positive	Positive	Negative	Negative	180.161	25.8457	Rheumatoid Arthritis
52	Female	37.5736	18.7263	38.021		Positive	Negative	Negative	Negative			143.07	30.4896	Rheumatoid Arthritis
47	Male	29.8229	20.7634	35.4483	25.0427	Negative		Positive	Positive		Negative	112.198	65.0659	Rheumatoid Arthritis
57	Male	31.0646	24.9686	34.92	37.0168	Positive	Positive	Negative	Negative	Positive		155.016	49.4699	Rheumatoid Arthritis
49	Male			31.9904				Positive		Negative		130.65	42.7339	Rheumatoid Arthritis
29	Female		26.2603		29.9527	Positive			Positive	Negative		132.067	47.9161	Rheumatoid Arthritis
32	Female		13.6307	34.0317		Positive	Negative	Positive	Negative	Negative		132.891	20.4588	Rheumatoid Arthritis
78	Male	44.5318	13.9294	23.5273	35.5082	Positive	Positive	Negative		Negative	Positive	128.625	41.6374	Rheumatoid Arthritis
59	Female	32.8956	11.7791		24.1714	Positive		Negative	Negative	Positive	Positive	174.73	57.7965	Rheumatoid Arthritis
69	Female	34.0709	28.0815	33.3864				Positive	Negative		Positive			Rheumatoid Arthritis
51	Male	26.7093		35.1349	36.039	Positive	Positive		Positive			155.654	35.7459	Rheumatoid Arthritis
36	Male	42.913	19.168	23.3707		Negative	Negative		Negative			157.407	14.4073	Rheumatoid Arthritis
72	Male		23.1598	36.7622	39.2974	Negative	Positive	Positive	Positive	Positive	Negative	140.921	35.9218	Rheumatoid Arthritis
31	Female	46.3112		27.3845	32.017	Negative	Negative					114.188		Rheumatoid Arthritis
41	Female	47.7762	29.1763	28.3696		Negative	Negative		Negative	Negative		204.947	64.0755	Rheumatoid Arthritis
30	Male	38.7824	17.1828	22.9533	26.1067	Negative	Positive		Positive	Positive		163.288	66.3582	Rheumatoid Arthritis
69	Female	43.4274	27.8157	27.727	36.8024	Negative		Positive		Negative	Positive	162.432	49.1752	Rheumatoid Arthritis
56	Male	28.3743	28.2827	39.2269	22.4596	Positive	Negative	Positive	Positive		Positive		22.7799	Rheumatoid Arthritis
67	Male	29.0635		32.8263				Negative		Positive	Positive	131.7	14.605	Rheumatoid Arthritis
42	Female	28.8007	19.4185	29.5766		Positive		Positive	Negative	Negative		128.299	24.7593	Rheumatoid Arthritis
29	Female	32.2066	19.9015	39.7229	21.9211	Positive		Positive	Negative			91.2196		Rheumatoid Arthritis
45	Male		20.6794	27.2939	21.4714	Positive	Negative	Negative	Negative		Negative		24.7559	Rheumatoid Arthritis
64	Male	26.936		32.8081	31.86	Positive	Positive	Negative	Negative	Positive		198.318		Rheumatoid Arthritis
39	Female	32.7782	22.7514	35.3301	39.9424	Negative	Positive	Negative	Negative			190.051		Rheumatoid Arthritis
49	Male	30.1834	14.3968	38.1406		Positive	Negative		Negative		Positive		53.2315	Rheumatoid Arthritis
46	Female	38.7113		23.6222	26.528	Positive	Negative		Positive	Positive		104.182		Rheumatoid Arthritis
53	Female	39.4855	21.7908	39.898	35.0138	Positive	Positive	Negative	Positive		Negative	136.064		Rheumatoid Arthritis
58	Male	31.8002	18.664	21.2738	27.1957	Positive			Positive	Positive			41.8304	Rheumatoid Arthritis
76	Male	27.8032	23.2035				Positive	Positive	Positive		Positive	137.515	48.0408	Rheumatoid Arthritis
65	Male	30.3641	12.1347	26.8353	37.7993	Positive	Positive	Negative	Negative		Negative	173.617	43.7986	Rheumatoid Arthritis
21	Female	29.6956	12.6441	38.4894		Negative		Negative	Negative	Negative		152.719		Rheumatoid Arthritis
68	Female	39.0977	17.3438	31.2207	33.7687	Positive		Positive	Negative	Negative	Negative	112.818	70.2989	Rheumatoid Arthritis
46	Female	45.0769		21.0921		Negative	Negative	Negative	Positive	Positive	Negative	150.22	36.4828	Rheumatoid Arthritis
74	Male	38.1399	27.7328	22.9383	25.6811	Positive	Negative		Positive	Positive	Negative	149.929	55.573	Rheumatoid Arthritis
27	Male	37.3239	22.7279	33.1785	31.3819		Negative	Negative		Negative	Positive	158.932	59.9413	Rheumatoid Arthritis
75	Female	35.7488	21.05	30.382	23.9358	Negative			Negative		Negative	104.941	24.9424	Rheumatoid Arthritis
53	Female	27.8121	18.409	31.9653	39.8622	Negative	Negative	Positive	Negative	Negative		108.474		Rheumatoid Arthritis
26	Male	28.8824		29.0851	37.6415	Negative				Negative		101.325	26.1072	Rheumatoid Arthritis
21	Male	49.6593		38.9806	30.7967	Positive	Positive	Negative	Positive	Positive	Negative	129.964	63.0589	Rheumatoid Arthritis
78	Female	41.1918		34.3263		Negative	Positive	Negative	Negative	Negative		154.006	23.6959	Rheumatoid Arthritis
45	Female		24.8795	26.9857	27.3139	Negative	Negative	Negative	Positive	Positive	Positive	97.962	61.6065	Rheumatoid Arthritis
33	Male	33.7941	19.6925	36.3887	35.3837	Negative	Positive	Negative	Positive		Negative	181.758		Rheumatoid Arthritis
73	Female	33.2287	11.0362	28.5532	27.7547	Negative	Positive	Negative	Negative	Negative	Negative	138.759	53.5503	Rheumatoid Arthritis
72	Female	27.9092	13.7319	24.4565	28.2132	Positive	Negative				Negative	103.742	71.7162	Rheumatoid Arthritis
32	Female		25.0057	21.3285	25.2713	Negative		Negative	Negative		Negative	133.918	49.5026	Rheumatoid Arthritis
74	Female		22.3461	32.3281	29.4267			Positive	Positive	Negative	Positive	145.002		Rheumatoid Arthritis
65	Female	39.3618	23.2515	33.8483		Negative		Positive	Positive			199.599	34.4727	Rheumatoid Arthritis
77	Female	26.1138	25.134	36.7737	38.5839	Positive			Negative		Positive	107.021	32.7207	Rheumatoid Arthritis
79	Male	36.9466		39.8315	27.1251	Positive	Positive		Positive	Positive	Negative	98.4365	70.6451	Rheumatoid Arthritis
48	Male	29.7979	17.5682	32.9757	36.2762	Negative			Positive			95.6543	64.0552	Rheumatoid Arthritis
64	Female	30.6312		37.0591	35.1407	Positive	Negative	Negative		Positive	Positive	170.697	59.5725	Rheumatoid Arthritis
67	Female	26.6949	23.5747	33.0593	37.8222	Positive	Positive	Negative	Positive	Negative		109.563		Rheumatoid Arthritis
45	Female	31.3065	25.3441	35.6903	21.5857	Negative		Negative				158.857	54.3918	Rheumatoid Arthritis
24	Female	35.6511	17.4261		30.9458	Positive	Negative	Positive	Negative	Positive	Negative	164.79	61.5054	Rheumatoid Arthritis
40	Female		12.7619	37.9879	29.4184	Negative		Positive	Positive	Negative		92.584	51.3993	Rheumatoid Arthritis
61	Female	34.4734	14.8999	29.054		Negative	Positive		Positive	Negative	Negative	177.295	34.208	Rheumatoid Arthritis
58	Male	34.1159			22.2044	Negative			Positive			196.828	71.4662	Rheumatoid Arthritis
68	Female	32.3566	14.0623	32.1561	24.7369			Negative			Positive	126.774	40.8616	Rheumatoid Arthritis
70	Female	31.2601	11.1852	32.3732	25.5462	Positive				Positive	Positive	123.645		Rheumatoid Arthritis
74	Female	27.9803	20.2914	31.3552		Positive	Negative			Positive	Negative	174.755	38.9375	Rheumatoid Arthritis
38	Male	32.9281	13.4371	30.6784	28.7513	Negative	Negative	Positive	Negative	Positive		183.513	23.0181	Rheumatoid Arthritis
78	Male	29.0145		32.7409	32.5842	Positive	Negative		Positive	Negative		112.708	13.5401	Rheumatoid Arthritis
22	Female	35.7101	11.8834			Negative			Positive		Positive		30.8963	Rheumatoid Arthritis
60	Male	41.7121		21.6151	38.3329	Positive	Negative	Negative	Negative	Positive	Positive	138.907	39.7468	Rheumatoid Arthritis
20	Female	36.2106	19.9802	36.5195	36.5423	Negative	Positive	Negative	Negative	Negative	Positive	198.502		Rheumatoid Arthritis
64	Female	27.2357	21.5791	25.6295	35.4152	Positive	Negative		Positive	Positive		202.099		Rheumatoid Arthritis
79	Female	46.4397	22.051	25.8296		Negative	Negative	Negative	Negative			122.302		Rheumatoid Arthritis
23	Male	31.374	27.3576	34.7466	24.2392	Negative	Negative	Positive	Negative	Negative		90.804	28.0717	Rheumatoid Arthritis
64	Male	34.6709	19.3791	27.3874	21.3335	Negative	Negative		Negative	Positive	Negative		59.4468	Rheumatoid Arthritis
20	Male	37.5655	18.0281		29.4542	Positive		Negative	Negative	Negative	Negative	132.568	66.3694	Rheumatoid Arthritis
48	Male	31.7736	14.021	32.5935		Positive	Negative	Positive	Negative	Negative	Positive	168.367	54.7061	Rheumatoid Arthritis
66	Male	35.6819	15.0079	37.3497	32.8515	Positive	Positive		Positive		Negative	113.471	66.3202	Rheumatoid Arthritis
59	Female	49.5569	27.7441	23.1998	30.2162	Positive	Positive		Positive	Negative	Positive		63.2532	Rheumatoid Arthritis
51	Male	33.1006	26.2855		30.4426	Positive	Positive	Negative	Positive	Negative	Negative	92.4493	66.206	Rheumatoid Arthritis
30	Female	29.076		24.7575	22.0083	Positive	Negative	Negative	Negative	Negative	Negative	138.458	12.1992	Rheumatoid Arthritis
40	Female		25.3381	32.9917	31.5249			Negative	Negative	Negative		158.045	42.8031	Rheumatoid Arthritis
29	Female	26.2201	27.6114	31.3018	27.5959	Positive	Positive	Negative				157.116	26.274	Rheumatoid Arthritis
57	Male	41.8323	14.7018	24.354	33.5435	Negative	Positive	Negative			Positive			Rheumatoid Arthritis
53	Male	33.751		26.3667	37.0709	Positive	Positive	Negative	Negative	Negative	Negative	131.271	33.092	Rheumatoid Arthritis
38	Male	34.3777	24.2572	34.2385	25.1282	Negative	Negative	Negative	Negative	Positive	Negative			Rheumatoid Arthritis
75	Female	26.6286		30.7655	38.7056	Negative		Negative	Positive	Positive	Positive	171.663	19.6295	Rheumatoid Arthritis
31	Male	33.7516	13.8154	22.6402	29.283	Positive			Positive	Positive		147.76	71.5437	Rheumatoid Arthritis
22	Female	30.6092	21.833		32.2639	Positive	Positive	Negative	Positive	Negative	Negative	178.453	17.9535	Rheumatoid Arthritis
25	Male	49.0839	25.2894	30.6007	32.3091	Negative	Negative	Positive	Positive	Negative		168.231	30.0864	Rheumatoid Arthritis
22	Male	30.4969		22.6075	21.6287	Negative	Positive		Positive		Positive	176.679	40.9527	Rheumatoid Arthritis
49	Female	45.8575	25.3599	24.7118	32.144	Positive	Negative		Positive		Negative	154.256	34.9636	Rheumatoid Arthritis
48	Female	29.2474	26.3339	35.5729	24.8549	Positive	Positive	Negative	Negative	Negative		189.685	38.2926	Rheumatoid Arthritis
59	Male	33.7864	12.2202	25.6032	26.2965	Positive		Negative		Positive	Positive	129.443	30.5041	Rheumatoid Arthritis
42	Male	44.4154	26.4766	34.0719	33.572	Negative	Negative	Positive	Positive			176.619	44.4188	Rheumatoid Arthritis
54	Female	36.3808	25.9563	23.0118	28.0974	Positive			Positive	Negative		176.648		Rheumatoid Arthritis
28	Male	31.7242	26.4914	27.74	33.3821		Positive		Positive	Positive		159.095	37.6522	Rheumatoid Arthritis
36	Male	35.1334	27.4565	22.0202	32.2083	Negative	Negative			Negative	Negative	140.089	32.7175	Rheumatoid Arthritis
67	Female	44.0767		27.6947	36.6596	Positive	Negative		Negative	Negative		130.736	18.8337	Rheumatoid Arthritis
59	Female	34.897	11.3165	38.1662	24.0708	Negative	Positive	Positive		Negative		195.291		Rheumatoid Arthritis
77	Female	38.8615	24.2534	28.2085	35.4117	Negative	Negative	Negative		Negative		157.378	38.0683	Rheumatoid Arthritis
32	Male	33.1217	18.282	37.1914	36.4664		Negative			Negative		147.481	36.3461	Rheumatoid Arthritis
39	Male		28.6002	34.2115	35.0562	Negative	Negative	Positive			Positive	128.543	47.2375	Rheumatoid Arthritis
57	Female	37.5019	28.0496	39.4849		Negative		Negative	Positive			101.642	23.9115	Rheumatoid Arthritis
55	Female	27.5387	24.9548		33.6509	Positive	Negative	Negative			Negative	176.028	66.0418	Rheumatoid Arthritis
74	Male	27.0483	21.2773	36.7315	38.6985			Positive	Positive		Positive	105.541	65.2709	Rheumatoid Arthritis
70	Male	29.4232	16.0662		24.2307	Negative	Positive	Negative	Positive		Positive	150.49	68.8134	Rheumatoid Arthritis
68	Female	41.8097	13.7604	23.5828	29.8123	Negative	Positive	Positive		Positive	Negative	134.453	52.8389	Rheumatoid Arthritis
64	Male	39.5058	25.1734	33.6217		Positive		Negative		Positive		134.283	40.0654	Rheumatoid Arthritis
35	Female	26.3276	29.5637	22.2208	37.5252	Negative	Negative	Negative	Positive	Positive	Negative	113.539		Rheumatoid Arthritis
40	Female	32.9326	27.9295	39.7355		Negative	Positive	Positive				135.805	56.4907	Rheumatoid Arthritis
57	Male	35.9879	17.0167	22.6645		Negative			Negative	Positive	Negative	104.673	64.6274	Rheumatoid Arthritis
22	Female	27.1675	23.3971	37.4851	24.6357	Negative	Positive	Negative	Negative		Negative	91.4244	67.9632	Rheumatoid Arthritis
63	Female	37.2381		21.3601		Positive	Positive		Positive	Positive		153.21	40.3213	Rheumatoid Arthritis
34	Female	40.4602		36.9735	37.3236	Negative	Negative	Positive			Negative	149.47		Rheumatoid Arthritis
56	Female		24.9049	23.3898	28.3875	Positive	Positive		Negative	Negative	Negative		69.2262	Rheumatoid Arthritis
69	Male	28.844	22.7544	39.0541	21.9156	Positive		Positive	Positive	Negative		139.809	68.3789	Rheumatoid Arthritis
44	Male	49.3123	18.9332	39.0835			Positive		Negative		Positive	98.3963	53.3834	Rheumatoid Arthritis
36	Female	39.2308	27.3967	34.7549		Positive		Negative	Positive		Negative	156.875	51.2398	Rheumatoid Arthritis
80	Male	31.3575		38.7368			Positive	Positive	Positive	Positive	Negative	96.8616	28.0105	Rheumatoid Arthritis
59	Male	30.6193		24.0883		Negative	Positive	Negative	Positive		Positive	97.909	15.389	Rheumatoid Arthritis
72	Male	33.6282		28.6347			Negative			Positive		155.544	22.8149	Rheumatoid Arthritis
50	Female	32.302		21.3734	31.142		Positive					133.532	57.7963	Rheumatoid Arthritis
23	Male	47.1234	20.3189	27.6795	24.3382	Positive	Negative	Positive		Positive	Negative	179.279		Rheumatoid Arthritis
50	Female	27.7217	26.6602	31.1029	32.1938		Positive		Positive	Negative		128.781	72.9162	Rheumatoid Arthritis
30	Male	30.5859	11.1962	22.5383		Negative	Positive		Positive		Positive	159.133	41.1931	Rheumatoid Arthritis
42	Male	32.3546	27.3206	28.9185	30.7375	Negative		Negative		Negative	Positive	140.164	41.5016	Rheumatoid Arthritis
72	Male	27.6316		26.6779	23.092			Negative	Negative			179.551	13.5772	Rheumatoid Arthritis
58	Male	39.8274		39.9794	34.3824	Positive	Positive	Negative	Negative	Negative	Negative	136.696	38.2389	Rheumatoid Arthritis
58	Female	26.0082	27.668	35.7054	23.3749	Positive	Negative	Negative	Negative			115.727	73.9802	Rheumatoid Arthritis
54	Male			29.8928	34.045	Positive	Negative	Positive	Positive		Negative	130.724	32.927	Rheumatoid Arthritis
40	Male	47.2155	28.8308	32.4262	33.994	Negative	Negative	Negative	Positive			90.1433	17.4014	Rheumatoid Arthritis
63	Female	47.7519	15.3931	38.0299	34.5034	Negative		Positive	Negative	Negative	Positive		62.5013	Rheumatoid Arthritis
68	Female	33.9535	20.8756	39.9065		Negative	Positive	Positive	Positive	Positive			14.9313	Rheumatoid Arthritis
21	Male	26.4916		32.0112	22.2177	Negative			Positive	Positive	Negative	154.932	25.7655	Rheumatoid Arthritis
21	Male	31.399	17.3805		38.4595	Positive	Positive	Positive	Positive			203.827	52.7658	Rheumatoid Arthritis
71	Female	34.2874	15.9376	31.6748	27.894	Negative	Positive	Positive		Positive	Negative	134.847		Rheumatoid Arthritis
57	Male	29.2674		35.6689	21.4739	Negative	Positive		Positive	Negative		140.497	15.2659	Rheumatoid Arthritis
68	Female	30.9058	23.8267		30.826	Negative	Negative	Negative	Negative			194.104	32.5606	Rheumatoid Arthritis
74	Female	36.5239	17.3489	30.9903	34.1301	Negative	Negative	Negative	Positive	Negative		177.125	14.3931	Rheumatoid Arthritis
74	Female		27.1651		32.9043	Positive	Negative		Negative	Positive		182.029	48.6376	Rheumatoid Arthritis
54	Female	33.1369	24.4104	39.0793		Positive	Positive		Negative	Negative	Positive		33.8685	Rheumatoid Arthritis
59	Male	39.7604	29.8611	36.2213	22.6991		Negative	Positive	Positive	Negative	Negative	182.294	27.4658	Rheumatoid Arthritis
75	Female	26.4826		23.6701	31.3842	Negative	Negative	Negative	Positive			169.724	67.6186	Rheumatoid Arthritis
66	Female	41.6812		27.5705	22.5201	Positive	Negative	Negative				106.592	64.2831	Rheumatoid Arthritis
78	Female	46.3412	12.6205	26.147		Negative	Negative	Negative	Negative	Positive		88.0788	66.8954	Rheumatoid Arthritis
54	Female	26.8181	14.7674	30.2114	29.2289	Negative	Positive	Positive	Positive	Negative	Negative	145.728	65.4208	Rheumatoid Arthritis
44	Female	45.5354	12.0925		23.4069		Negative	Positive	Negative		Negative	165.45		Rheumatoid Arthritis
46	Male		13.0866	37.56	35.8653	Positive			Negative	Negative	Negative	187.682		Rheumatoid Arthritis
77	Female	28.9532		39.4919	37.6196	Negative		Positive		Negative		171.285		Rheumatoid Arthritis
25	Female	39.7841	17.0525			Positive		Negative		Negative	Positive	133.199		Rheumatoid Arthritis
69	Female	32.4258	16.912			Positive		Positive	Negative	Positive	Positive	174.324	70.0596	Rheumatoid Arthritis
22	Male	32.3303	21.6333	34.7937	34.0649	Positive					Negative	197.409	66.2548	Rheumatoid Arthritis
67	Male		22.8575	35.5364	35.38	Positive	Positive					94.6067	34.2727	Rheumatoid Arthritis
30	Male	36.2572	12.3759	22.8544	31.25	Negative		Positive	Negative	Positive		166.129	71.486	Rheumatoid Arthritis
62	Female	41.7979	24.0181		30.3789	Positive				Positive		196.915	38.037	Rheumatoid Arthritis
56	Female	34.1551		38.1728		Negative		Positive	Positive	Positive	Positive	176.058	14.9113	Rheumatoid Arthritis
65	Female	32.748	14.041	24.2741		Negative	Positive		Negative	Negative	Positive	104.317	61.957	Rheumatoid Arthritis
43	Male	34.5423	20.9076	21.3402	24.9936	Negative		Negative	Positive				13.61	Rheumatoid Arthritis
62	Male	37.7586	17.6374	37.8652	23.3703									Rheumatoid Arthritis
50	Female	33.9692	20.2728		34.9465	Negative	Negative	Positive	Negative	Negative		138.348	31.4098	Rheumatoid Arthritis
79	Male	26.369	29.3427	38.2328	28.3776	Negative	Positive	Positive	Positive		Positive	138.42		Rheumatoid Arthritis
36	Female	44.5806		35.6569	31.9561	Negative		Positive	Positive	Negative	Positive	201.777	58.0788	Rheumatoid Arthritis
59	Female	43.3446	24.2412	27.4872		Positive			Positive	Negative		157.893	41.1963	Rheumatoid Arthritis
25	Male	43.3493		25.3141	23.7188	Negative		Negative		Negative	Negative	156.662	45.6571	Rheumatoid Arthritis
54	Female	29.3869	21.1869	26.0594	35.9034		Negative	Negative	Positive		Negative	97.1581	52.3232	Rheumatoid Arthritis
31	Male	35.0263	28.8466	23.6416	29.3227	Negative		Positive	Positive	Positive	Negative	203.442	57.1119	Rheumatoid Arthritis
78	Male	37.5518	16.1115	38.6325	29.3221	Negative			Negative	Negative	Positive	132.087	36.7442	Rheumatoid Arthritis
39	Male	26.0107	14.4699		36.13	Positive		Negative	Positive	Negative		193.534		Rheumatoid Arthritis
55	Male	43.4906	11.6212	26.0979	31.3846	Positive		Positive	Positive	Positive		123.517	33.5929	Rheumatoid Arthritis
23	Female		22.8101	33.7931	35.6033	Negative		Positive	Negative		Negative	120.302	40.5767	Rheumatoid Arthritis
54	Female	33.3141		22.6238	32.3107	Negative	Negative	Positive	Positive	Negative			59.2008	Rheumatoid Arthritis
39	Female	39.1801	28.1381	36.7592	37.3992	Negative	Positive	Negative		Positive		99.1584	20.3093	Rheumatoid Arthritis
80	Male	27.9552		37.6925	35.7681	Positive	Positive	Negative			Negative	134.28	18.9747	Rheumatoid Arthritis
58	Male	38.3606	22.9821	32.5817	25.1803		Positive	Negative				196.222	72.908	Rheumatoid Arthritis
21	Female	36.4027	23.6831		36.2088	Positive	Negative	Negative			Negative	123.689	20.1322	Rheumatoid Arthritis
24	Female	29.7234	11.7958	31.9598	23.5596		Negative		Positive			131.968	18.5042	Rheumatoid Arthritis
36	Female	30.6126	25.119	38.0146		Negative			Negative	Negative	Negative	126.058	69.3234	Rheumatoid Arthritis
32	Male	27.772	18.9657	23.7086	31.7199			Positive	Negative	Negative	Positive	98.9504	28.7949	Rheumatoid Arthritis
66	Male	29.871	25.3178	33.7842	24.3816	Negative	Negative		Positive	Negative		157.115		Rheumatoid Arthritis
26	Male	47.3772	11.803		29.6281	Positive	Positive	Positive	Positive	Positive	Negative	173.786	17.9962	Rheumatoid Arthritis
62	Female	32.1034	14.3811	31.615		Positive	Negative	Negative	Negative			193	69.66	Rheumatoid Arthritis
75	Male		28.8576	31.0815	27.6468	Negative	Negative	Positive	Positive	Negative	Positive	171.615	64.1189	Rheumatoid Arthritis
51	Male		24.6124	24.0997		Positive	Negative	Positive	Negative	Positive	Positive		25.6665	Rheumatoid Arthritis
29	Male	32.3258	23.9968			Negative		Negative		Positive	Negative	110.715	22.0226	Rheumatoid Arthritis
36	Male	33.8217	16.0083		32.5292	Positive		Negative	Negative	Positive	Negative	145.636	68.7921	Rheumatoid Arthritis
72	Male	27.1927	11.5448	23.6778	30.9916	Positive		Negative	Positive	Negative	Positive	141.403	71.021	Rheumatoid Arthritis
36	Female	32.7387	23.3266	25.0015	29.2798				Negative	Positive	Positive		38.113	Rheumatoid Arthritis
41	Male	32.0698	22.6607	33.3576	22.5144	Negative	Negative	Positive		Positive	Negative	177.568	60.2817	Rheumatoid Arthritis
24	Male		19.3669	29.6139	23.8515	Negative		Positive	Positive	Positive		172.599	15.7488	Rheumatoid Arthritis
67	Male	33.266	15.6185	32.9664		Positive	Negative	Negative			Positive	185.644	71.4495	Rheumatoid Arthritis
41	Female	35.4447	11.1509	27.8631	39.5218	Positive	Negative	Positive	Positive	Negative	Positive	137.367		Rheumatoid Arthritis
34	Female	38.2729	16.1115	31.9053	21.8113	Positive	Positive	Negative	Positive		Negative	96.8658	44.4353	Rheumatoid Arthritis
35	Male	45.415	11.2408	27.9503	32.0924	Positive	Negative	Negative	Negative	Negative	Positive	141.312	58.0787	Rheumatoid Arthritis
78	Male	38.1085	23.0187	28.1022				Positive	Negative	Positive	Negative	127.894	55.736	Rheumatoid Arthritis
39	Male	37.9855	16.3358	35.9503	29.0584		Positive		Positive	Positive		150.302	45.4607	Rheumatoid Arthritis
70	Female	29.432	26.1088	34.4269		Positive		Negative	Positive	Negative		119.696	63.2719	Rheumatoid Arthritis
49	Male	34.888		35.42	22.6428	Positive	Negative	Positive	Positive	Negative		165.415	45.9647	Rheumatoid Arthritis
41	Female	32.9692	16.4876	27.4821	22.4531	Negative	Negative	Positive	Positive		Positive	148.684		Rheumatoid Arthritis
49	Male	41.3033		27.2616	21.1269		Negative	Positive	Negative	Positive	Negative	173.107	55.7908	Rheumatoid Arthritis
26	Male		13.6467	31.339	22.2273	Positive	Negative	Negative	Negative	Negative		103.449	29.522	Rheumatoid Arthritis
45	Female	35.8196	27.2183		31.5454	Negative	Negative	Positive	Positive	Negative	Negative	103.981	47.4326	Rheumatoid Arthritis
34	Male	31.625	17.8182	32.7213	27.8266		Negative	Positive	Negative	Negative	Negative	113.686		Rheumatoid Arthritis
49	Female	41.95		28.5529	36.4868	Positive	Positive	Positive	Positive	Negative		147.404	20.0697	Rheumatoid Arthritis
75	Male			26.7863			Positive	Positive			Negative	117.545	16.0575	Rheumatoid Arthritis
69	Male	38.151	14.4486	26.0167	22.6728	Positive	Positive	Negative	Positive	Negative	Negative	94.5781		Rheumatoid Arthritis
70	Male	39.6493	15.9148	21.986	33.1582		Negative	Negative	Positive			109.812	57.8372	Rheumatoid Arthritis
39	Female		11.4064	29.0342	21.775	Negative		Negative	Negative		Negative	136.337	51.5831	Rheumatoid Arthritis
32	Male		17.0604	35.2385	38.3622		Positive		Positive	Negative	Positive	100.004	37.2119	Rheumatoid Arthritis
25	Male	45.0293	25.0807			Positive			Negative		Negative	118.667	41.9509	Rheumatoid Arthritis
68	Male		24.1112	21.9256	39.1421	Negative			Negative		Positive	195.216	53.5814	Rheumatoid Arthritis
21	Male	27.9495	19.0792	37.2899		Negative			Positive	Positive	Positive	121.64	39.2122	Rheumatoid Arthritis
65	Male	27.1225	28.3155	39.6941	35.9187	Positive	Positive	Negative	Positive	Positive		148.864	32.3428	Rheumatoid Arthritis
51	Female	36.4321	16.1626	24.1612	36.9709	Positive	Positive	Negative	Positive	Positive		160.537		Rheumatoid Arthritis
66	Male	39.0855	25.6027	24.4189	23.8286		Negative	Positive	Positive		Positive	104.033	66.5089	Rheumatoid Arthritis
57	Female	28.4824		39.6478	24.1821	Negative		Positive	Negative	Positive	Negative	162.923	38.41	Rheumatoid Arthritis
44	Female	27.4553	11.3735	22.5916	38.2364		Negative	Negative	Positive			176.564	56.818	Rheumatoid Arthritis
37	Male	42.4979		36.3877	21.1351	Negative	Positive				Positive	156.383	23.4614	Rheumatoid Arthritis
73	Male	34.8123	14.904	30.9973		Positive	Positive	Negative	Negative	Negative		182.997	61.1132	Rheumatoid Arthritis
58	Female	29.9204	26.8635		37.2453	Positive		Negative			Positive	112.519	62.2059	Rheumatoid Arthritis
28	Male	28.9854	25.9394	25.7863	32.4033	Negative	Positive	Negative	Negative			178.508	71.1165	Rheumatoid Arthritis
64	Female	29.9471	23.704	22.6595		Negative	Negative	Positive			Positive	170.978	44.906	Rheumatoid Arthritis
67	Male	32.7201		39.8332		Negative	Positive	Positive		Negative		100.458	44.9964	Rheumatoid Arthritis
32	Male	35.4726	24.7609	38.0084	32.1152	Negative		Negative	Negative			185.454	12.2264	Rheumatoid Arthritis
42	Female	35.3158	24.4494	37.4767	29.8532			Positive	Positive	Negative	Positive	107.682	71.1043	Rheumatoid Arthritis
65	Female	48.2213	16.1861	37.2713	27.7633	Positive	Negative	Positive	Negative				43.4466	Rheumatoid Arthritis
78	Male	31.5985		38.8868		Positive	Negative		Positive	Positive	Negative		15.7229	Rheumatoid Arthritis
33	Female	31.0397	12.3889		35.3856	Negative	Negative	Positive	Negative			105.754	44.9176	Rheumatoid Arthritis
42	Male	28.0694	27.9899	35.738	30.4964	Negative	Negative	Positive		Negative	Positive	172.167	53.218	Rheumatoid Arthritis
67	Female	37.4462		28.5644	36.2701		Negative		Negative	Positive	Negative	134.333	30.7088	Rheumatoid Arthritis
41	Male	34.4636	12.0717	36.5167		Positive	Negative	Positive	Negative		Negative	122.791	22.9578	Rheumatoid Arthritis
60	Female	31.231	11.3121	36.3157	39.6691	Positive	Negative		Positive		Positive		34.8691	Rheumatoid Arthritis
21	Female	39.6556	14.8859		38.875	Positive				Negative		103.166	58.1335	Rheumatoid Arthritis
79	Male	33.2878	27.8636	36.3029		Positive	Negative		Positive	Positive		153.177	57.7004	Rheumatoid Arthritis
65	Female	39.7791	18.1705	24.5147	39.743	Negative	Negative	Negative	Positive			99.8713	13.1797	Rheumatoid Arthritis
27	Female	28.7637	29.807	21.5121	28.7869		Negative	Negative	Positive	Negative	Positive	95.6101	14.1849	Rheumatoid Arthritis
22	Male	33.7168	28.6116	27.6576	23.101		Negative		Positive			90.7281		Rheumatoid Arthritis
69	Male	35.0945	11.418	36.2376	25.4702	Negative		Negative	Negative		Negative			Rheumatoid Arthritis
25	Female	34.9445	11.3177	39.699	36.4863	Negative	Negative	Positive	Positive		Positive	192.276	63.3665	Rheumatoid Arthritis
77	Female	35.4218	24.165	33.2391	28.3069	Positive		Negative	Positive	Positive		153.832		Rheumatoid Arthritis
25	Male		22.7675		31.151	Negative	Negative		Positive	Negative	Positive	118.528	70.2459	Rheumatoid Arthritis
46	Male	42.0565	25.4596		36.4129	Positive		Positive		Positive	Positive	92.8552	48.0787	Rheumatoid Arthritis
42	Male		14.6328			Positive	Negative	Positive	Positive			147.245		Rheumatoid Arthritis
26	Female	36.3				Negative		Positive		Positive	Negative	128.379	57.7877	Rheumatoid Arthritis
47	Male	36.5743	12.1344	34.6583	31.6846	Negative	Negative		Negative	Positive	Positive	178.41	60.7451	Rheumatoid Arthritis
77	Male	27.657	20.8242	23.3721			Positive			Negative		154.779	32.9387	Rheumatoid Arthritis
29	Female	28.5564	17.0275	32.1905	30.7661			Negative	Negative	Negative		151.613		Rheumatoid Arthritis
64	Male	49.6576	14.3229	36.0291		Negative	Negative			Negative	Positive	92.1587		Rheumatoid Arthritis
67	Female	43.2182	24.0514	22.343	22.6917	Positive	Positive	Negative	Negative	Positive		198.921	26.5099	Rheumatoid Arthritis
40	Male	31.1376	15.442	23.7639			Negative	Negative	Negative			195.031		Rheumatoid Arthritis
36	Male	36.0167	14.4882	23.5195		Negative	Positive	Negative			Negative	203.484	39.9637	Rheumatoid Arthritis
41	Female	28.7028			38.4251			Positive	Negative	Negative	Negative	117.063	16.3667	Rheumatoid Arthritis
80	Female	27.328	29.0777	32.8975	23.4825	Positive	Positive	Negative	Negative	Negative	Positive		60.8297	Rheumatoid Arthritis
46	Female	29.9782	11.0938	29.4037	22.2493	Positive	Negative	Positive	Positive	Negative	Positive	181.242	60.7547	Rheumatoid Arthritis
40	Female	35.7403	22.799	38.6351	26.6349				Negative		Positive	143.381	68.5974	Rheumatoid Arthritis
30	Female	39.8758	22.6706	24.2548	30.2163	Positive	Positive		Positive	Positive	Positive	127.401	30.265	Rheumatoid Arthritis
20	Male	35.9353	26.4921	34.4039	37.337		Positive	Negative	Negative	Negative		91.2579		Rheumatoid Arthritis
68	Female	46.5274	15.4094		31.0846	Positive	Negative	Positive	Negative	Positive		174.175	46.4223	Rheumatoid Arthritis
66	Male	33.8403	23.1941	35.5871	39.7243	Positive	Positive	Positive	Negative			171.979	65.1645	Rheumatoid Arthritis
37	Male	39.8051	11.3209	39.5547				Negative	Negative	Negative	Negative	177.504	29.6041	Rheumatoid Arthritis
27	Male	27.6804	20.4937	32.6081	24.6091	Negative		Negative	Positive			186.823	70.9307	Rheumatoid Arthritis
29	Female	33.6424	18.7499	37.548	39.5477	Negative	Positive	Positive				150.312	14.5698	Rheumatoid Arthritis
47	Male	40.5424	18.6948	34.1964		Positive	Positive	Positive	Positive			98.2916	29.0046	Rheumatoid Arthritis
59	Female	48.9018	29.8805		24.4493	Negative	Positive	Negative	Positive	Positive	Negative	118.265	70.1303	Rheumatoid Arthritis
80	Female	48.6053	16.3925	21.4302		Positive	Positive	Positive	Negative	Negative	Positive	140.981	18.0589	Rheumatoid Arthritis
46	Female	35.5786	23.1086	24.1586	32.1278	Positive	Positive		Positive	Negative			19.8208	Rheumatoid Arthritis
31	Female	26.7046	18.3929	27.6343		Positive	Negative	Negative	Negative			135.231	46.1716	Rheumatoid Arthritis
49	Female	26.9111	18.1783	31.9991	36.5528	Positive	Negative	Positive		Positive		184.964	18.9183	Rheumatoid Arthritis
56	Female	45.328	17.8142	30.2986		Negative	Positive			Negative			60.8356	Rheumatoid Arthritis
21	Female	37.1659	15.4236	37.4705	34.3854		Positive	Negative	Negative		Negative	200.873		Rheumatoid Arthritis
39	Male	34.7669		31.9079	23.3489	Negative	Negative	Positive	Negative		Positive	142.588	50.1556	Rheumatoid Arthritis
55	Male	35.3752	12.3044	28.4629	24.271	Positive		Negative	Positive	Positive		101.023	55.442	Rheumatoid Arthritis
41	Male		11.6698	39.2433		Negative	Positive	Negative	Positive	Positive		156.645	60.243	Rheumatoid Arthritis
59	Female	42.3867		31.6831	31.5569	Negative	Positive	Negative		Positive		158.439	46.23	Rheumatoid Arthritis
55	Male	32.0823	23.3812	27.4376	25.8172	Positive	Positive	Negative		Positive		149.554	33.2051	Rheumatoid Arthritis
58	Male	39.1423	21.1829	22.7146		Positive	Positive	Positive	Negative		Negative		13.8941	Rheumatoid Arthritis
51	Male	49.9454	19.3487	21.1245	34.7587	Positive	Negative	Positive	Positive	Positive	Negative	116.123	37.2087	Rheumatoid Arthritis
66	Male	31.1255	19.0092	21.2125	25.0294	Negative		Negative	Positive	Negative		204.305	51.1917	Rheumatoid Arthritis
79	Female	42.1739		31.6502	27.6846		Negative	Negative	Negative	Positive		130.847	66.3005	Rheumatoid Arthritis
64	Male	39.1143	21.9354	22.4374		Positive	Negative		Positive	Negative	Positive		28.8466	Rheumatoid Arthritis
51	Female	37.1397	25.0158	24.0161	35.985	Positive	Negative	Negative	Positive	Negative	Negative	175.522	39.3692	Rheumatoid Arthritis
25	Female	38.5206	13.0553	39.2709	39.8842		Positive		Positive	Negative	Positive		18.0033	Rheumatoid Arthritis
46	Male	47.3023	19.1692	32.3515	39.5473	Negative	Positive	Positive	Negative	Positive	Positive	139.954	52.5796	Rheumatoid Arthritis
71	Male	31.6129	12.9958			Positive		Negative	Positive			128.222	63.0199	Rheumatoid Arthritis
76	Female			37.9003	36.5737		Positive		Negative		Negative		39.4184	Rheumatoid Arthritis
60	Female	30.3731	25.9196	31.3145		Negative	Positive	Negative	Negative	Positive	Positive	150.408	33.732	Rheumatoid Arthritis
32	Male	32.4015				Positive	Positive	Positive			Positive	126.867	66.2149	Rheumatoid Arthritis
65	Male	26.3649	16.6948	29.6816	29.9875	Positive	Negative	Positive	Negative			191.849	46.0677	Rheumatoid Arthritis
25	Female	36.1079	20.5328	38.4672	38.3484	Negative	Negative		Positive		Negative	144.06	32.1614	Rheumatoid Arthritis
73	Male	26.5513	26.9408	32.4718	21.0595		Positive	Positive	Positive		Negative	201.107	23.9779	Rheumatoid Arthritis
29	Male	34.1983		31.8179	26.5662	Positive	Negative	Positive	Positive	Positive	Positive		26.03	Rheumatoid Arthritis
75	Male	34.8342	18.9283	31.8537	24.9666	Negative	Positive	Negative		Negative			57.4685	Rheumatoid Arthritis
64	Female	32.6544	28.4409	25.1076	23.3222	Negative	Negative	Positive	Negative		Positive	88.8177	40.5721	Rheumatoid Arthritis
73	Female		18.8005	25.4775	21.2673	Negative	Negative		Positive		Negative	96.3307	61.9299	Rheumatoid Arthritis
38	Female	27.5088	22.3509	24.1866		Positive		Negative	Positive		Negative	123.493	51.1715	Rheumatoid Arthritis
43	Female	33.9796		38.7345	29.4442	Positive	Positive	Positive	Positive	Positive	Negative	157.797	53.3787	Rheumatoid Arthritis
80	Male	37.7056				Negative	Negative	Negative		Positive	Negative		40.2291	Rheumatoid Arthritis
73	Female	33.7442	24.2795	37.9852	38.4146	Negative			Positive	Negative	Positive			Rheumatoid Arthritis
42	Male		16.1246	29.0541	32.959	Positive	Negative	Negative	Negative	Negative		149.96	15.1936	Rheumatoid Arthritis
32	Male	36.2283		24.8009	28.587	Positive		Negative	Negative	Negative	Negative	189.928	25.0847	Rheumatoid Arthritis
73	Female	41.2859	12.4555	26.5039	26.0037	Negative	Positive	Positive	Positive	Positive		137.757	18.6779	Rheumatoid Arthritis
33	Female	28.1073	11.5025	27.6124			Positive		Negative	Negative		187.37		Rheumatoid Arthritis
64	Female	44.7213	15.4695	38.9748	28.5429		Negative	Positive	Negative	Positive	Positive		52.8742	Rheumatoid Arthritis
56	Female		23.4876			Negative	Positive	Negative	Positive	Negative		138.122	44.7567	Rheumatoid Arthritis
34	Female	28.2313	14.2781	37.1369	33.6749	Negative	Negative	Positive			Positive	99.5689	53.8792	Rheumatoid Arthritis
29	Female	37.3357	28.8626	36.4538	24.2644	Negative	Positive	Positive	Negative		Positive		28.2373	Rheumatoid Arthritis
23	Female	34.22	25.897	36.9765	28.4481	Negative	Negative	Positive	Negative	Positive		99.9181	63.4613	Rheumatoid Arthritis
56	Female	32.3458	21.7611		25.5844	Negative	Negative	Positive	Positive	Positive		160.461	40.8815	Rheumatoid Arthritis
77	Female	33.6354	20.1361	37.8749	27.2906	Positive	Negative	Negative		Positive	Positive	184.181	43.4045	Rheumatoid Arthritis
66	Female	36.7215	21.2024	39.9225	37.7218	Negative		Negative		Negative		174.378	67.3081	Rheumatoid Arthritis
55	Male	34.9595	23.3502	34.6417		Negative	Positive	Positive	Positive		Negative	106.665	53.7253	Rheumatoid Arthritis
80	Female	33.7851	14.6292	32.6138	26.7418		Positive	Positive	Negative	Negative	Negative		31.6947	Rheumatoid Arthritis
33	Male	37.8515	26.9251	21.5061		Negative	Positive	Positive	Positive			123.774	68.4137	Rheumatoid Arthritis
46	Female	40.1829	14.0602	30.1543	26.9861	Negative	Positive	Positive		Positive	Negative	135.359	27.6843	Rheumatoid Arthritis
23	Male	33.947	15.1509		35.5244	Positive	Positive	Negative	Positive		Negative	146.069	59.4715	Rheumatoid Arthritis
54	Male	34.3896	28.1372	39.179		Negative	Positive	Positive		Positive	Positive	102.999	69.4228	Rheumatoid Arthritis
22	Female	40.4714	24.4863		28.3371	Negative	Negative	Positive	Positive	Negative	Negative		73.5075	Rheumatoid Arthritis
25	Male	37.7403	13.7464	36.4638			Negative	Positive	Negative	Positive	Negative		60.6991	Rheumatoid Arthritis
79	Female	30.2937	29.7618		22.4589		Negative	Negative	Positive	Positive		115.133	31.8382	Rheumatoid Arthritis
25	Female	36.7737	15.3428	27.2988		Positive				Negative		160.87	46.4095	Rheumatoid Arthritis
60	Male	48.6268		31.8001	21.7142	Negative		Positive	Positive		Negative	106.181	47.0551	Rheumatoid Arthritis
45	Male	37.0339				Negative	Negative		Negative	Negative		174.062	54.5284	Rheumatoid Arthritis
27	Female	35.3302	29.3035	32.3591		Positive	Positive					124.066	56.58	Rheumatoid Arthritis
61	Male	35.2953	27.895	25.7138		Positive		Negative	Negative	Negative				Rheumatoid Arthritis
38	Male		26.2024	38.3257	32.1387		Positive	Positive	Positive		Positive			Rheumatoid Arthritis
78	Male	43.5677	11.6776		31.1649	Positive	Positive	Positive	Negative		Positive	116.774	62.0824	Rheumatoid Arthritis
30	Female	29.9805	27.3042	26.0791	36.0677	Negative	Positive			Positive		130.331	14.6289	Rheumatoid Arthritis
48	Male	30.9576		30.1006	35.1437	Negative		Negative	Positive	Positive		134.121		Rheumatoid Arthritis
71	Male	45.749		35.6407	38.015	Negative	Negative	Negative				96.5095	58.3618	Rheumatoid Arthritis
75	Female	33.9752	26.3702	38.9129	24.3167	Positive	Negative		Negative		Negative	93.3058	60.7505	Rheumatoid Arthritis
21	Male	44.0364		24.2731		Positive	Positive	Negative	Positive	Positive	Negative	121.333	71.5907	Rheumatoid Arthritis
31	Male	27.4488	12.308	24.8529	33.0307	Negative	Negative	Positive	Positive	Negative	Negative		59.6071	Rheumatoid Arthritis
35	Female	43.6088	22.5841	26.7915	30.661	Positive		Positive	Positive			135.976		Rheumatoid Arthritis
68	Male	40.9532		31.8942	34.4106		Positive	Positive	Negative		Negative	130.143		Rheumatoid Arthritis
64	Male	33.9363				Negative	Negative	Negative	Positive			168.464	40.6581	Rheumatoid Arthritis
79	Female		21.4905	33.7597	35.7182	Positive	Negative	Positive		Negative	Negative	94.8796	46.1909	Rheumatoid Arthritis
55	Female	34.9449	19.2216	32.769		Positive	Positive		Positive	Negative	Negative	132.175	63.4679	Rheumatoid Arthritis
40	Male	26.9943	16.5968	32.6682		Negative	Negative	Positive			Positive	136.488	34.1512	Rheumatoid Arthritis
69	Male	39.3014	29.0541	30.3423	38.4241	Negative	Negative	Negative		Negative	Positive	130.001	54.0929	Rheumatoid Arthritis
68	Female	32.4752	24.2628		38.1387	Positive	Negative	Negative	Positive		Positive	191.276	31.4716	Rheumatoid Arthritis
70	Female	29.3928	24.9443	36.3599		Negative	Positive	Negative	Positive	Negative	Negative			Rheumatoid Arthritis
67	Male		13.6088	39.9523		Negative		Negative	Negative	Negative	Positive	133.33	40.7364	Rheumatoid Arthritis
59	Male	26.8343	23.8747	29.0669		Negative		Negative				164.497	20.5192	Rheumatoid Arthritis
67	Male	36.4828	14.751	22.0418	37.6698	Positive			Negative	Negative		170.876	51.1169	Rheumatoid Arthritis
32	Female	34.8962	23.5869	35.6139	36.8734	Negative		Positive	Positive	Negative	Negative	130.793		Rheumatoid Arthritis
24	Female	37.4233	14.3623			Positive	Negative	Negative	Positive	Negative	Negative	173.704	67.6092	Rheumatoid Arthritis
37	Male	39.9522	27.2284	21.738	32.6361	Positive	Negative	Negative	Negative			202.482	72.4793	Rheumatoid Arthritis
32	Female	27.4884	25.4082	28.5694					Negative			109.803	43.7585	Rheumatoid Arthritis
32	Male	31.0177	13.7027	26.0842		Positive		Negative			Negative	155.333		Rheumatoid Arthritis
44	Male	26.7798		34.7061	38.0179	Negative	Positive		Positive		Positive		45.5578	Rheumatoid Arthritis
73	Male	28.6482	26.4735	21.1366	32.5931	Negative		Positive	Positive		Positive	120.723	70.1747	Rheumatoid Arthritis
30	Male	30.5168		37.0504	33.3244	Positive		Positive	Positive		Negative	165.88	14.7512	Rheumatoid Arthritis
57	Male	26.2669		22.5826	24.1556	Negative	Positive	Positive	Positive	Negative		167.052		Rheumatoid Arthritis
64	Female	39.4608	23.8	36.3581	27.5168	Positive	Negative	Negative	Positive				37.0253	Rheumatoid Arthritis
43	Male	36.7182	18.3598	37.238	38.919	Negative	Negative	Negative	Positive	Negative		171.027	29.2374	Rheumatoid Arthritis
57	Female		26.0474	33.3987	29.8832	Negative		Negative		Positive	Negative	159.223	59.5452	Rheumatoid Arthritis
23	Male			32.8574	28.6626	Negative	Positive	Negative	Negative		Positive	128.336	50.8247	Rheumatoid Arthritis
38	Female	37.9182	27.6298	23.7447	23.645	Positive		Negative	Positive			137.892	52.4307	Rheumatoid Arthritis
68	Male	35.6862	19.475	26.4222	38.3841	Negative		Positive	Positive	Positive		103.005	73.3548	Rheumatoid Arthritis
60	Male	38.3739	19.0128	31.3632	27.0461	Negative			Negative	Positive	Negative	153.161		Rheumatoid Arthritis
61	Female	29.0155			23.3698	Negative	Positive	Positive		Negative	Positive	118.367	22.645	Rheumatoid Arthritis
38	Female	38.1786	29.1	29.9679			Negative	Negative	Positive			107.578	70.5516	Rheumatoid Arthritis
57	Female	31.9433	18.6298	38.8248	36.7744	Positive	Positive	Positive		Negative	Negative		60.9957	Rheumatoid Arthritis
80	Female	48.0465		32.5301	35.7894	Negative	Positive	Positive	Positive	Negative		94.1021	70.2001	Rheumatoid Arthritis
40	Female		14.848	25.5085	21.7795	Positive	Negative	Positive	Negative	Negative		168.043	53.4935	Rheumatoid Arthritis
78	Female	30.5672	27.2154	29.9661	35.4969	Negative		Negative			Positive	91.16	71.2902	Rheumatoid Arthritis
76	Male	39.1376				Positive	Positive	Positive	Positive	Negative	Negative	148.072	55.0777	Rheumatoid Arthritis
65	Male	35.2339	17.743		31.0524	Positive		Positive	Negative				69.117	Rheumatoid Arthritis
64	Male	36.1684	16.2728	35.4266	39.8667				Positive	Positive	Positive	98.8833		Rheumatoid Arthritis
77	Female	31.5587		37.1901		Negative	Negative	Positive	Negative	Positive	Negative		67.1577	Rheumatoid Arthritis
26	Female		29.4739	36.6368		Negative	Negative	Positive	Positive		Negative	114.938	71.7412	Rheumatoid Arthritis
27	Male	32.7544	12.3898	34.7286	23.6749	Positive	Positive	Positive	Negative	Negative	Positive	113.031		Rheumatoid Arthritis
31	Male	35.704	23.401	31.7025	31.0928	Negative		Negative		Negative	Positive			Rheumatoid Arthritis
78	Male	38.6995		25.9002	24.8294			Positive	Negative	Negative	Negative		33.6814	Rheumatoid Arthritis
55	Male	33.037	12.0861	38.7034		Positive		Positive	Negative		Positive	101.062	24.777	Rheumatoid Arthritis
50	Male	37.8082	28.6015	25.006	39.711	Positive	Positive	Positive				115.498	37.6712	Rheumatoid Arthritis
27	Male	29.0817	11.0784		29.6262	Negative	Positive		Negative	Positive		186.02	15.1003	Rheumatoid Arthritis
42	Male	29.9618	17.0018	33.6266			Positive	Positive	Negative	Positive	Negative	132.678	31.1258	Rheumatoid Arthritis
35	Female	26.0143		25.3506		Negative	Positive	Negative	Negative		Positive	142.977	60.0905	Rheumatoid Arthritis
41	Male	33.3139	13.433	35.5008	38.2205	Positive	Negative	Negative	Positive	Positive	Negative	199.059	52.0313	Rheumatoid Arthritis
72	Male	47.5029	22.3708	26.2146	38.7126	Negative			Positive		Positive	157.339	55.2186	Rheumatoid Arthritis
23	Female	29.3579	28.4565	26.6087	21.6105		Negative	Positive	Negative	Positive		185.014	27.7821	Rheumatoid Arthritis
59	Male			23.8166	32.8325	Negative		Negative	Positive			95.7567		Rheumatoid Arthritis
47	Male	29.1203	28.0724	25.2097	33.6949	Positive	Positive	Negative	Negative	Negative	Negative		66.0385	Rheumatoid Arthritis
79	Female	38.1378	21.5049	22.7931	23.3918	Positive	Negative		Positive	Negative	Negative	156.179	57.1553	Rheumatoid Arthritis
44	Female	33.1443	18.1625	28.596	39.3632	Negative	Negative	Positive	Negative		Positive	196.603	68.595	Rheumatoid Arthritis
58	Female	27.016	26.6487	36.0252	21.0376		Negative	Positive	Positive	Negative	Positive	171.259		Rheumatoid Arthritis
42	Female	47.117	25.5262	31.4176		Positive	Negative		Negative	Negative	Negative	127.176	12.3333	Rheumatoid Arthritis
42	Male	48.7689	25.3959	28.9287	23.4677	Positive	Negative	Negative	Positive	Negative	Negative	195.946	72.3517	Rheumatoid Arthritis
44	Male	28.5446		25.3336		Negative	Negative	Negative	Positive	Negative		194.103	73.1087	Rheumatoid Arthritis
35	Male	34.1167		29.5592	23.2054			Negative	Negative				38.3673	Rheumatoid Arthritis
30	Male	47.3457		29.7333	34.4011	Negative	Negative	Positive	Positive		Negative	101.412		Rheumatoid Arthritis
66	Female	26.6632	17.7858	21.8146	28.7138	Negative	Positive		Negative			100.289	17.8674	Rheumatoid Arthritis
64	Male	35.7508	12.39	32.5558	26.4275	Negative	Positive	Negative		Positive		178.467	56.6441	Rheumatoid Arthritis
56	Female	28.56	28.9071	22.0835	29.8406	Positive	Negative		Positive	Positive		168.143		Rheumatoid Arthritis
80	Female	28.1264	15.3351	22.5274	38.5931			Positive	Positive		Positive	157.437	23.3003	Rheumatoid Arthritis
44	Female	28.806		34.3064				Negative	Positive	Positive	Positive	174.555	25.2379	Rheumatoid Arthritis
30	Male	35.9959	14.7916		24.8365	Positive			Negative		Positive	157.613	57.6059	Rheumatoid Arthritis
44	Male	40.5987		34.9792	21.2533	Negative	Positive	Positive	Positive		Positive		18.8078	Rheumatoid Arthritis
67	Female	31.1649	21.8091	21.7701		Positive	Positive	Negative	Positive	Negative	Positive	153.345	27.1807	Rheumatoid Arthritis
62	Female	27.2968		37.3802		Positive	Positive	Positive	Positive		Positive	123.781	56.0385	Rheumatoid Arthritis
22	Male	32.4442	11.0796	30.0325	27.6863	Negative	Positive	Positive					18.6944	Rheumatoid Arthritis
24	Male	31.4321	13.5713	30.6687	26.2292	Negative	Positive	Positive				113.86	67.8243	Rheumatoid Arthritis
60	Female		21.1538	23.0025	21.4405		Negative	Positive		Positive	Negative	175.285	53.5419	Rheumatoid Arthritis
21	Male	39.7745	16.7586	34.7701	32.4342	Positive	Negative	Negative	Positive					Rheumatoid Arthritis
72	Male	38.2957	17.8871	36.4659	25.6501			Negative	Positive	Negative		153.436	24.9194	Rheumatoid Arthritis
46	Female	45.416	12.8333		37.5638	Negative	Negative	Negative	Positive	Positive	Negative	164.197	29.5574	Rheumatoid Arthritis
57	Female	31.5613	11.2475	25.6039	35.8584			Negative		Negative		192.496	16.9925	Rheumatoid Arthritis
61	Female	30.9976	24.6957	37.5066	24.6473	Negative	Positive		Negative	Positive	Positive	166.443	34.016	Rheumatoid Arthritis
28	Male	29.1207	17.45	39.3438	30.4383	Positive	Negative					112.213		Rheumatoid Arthritis
48	Male	37.9732	17.9852		24.2314	Positive	Positive	Negative	Negative	Negative	Negative	132.58	62.101	Rheumatoid Arthritis
32	Male	26.6536	24.483	33.666	23.6182	Negative	Negative		Positive		Negative	125.05	16.6795	Rheumatoid Arthritis
64	Female	29.0406	25.6141	24.9625	23.8552	Negative		Negative		Positive		205.084	48.6691	Rheumatoid Arthritis
23	Male	43.7958	22.8244	23.9176	26.108		Negative	Negative	Positive	Positive	Positive	100.287	33.8674	Rheumatoid Arthritis
49	Male	39.1529				Positive	Positive			Positive			62.0932	Rheumatoid Arthritis
60	Female	33.0741	11.0578	39.0274		Negative	Negative		Positive		Negative	122.983	52.3566	Rheumatoid Arthritis
20	Male	33.5131	26.5491						Positive	Negative		104.078	37.8474	Rheumatoid Arthritis
80	Male	31.748	13.575	30.05	36.9779	Positive	Positive	Negative	Negative		Negative	129.28	40.8074	Rheumatoid Arthritis
58	Female	36.0842	24.5766	36.631	38.5974	Negative	Negative	Negative	Negative	Negative		170.084		Rheumatoid Arthritis
30	Male	37.3809	27.5622	38.5323	24.2471	Positive	Positive	Positive	Positive	Positive		161.713	13.9279	Rheumatoid Arthritis
24	Female	36.9541		21.2807	26.0782	Negative	Positive	Negative	Negative			91.1024	52.0894	Rheumatoid Arthritis
23	Male	35.2495		31.7944				Negative	Negative	Positive		151.748	42.5761	Rheumatoid Arthritis
27	Female	33.0032	12.0153	21.698	22.6184	Positive	Negative	Positive				168.71	48.6466	Rheumatoid Arthritis
74	Male		22.7252	33.7941		Negative	Negative	Negative	Positive		Positive	154.172		Rheumatoid Arthritis
56	Male		22.755	22.4008	39.2227	Positive	Negative	Negative	Positive	Positive		122.786	19.0224	Rheumatoid Arthritis
22	Male	35.1832	15.3092	32.7824	38.0945	Positive	Negative	Negative		Positive	Positive	151.084	17.7862	Rheumatoid Arthritis
71	Female	39.4041	26.7015		32.1898		Negative	Positive	Positive	Negative		116.365	14.3403	Rheumatoid Arthritis
78	Female	34.3844	26.2814	36.4615		Positive	Negative		Positive	Positive	Negative	123.667	58.1673	Rheumatoid Arthritis
43	Female	43.0375		35.6671	23.4971		Positive	Positive		Negative	Negative	102.498		Rheumatoid Arthritis
66	Female	34.681	13.4542	36.7713		Positive	Positive	Negative	Negative	Negative		152.122		Rheumatoid Arthritis
43	Female	35.6345	19.0275	29.3588		Negative	Positive	Positive		Positive		153.982	71.459	Rheumatoid Arthritis
49	Male	27.4038	17.2864	27.457	39.2371	Positive		Positive	Positive	Negative		103.724	20.7923	Rheumatoid Arthritis
63	Male	27.6426	16.5502	29.3321	27.8116	Positive	Positive	Negative	Negative	Positive	Negative	165.509	26.0911	Rheumatoid Arthritis
51	Female	33.11	26.7746	38.9418		Positive		Positive				122.61	28.4281	Rheumatoid Arthritis
78	Male	35.237	15.04	32.6103	28.2634		Negative		Negative			171.895	17.6297	Rheumatoid Arthritis
57	Male	39.0989	26.9795	22.4922	31.5346			Negative	Negative					Rheumatoid Arthritis
35	Female	38.1444	28.4352	38.8146	31.5423	Negative	Negative	Negative	Negative	Positive		92.6192	73.9319	Rheumatoid Arthritis
41	Male	36.0903	29.7315	30.5673	23.4776		Negative	Negative			Negative	142.09	40.0426	Rheumatoid Arthritis
36	Female	32.3678	24.7781	27.4072	39.0896	Negative	Negative		Positive		Positive	163.241	21.2346	Rheumatoid Arthritis
31	Female	39.429		29.3549	34.5463	Positive	Positive	Positive	Negative	Negative	Positive	184.499	25.3469	Rheumatoid Arthritis
27	Male	29.999	11.7901	32.9514		Negative	Positive	Negative	Positive	Negative	Negative	140.511	56.2957	Rheumatoid Arthritis
20	Male	28.7326	16.8327	24.8372	29.5726	Negative			Negative	Positive			63.6892	Rheumatoid Arthritis
29	Male	39.8367	28.3851	34.7827	26.5323			Positive	Negative		Positive	137.08	32.2388	Rheumatoid Arthritis
50	Female	39.6672	24.1822	34.5459	26.324	Positive		Negative	Negative	Negative	Negative	157.847		Rheumatoid Arthritis
77	Female	27.1634	21.0313	26.5428			Positive	Negative			Positive	153.134		Rheumatoid Arthritis
79	Male	26.1316	22.9421	31.1143	34.5172	Positive	Negative	Positive		Negative	Positive		15.1138	Rheumatoid Arthritis
50	Male	32.713	29.3513	36.3127		Positive	Positive	Negative	Negative	Positive		205.704	16.1414	Rheumatoid Arthritis
70	Male	41.5473		23.5411	36.0788						Negative	161.647		Rheumatoid Arthritis
79	Female	41.8115	25.3424	32.1863	35.8796	Positive		Positive	Positive	Negative		97.8277	63.2477	Rheumatoid Arthritis
44	Female	27.8019		30.0588	21.4466	Negative		Negative		Negative		110.63	26.4913	Rheumatoid Arthritis
54	Male	36.3706	27.8251	33.0824		Negative	Positive	Positive	Positive	Positive	Positive	125.621	19.9457	Rheumatoid Arthritis
73	Male		13.7608	33.6159	25.3201	Negative		Negative		Positive		124.182		Rheumatoid Arthritis
40	Female	29.9243		31.3504	37.5089	Positive	Positive	Positive	Positive		Negative		74.8151	Rheumatoid Arthritis
22	Male	36.637	20.4082	32.745	30.8163			Positive		Negative		114.153	45.6124	Rheumatoid Arthritis
57	Male	34.3784	25.6747	39.9163		Negative	Positive	Negative	Negative	Negative	Negative	152.049	13.2469	Rheumatoid Arthritis
77	Male	45.2907	16.7777	30.71	31.4363	Negative		Positive	Positive	Negative		124.969		Rheumatoid Arthritis
40	Female	36.6659		35.4793		Negative		Negative	Positive		Positive	164.3	18.4132	Rheumatoid Arthritis
31	Male	33.6914	13.0985	21.3044	29.884	Positive	Negative		Positive		Positive	170.675	47.7607	Rheumatoid Arthritis
72	Male	38.4743	26.5404	34.6605		Positive				Positive			40.6785	Rheumatoid Arthritis
59	Male	37.9491	15.3018	36.678		Negative	Negative	Positive	Negative				66.4739	Rheumatoid Arthritis
24	Female	39.5032		24.0416	24.0421	Negative	Negative	Positive	Negative		Negative	95.1014	24.7222	Rheumatoid Arthritis
66	Female	49.8527	21.038	33.3577		Negative	Positive	Positive	Positive	Positive		113.142	32.4096	Rheumatoid Arthritis
54	Male	36.7593	11.4098	36.9065	37.8636	Positive	Negative	Positive	Positive	Negative	Positive	168.855		Rheumatoid Arthritis
50	Male	33.262	13.1103	33.8662	31.958	Negative	Negative	Positive	Positive	Positive		149.98		Rheumatoid Arthritis
45	Female	27.3707	21.7132	35.5238	39.1904	Negative	Positive	Negative				138.24	28.8119	Rheumatoid Arthritis
79	Female	43.2555	14.6994		24.6716	Positive	Positive	Negative	Negative	Positive		119.369	46.8351	Rheumatoid Arthritis
52	Female	36.3336	15.4376	36.7097		Negative	Negative	Positive			Positive	170.364	61.8866	Rheumatoid Arthritis
66	Female	44.9011		23.1847	25.1906		Positive	Negative	Negative				66.58	Rheumatoid Arthritis
77	Male	35.6941	11.3136		32.4141	Positive		Negative	Negative	Positive	Positive	190.128	39.1087	Rheumatoid Arthritis
43	Female	31.9352	14.7816	29.5407	37.9036	Positive	Positive	Negative		Negative	Positive	94.2923	43.9821	Rheumatoid Arthritis
24	Female			25.1065			Positive		Negative	Negative		145.76	48.6513	Rheumatoid Arthritis
31	Female	36.5431		27.7761	30.3578	Positive	Negative	Positive	Positive	Negative		98.3035		Rheumatoid Arthritis
28	Male	31.7203	17.2199	36.3878	39.2213	Negative	Negative	Positive		Positive		184.107	50.6923	Rheumatoid Arthritis
75	Female	38.778		30.5187	36.3442	Negative		Positive	Positive		Negative	144.003	68.2413	Rheumatoid Arthritis
64	Male	33.7533	25.5467	37.3383	36.5135	Positive			Positive	Negative	Negative	178.934	44.4209	Rheumatoid Arthritis
74	Male	43.522	27.2114	33.9245		Positive	Negative	Positive	Negative	Negative	Negative	147.507	50.6552	Rheumatoid Arthritis
51	Female	47.3702	26.4663	30.3146	25.1281	Positive	Positive		Positive	Positive	Negative	127.516	52.3274	Rheumatoid Arthritis
24	Female	37.8489	28.6239	29.2936	25.0211	Negative	Negative	Positive	Positive	Negative	Positive	91.8608	14.8255	Rheumatoid Arthritis
57	Male	38.6848	22.9238	35.0077	32.7104	Negative	Negative	Negative			Positive	113.964	52.2722	Rheumatoid Arthritis
33	Female	36.3214	16.6501	25.9027	27.7368	Negative	Negative	Negative		Positive	Negative	103.382	54.5969	Rheumatoid Arthritis
26	Male	38.9929	24.8883	26.1271	24.2065	Negative	Positive			Positive		154.645	60.7531	Rheumatoid Arthritis
21	Male	37.8724	11.7031	28.6543			Negative	Negative	Negative	Positive	Positive	195.984		Rheumatoid Arthritis
60	Female		25.7179	33.3418	32.8783	Positive	Negative	Negative	Negative	Positive	Positive	137.67	22.2595	Rheumatoid Arthritis
73	Female	32.2437	13.6299	22.814	38.9894	Positive			Negative		Positive		18.0076	Rheumatoid Arthritis
74	Male	31.3607	28.0849	32.0226		Negative			Positive	Negative	Positive	143.922	57.3933	Rheumatoid Arthritis
55	Female		16.0475	24.2617	37.7942			Negative	Positive			165.021	44.1533	Rheumatoid Arthritis
48	Male	32.5154	15.6835	35.0282	22.4195	Positive	Positive		Negative		Positive	156.189	63.3557	Rheumatoid Arthritis
78	Female	39.8321		28.2549		Negative	Positive		Negative	Negative		118.485	67.6411	Rheumatoid Arthritis
34	Female	31.1908	29.2536	21.8592	23.3735	Negative	Positive	Positive	Positive		Positive	161.782	71.5758	Rheumatoid Arthritis
20	Male	35.2753	27.9701	31.9603	37.017	Negative	Positive				Negative	140.497	40.3144	Rheumatoid Arthritis
35	Female	37.9388	20.5685	29.0531	35.7114	Positive			Positive	Negative		157.798	37.2855	Rheumatoid Arthritis
54	Male	29.2239	19.4824	25.8335		Positive	Negative	Positive		Negative		123.649	38.9215	Rheumatoid Arthritis
77	Male	49.2336	28.0616	32.7797	38.5739	Negative	Positive	Positive	Positive	Negative		172.852		Rheumatoid Arthritis
62	Female	44.2523	17.4206		25.0127	Positive		Positive	Positive			130.988	27.9969	Rheumatoid Arthritis
21	Male	26.5465		36.2028	33.0962	Positive	Positive	Positive	Positive			144.092		Rheumatoid Arthritis
54	Male	40.6125		25.0979	33.4479	Negative	Positive	Positive	Positive			146.809	56.6586	Rheumatoid Arthritis
42	Male	34.8671		22.4688	35.375	Positive		Negative	Negative	Positive		105.42		Rheumatoid Arthritis
[truncated: 10,086 more rows]
